# Supplementary material for: Structure and Reactivity of [Ru–Al] and [Ru–Sn] Heterobimetallic PPh3-Based Complexes
Source: PubMed Central journal article supplement (PMC9554919; doi:10.1021/acs.organomet.2c00344), 2022-09-21
Supplement: om2c00344_si_002.pdf [file om2c00344_si_002.pdf]

## SUPPORTING INFORMATION

### Structure and Reactivity of [Ru-Al] and [Ru-Sn] Heterobimetallic PPh<sub>3</sub>-Based Complexes

Connie J. Isaac, Fedor M. Miloserdov, Anne-Frédérique Pécharman, John P. Lowe, Claire L. McMullin, and Michael K. Whittlesey

Department of Chemistry, University of Bath, Claverton Down, Bath BA2 7AY, UK

#### Contents

|                       |      |
|-----------------------|------|
| NMR spectra           | S-2  |
| Table S1              | S-61 |
| Computational Details | S-62 |

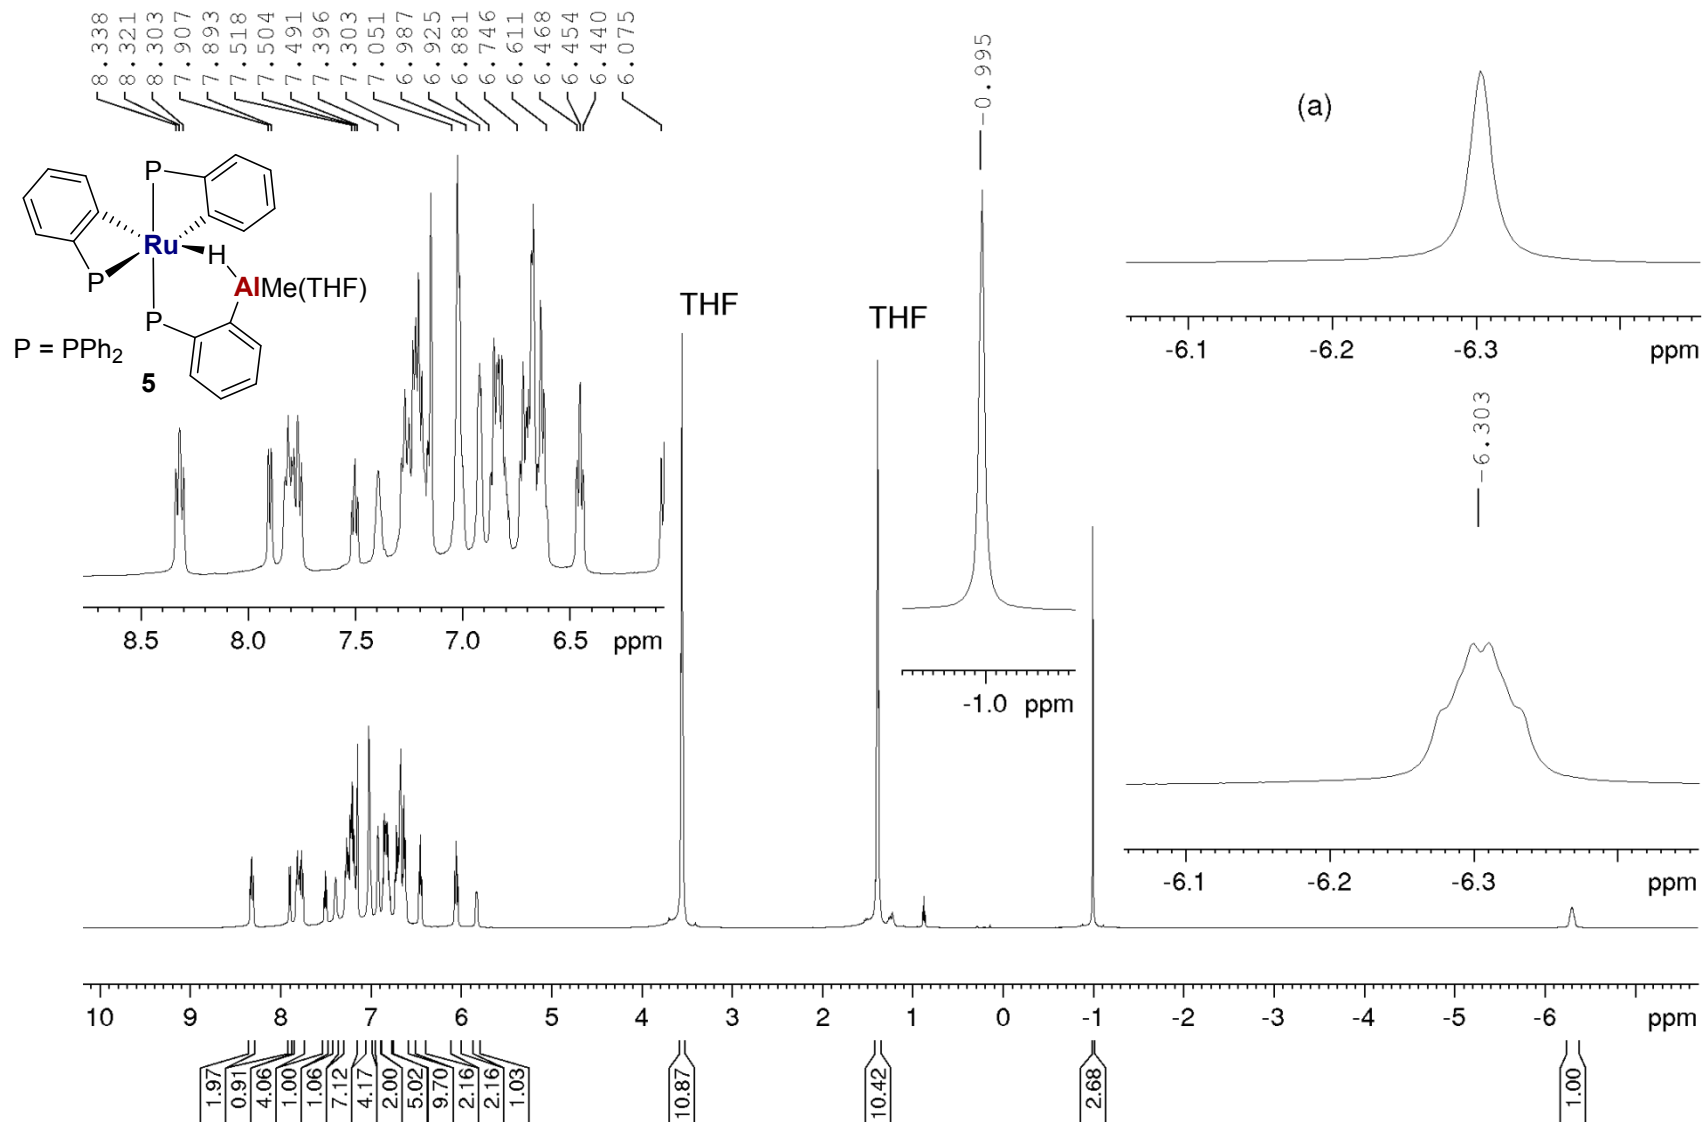

**Figure S1.**  $^1\text{H}$  NMR spectrum (500 MHz,  $\text{C}_6\text{D}_6$ , 298 K) of  $[\text{Ru}(\text{C}_6\text{H}_4\text{PPh}_2)_2\{\text{PPh}_2\text{C}_6\text{H}_4\text{AlMe}(\text{THF})\}\text{H}]$  **5**, with expansions of aromatic, AlMe and Ru-H-Al regions. Inset (a) shows the latter signal in the  $^1\text{H}\{^3\text{P}\}$  NMR spectrum (500 MHz,  $\text{C}_6\text{D}_6$ , 298 K).

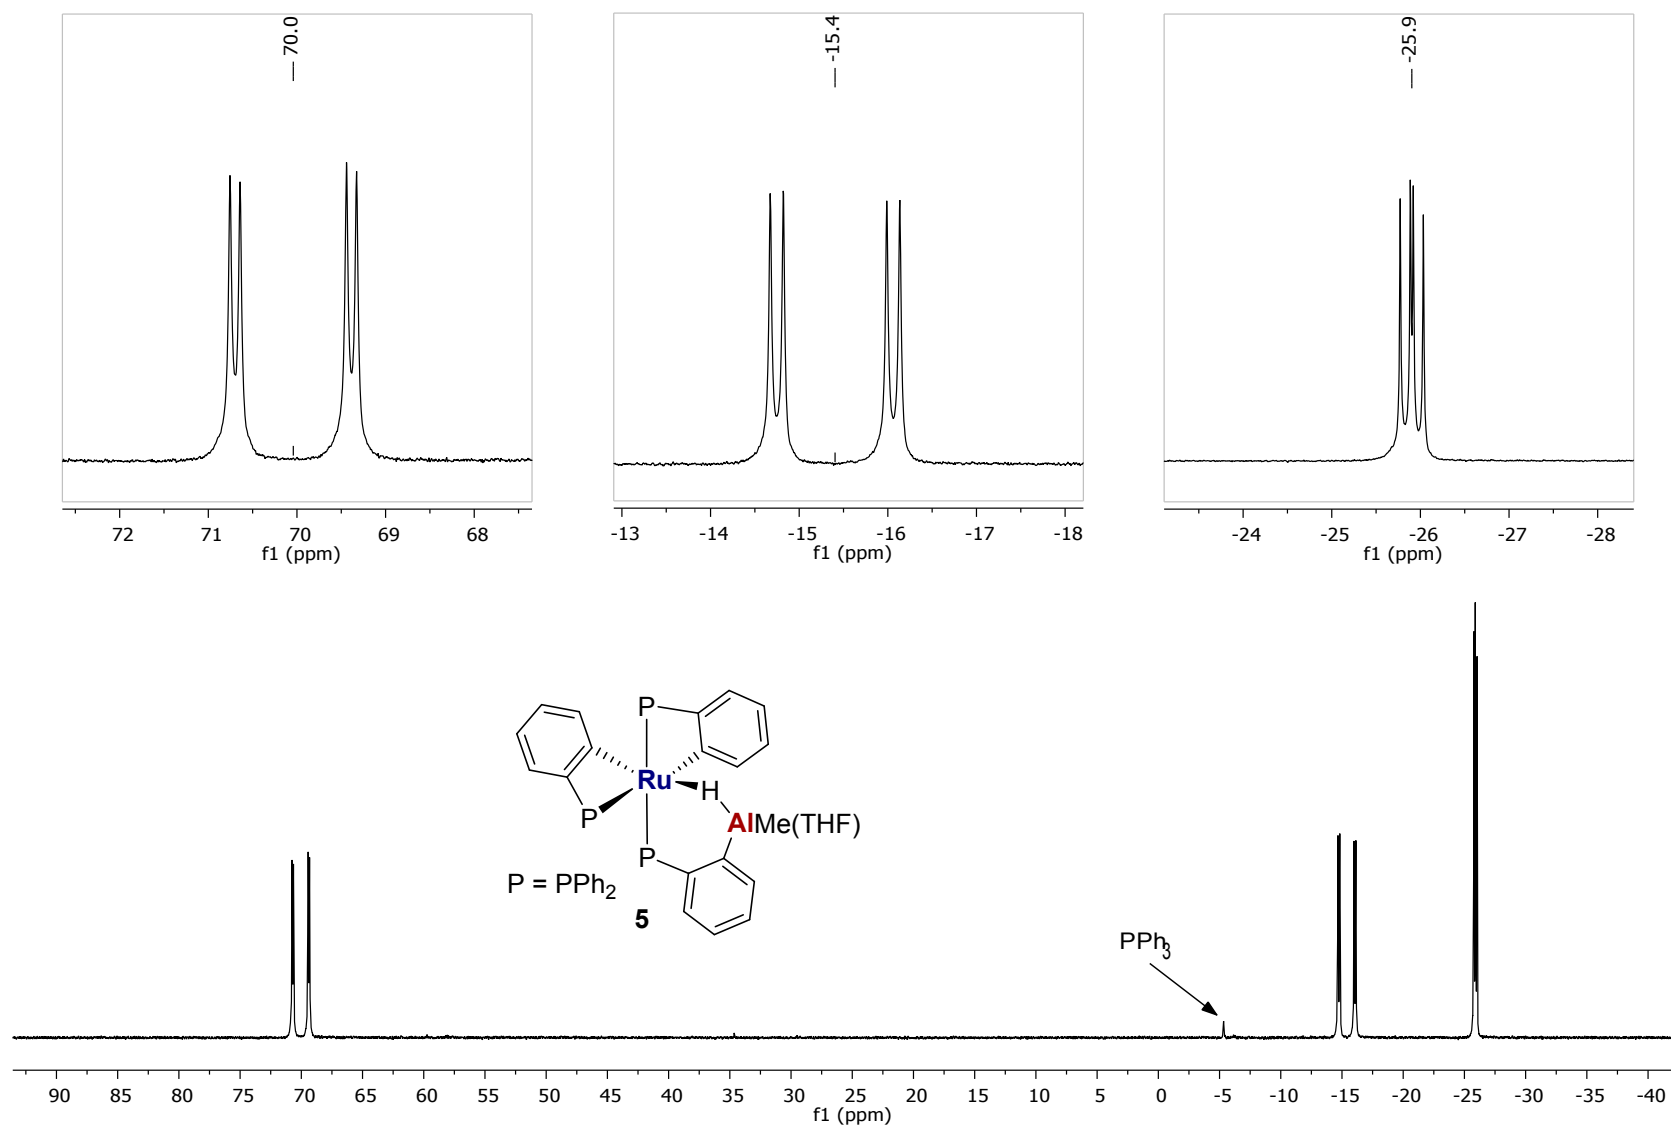

**Figure S2.**  $^{31}\text{P}\{^1\text{H}\}$  NMR spectrum (202 MHz,  $\text{C}_6\text{D}_6$ , 298 K) of  $[\text{Ru}(\text{C}_6\text{H}_4\text{PPh}_2)_2\{\text{PPh}_2\text{C}_6\text{H}_4\text{AlMe}(\text{THF})\}\text{H}]$  **5**.

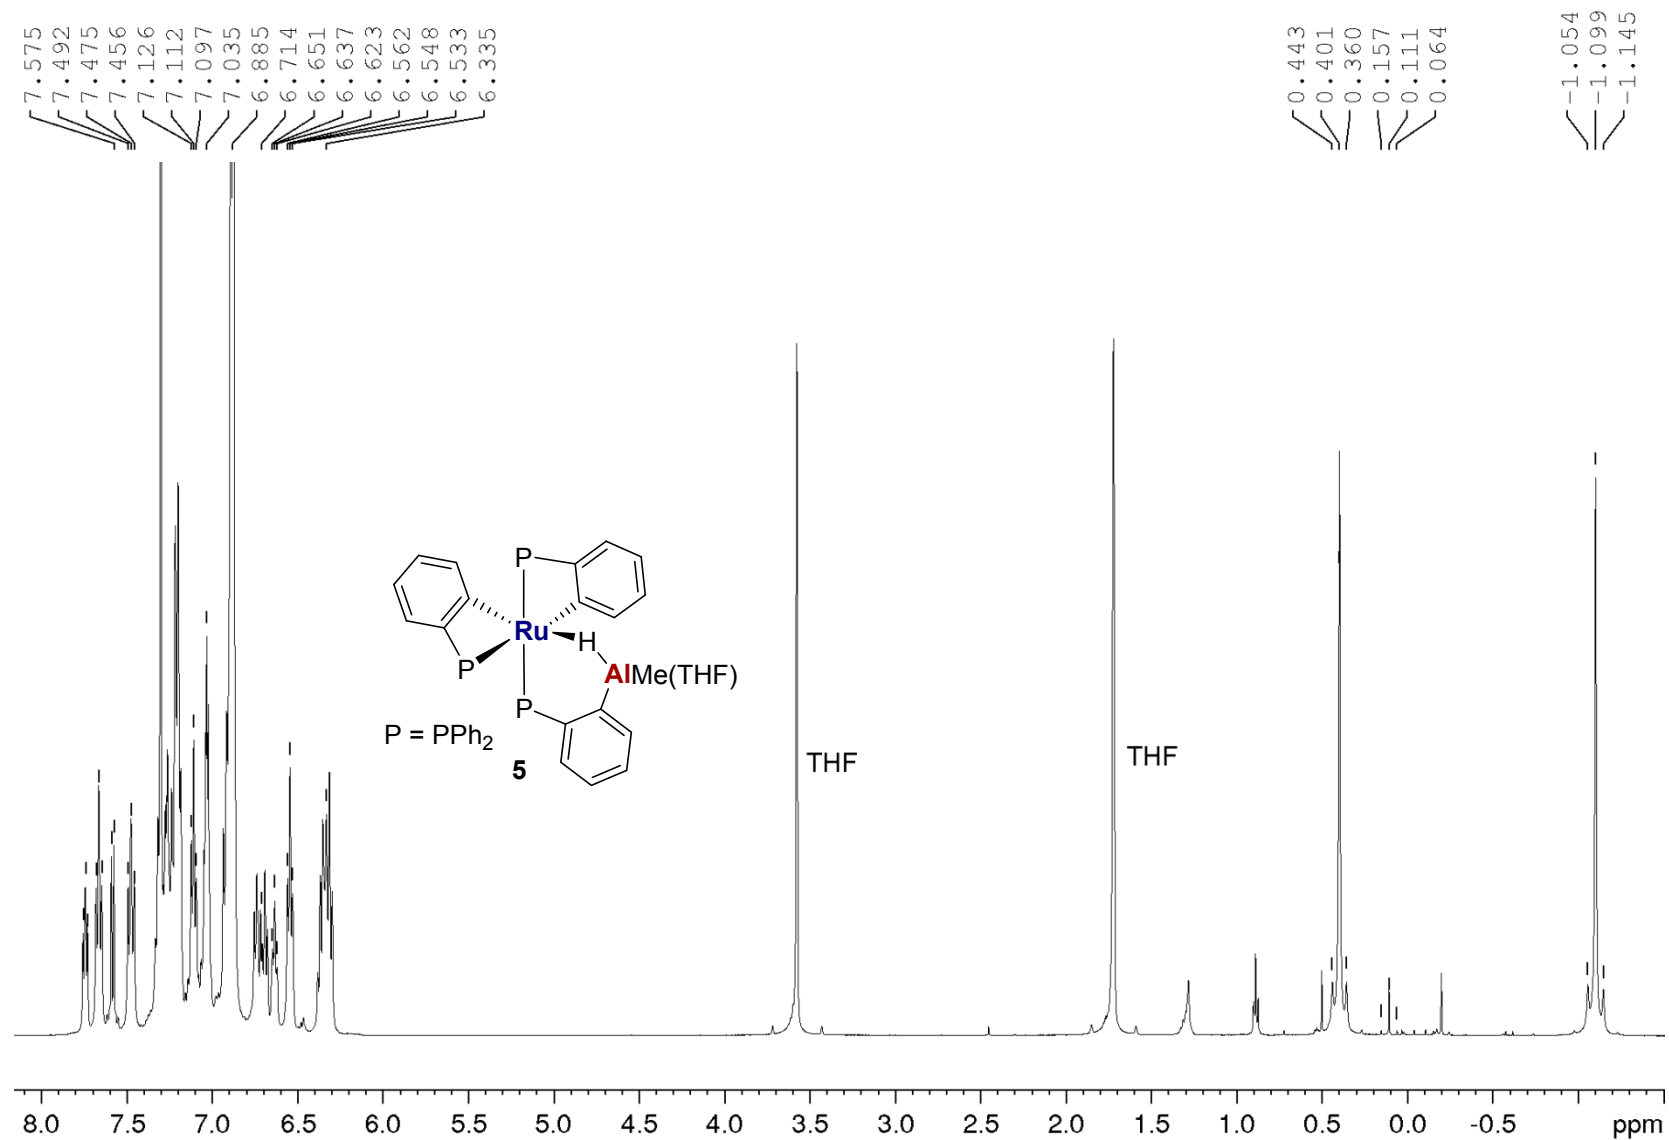

**Figure S3.**  $^1\text{H}$  NMR spectrum (500 MHz,  $\text{THF-}d_8$ , 298 K) of  $[\text{Ru}(\text{PPh}_3)(\text{C}_6\text{H}_4\text{PPh}_2)\{\text{PPh}_2\text{C}_6\text{H}_4\text{SnMe}_2\}]$  **5**.



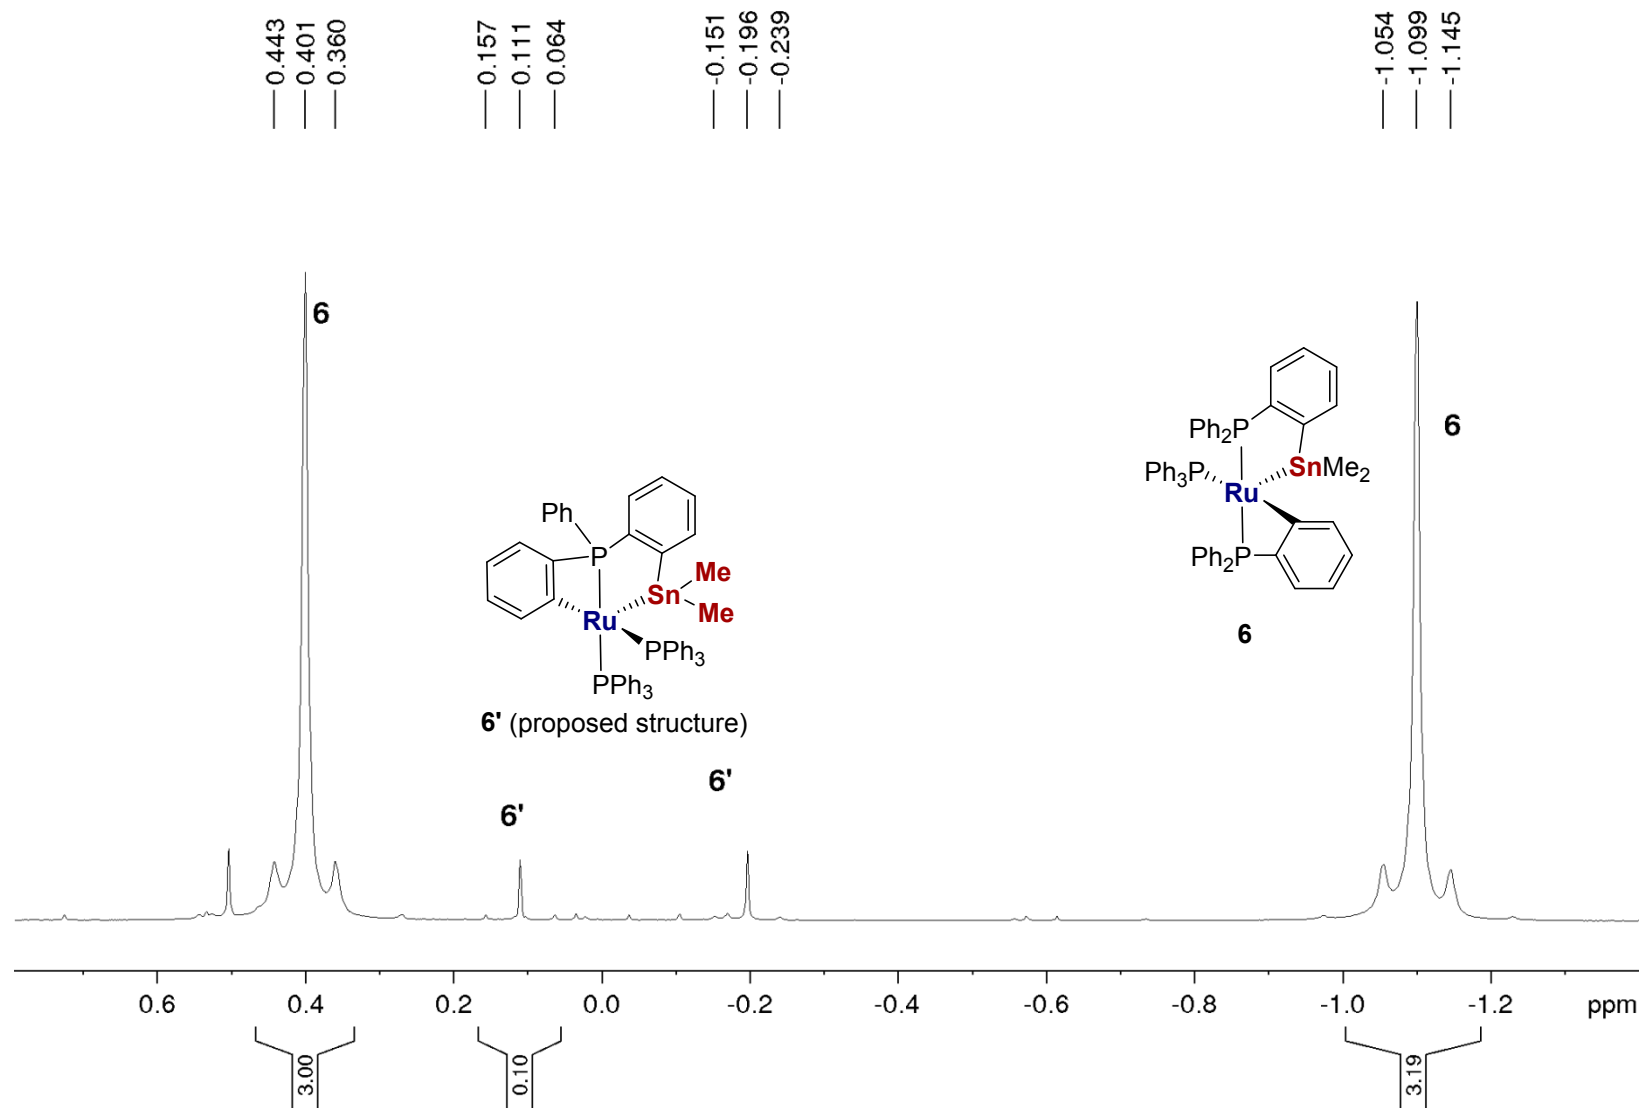

**Figure S4.** Partial  $^1\text{H}$  NMR spectrum (500 MHz,  $\text{THF-}d_8$ , 298 K) of  $[\text{Ru}(\text{PPh}_3)(\text{C}_6\text{H}_4\text{PPh}_2)\{\text{PPh}_2\text{C}_6\text{H}_4\text{SnMe}_2\}]$  **6** showing  $\text{SnMe}$  signals for **6** and proposed minor isomer **6'**.

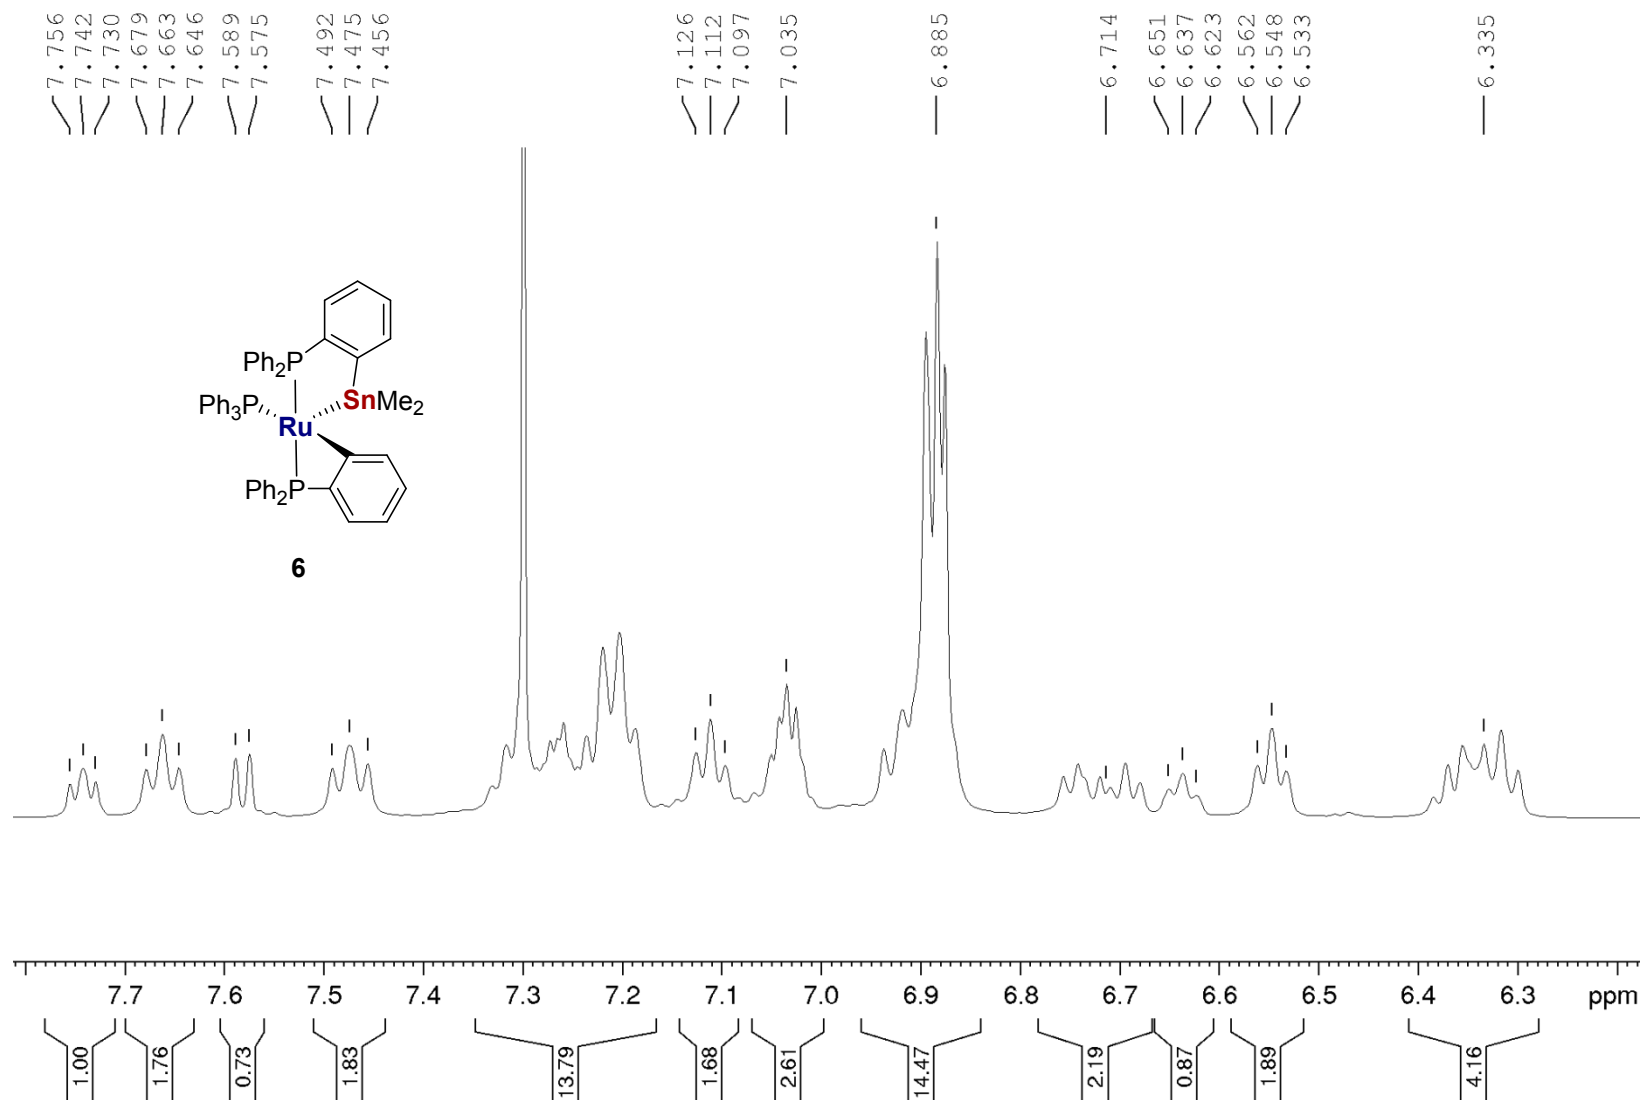

**Figure S5.** Aromatic region of the  $^1\text{H}$  NMR spectrum (500 MHz,  $\text{THF-}d_8$ , 298 K) of  $[\text{Ru}(\text{PPh}_3)(\text{C}_6\text{H}_4\text{PPh}_2)\{\text{PPh}_2\text{C}_6\text{H}_4\text{SnMe}_2\}]$  **6**.

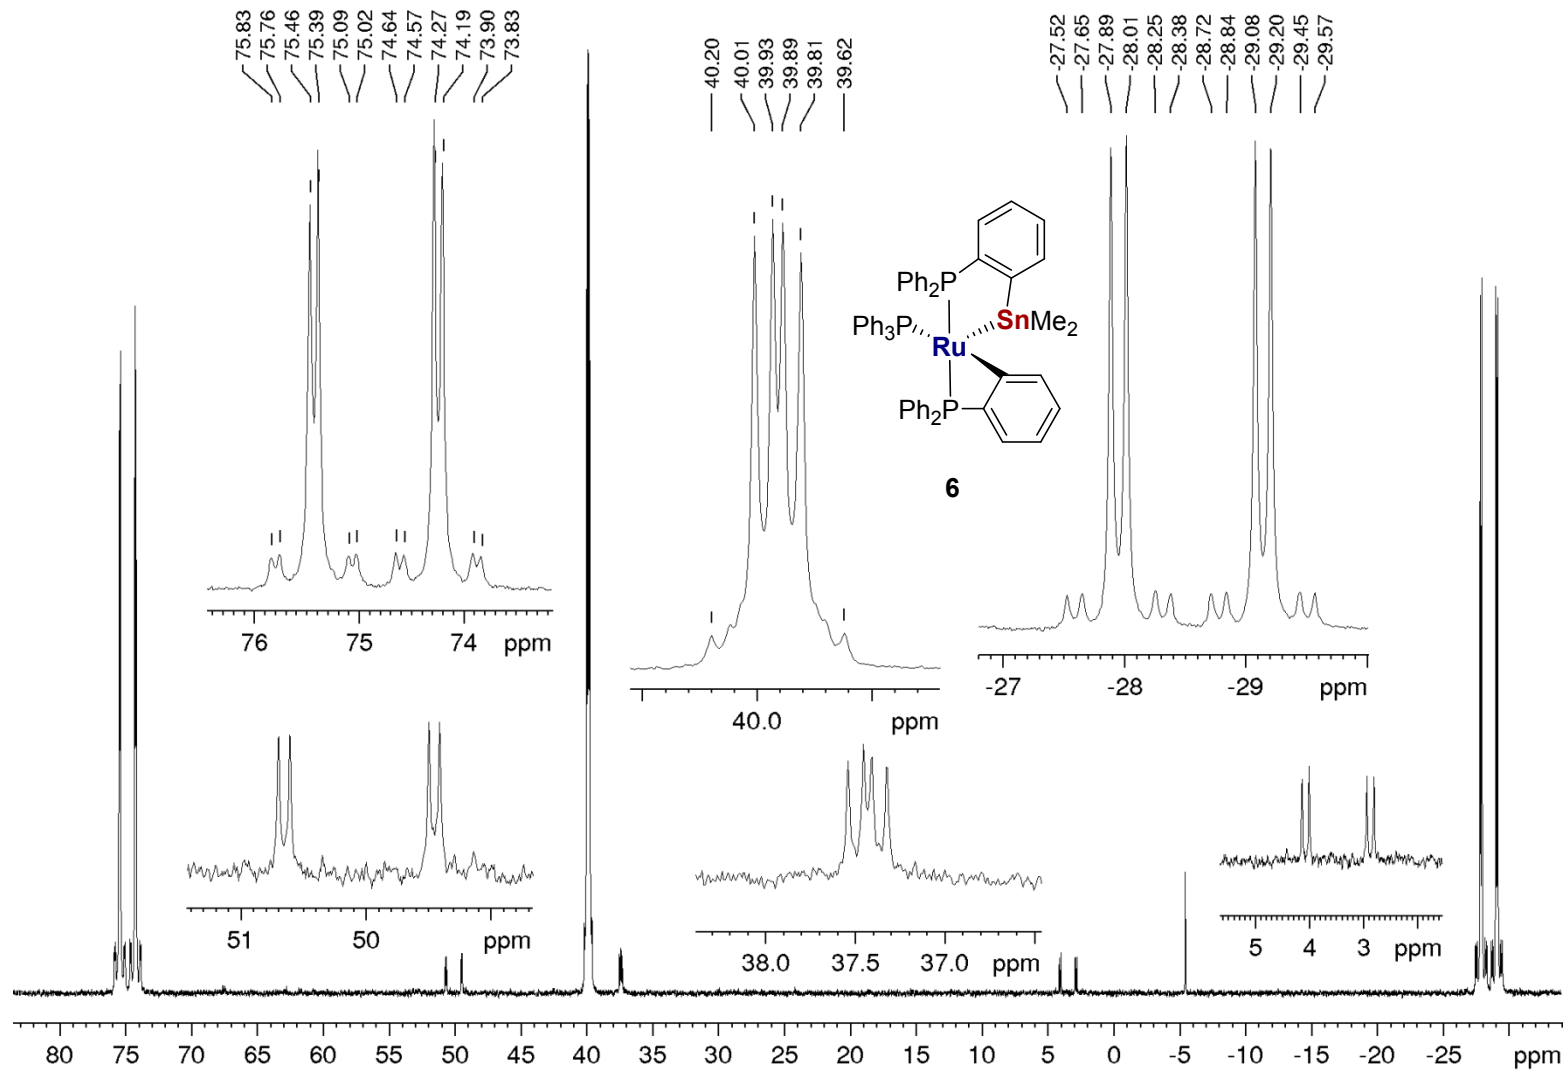

**Figure S6.** <sup>31</sup>P{<sup>1</sup>H} NMR spectrum (202 MHz, THF-*d*<sub>8</sub>, 298 K) showing resonances for major species [Ru(PPh<sub>3</sub>)(C<sub>6</sub>H<sub>4</sub>PPh<sub>2</sub>){PPh<sub>2</sub>C<sub>6</sub>H<sub>4</sub>SnMe<sub>2</sub>}] **6**. Smaller resonances arise from the proposed minor species **6'**.

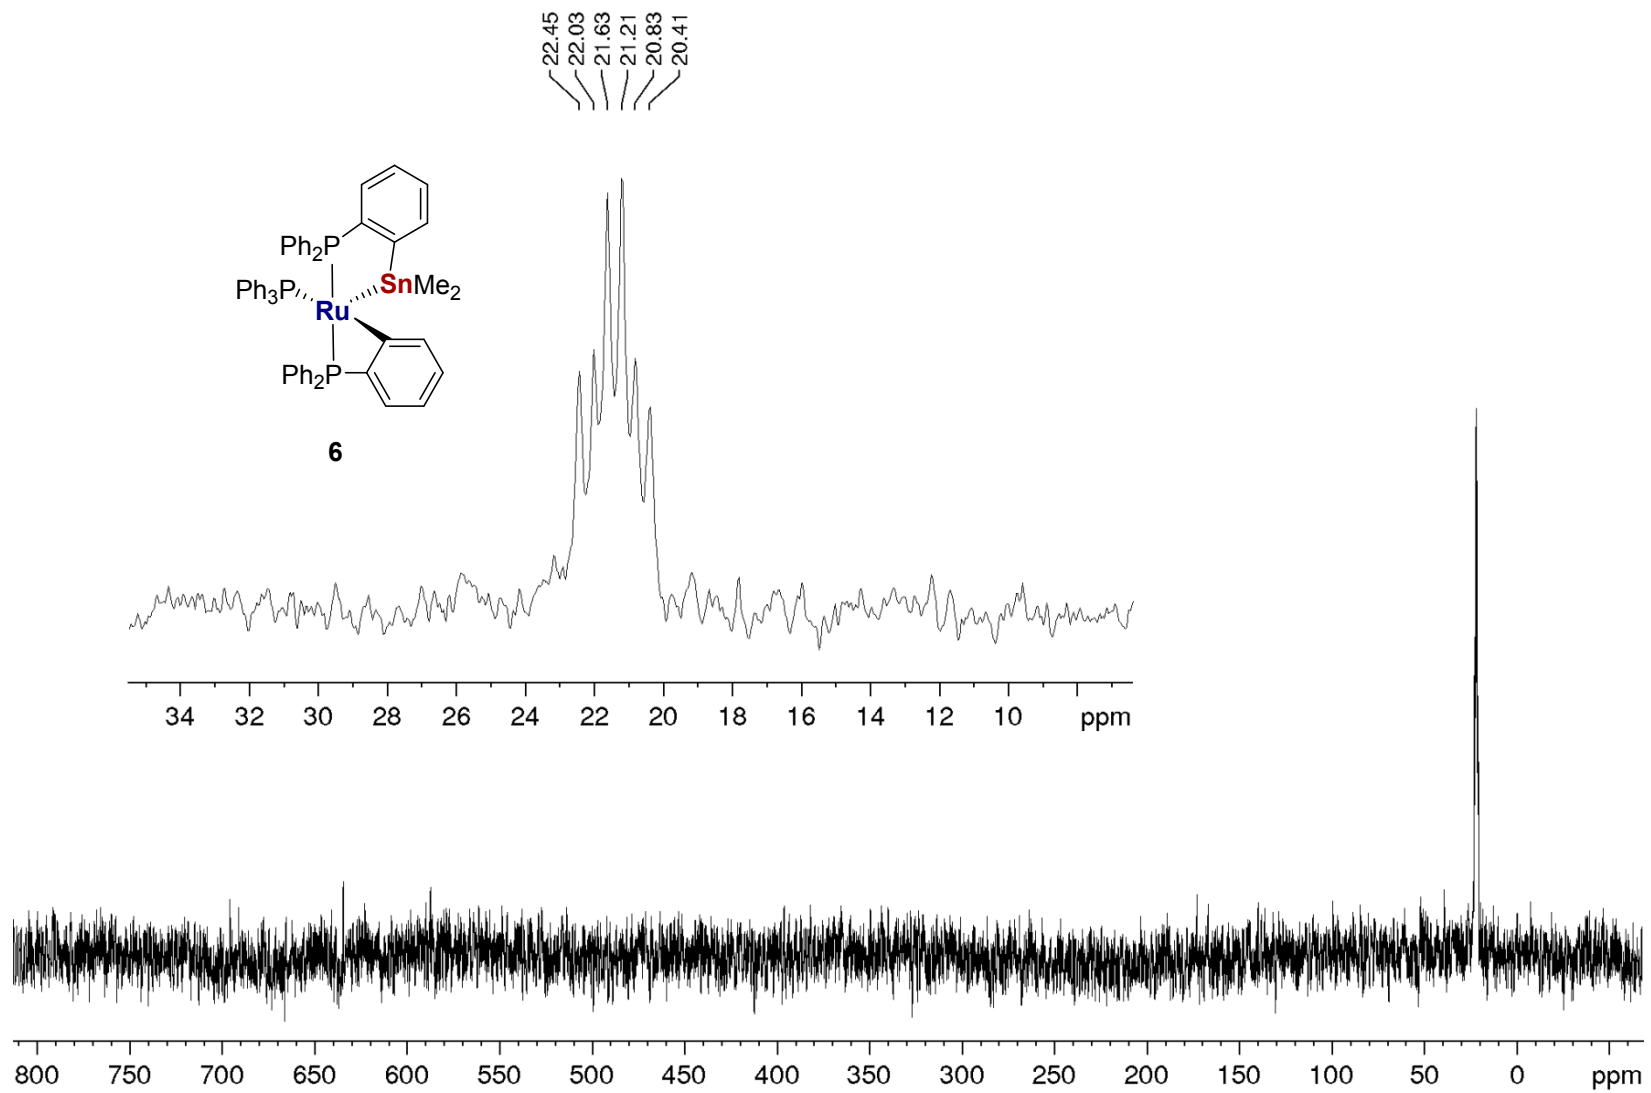

**Figure S7.**  $^{119}\text{Sn}\{^1\text{H}\}$  NMR spectrum (187 MHz, THF- $d_8$ , 298 K) of  $[\text{Ru}(\text{PPh}_3)(\text{C}_6\text{H}_4\text{PPh}_2)\{\text{PPh}_2\text{C}_6\text{H}_4\text{SnMe}_2\}]$  **6**.

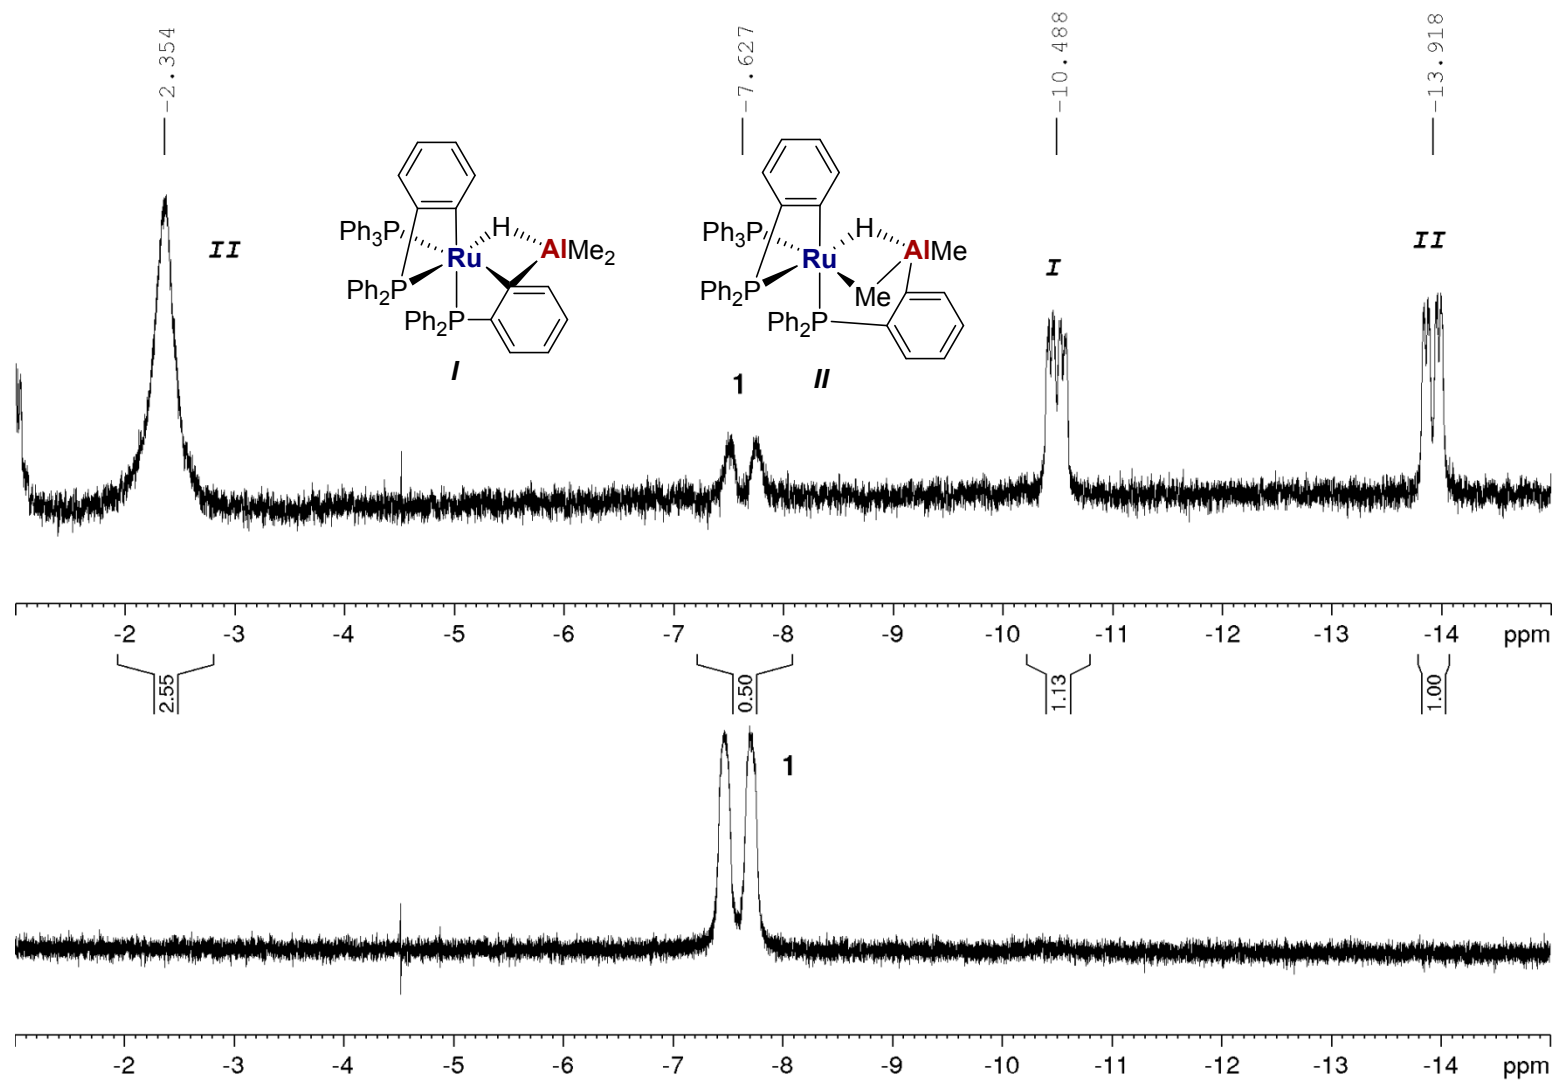

**Figure S8.** Low frequency region of the  $^1\text{H}$  NMR spectrum (400 MHz,  $\text{THF-}d_8$ , 193 K) of (bottom) **1** and (top) intermediates **I** and **II** formed upon addition of  $\text{Me}_2\text{AlCl}$  (15 min at 193 K).

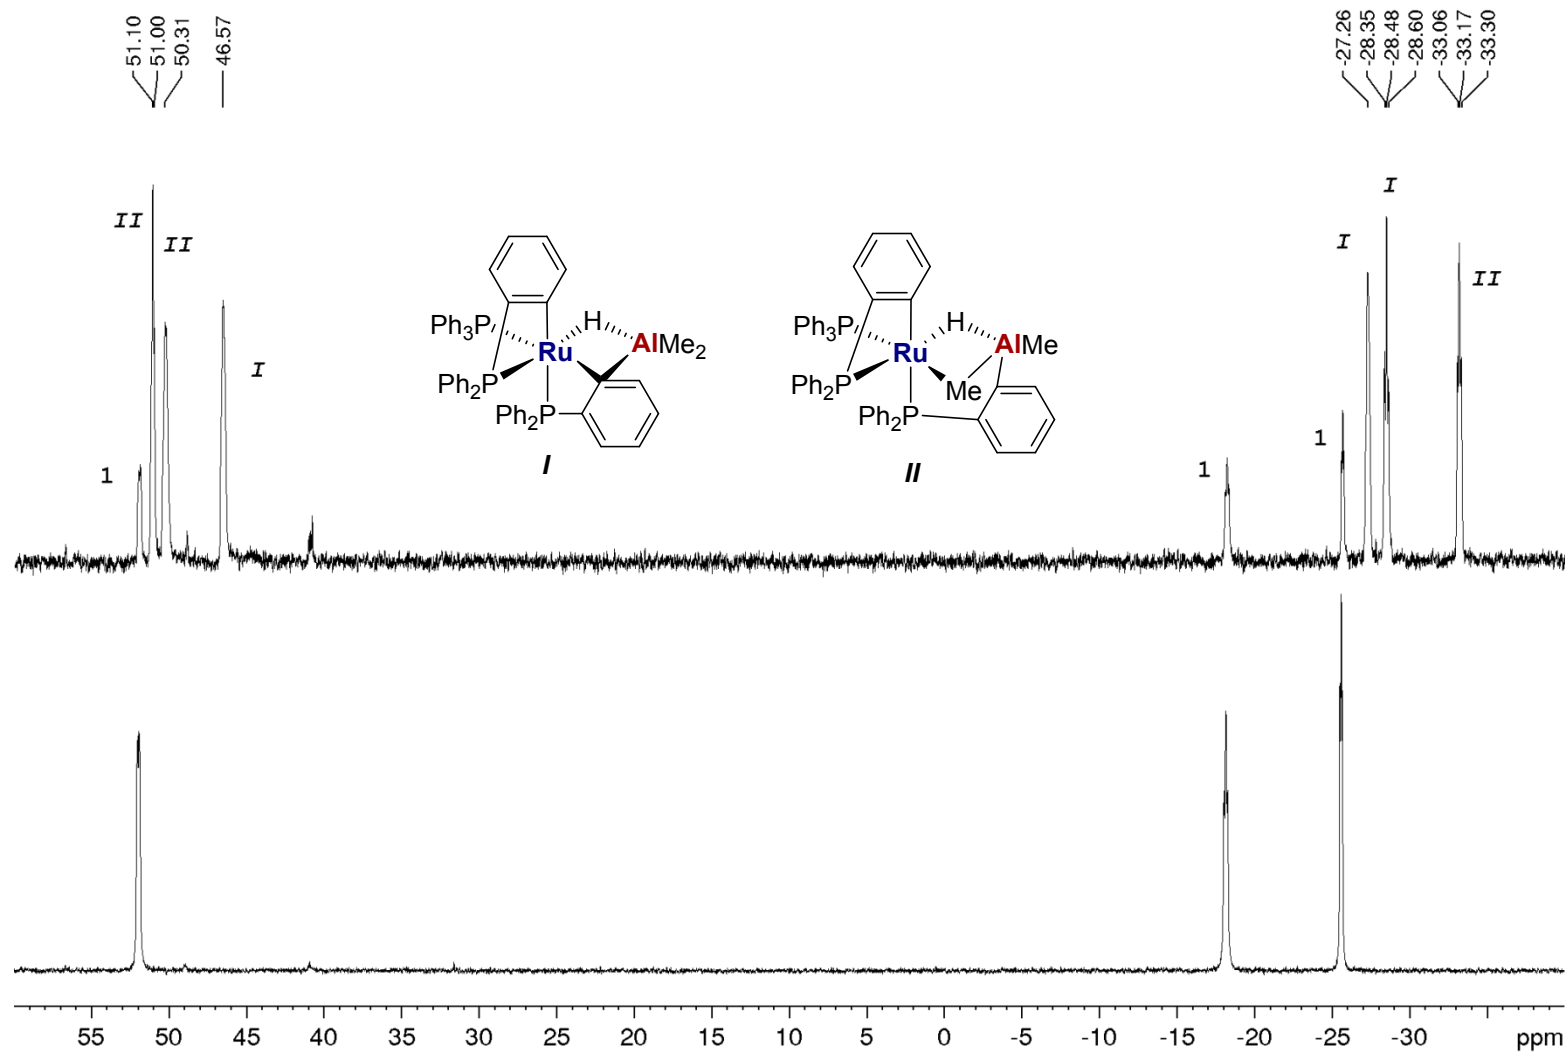

**Figure S9.**  $^{31}\text{P}\{^1\text{H}\}$  NMR spectrum (162 MHz, THF-*d*<sub>8</sub>, 193 K) of (bottom) **1** and (top) intermediates *I* and *II* formed upon addition of Me<sub>2</sub>AlCl (15 min at 193 K).

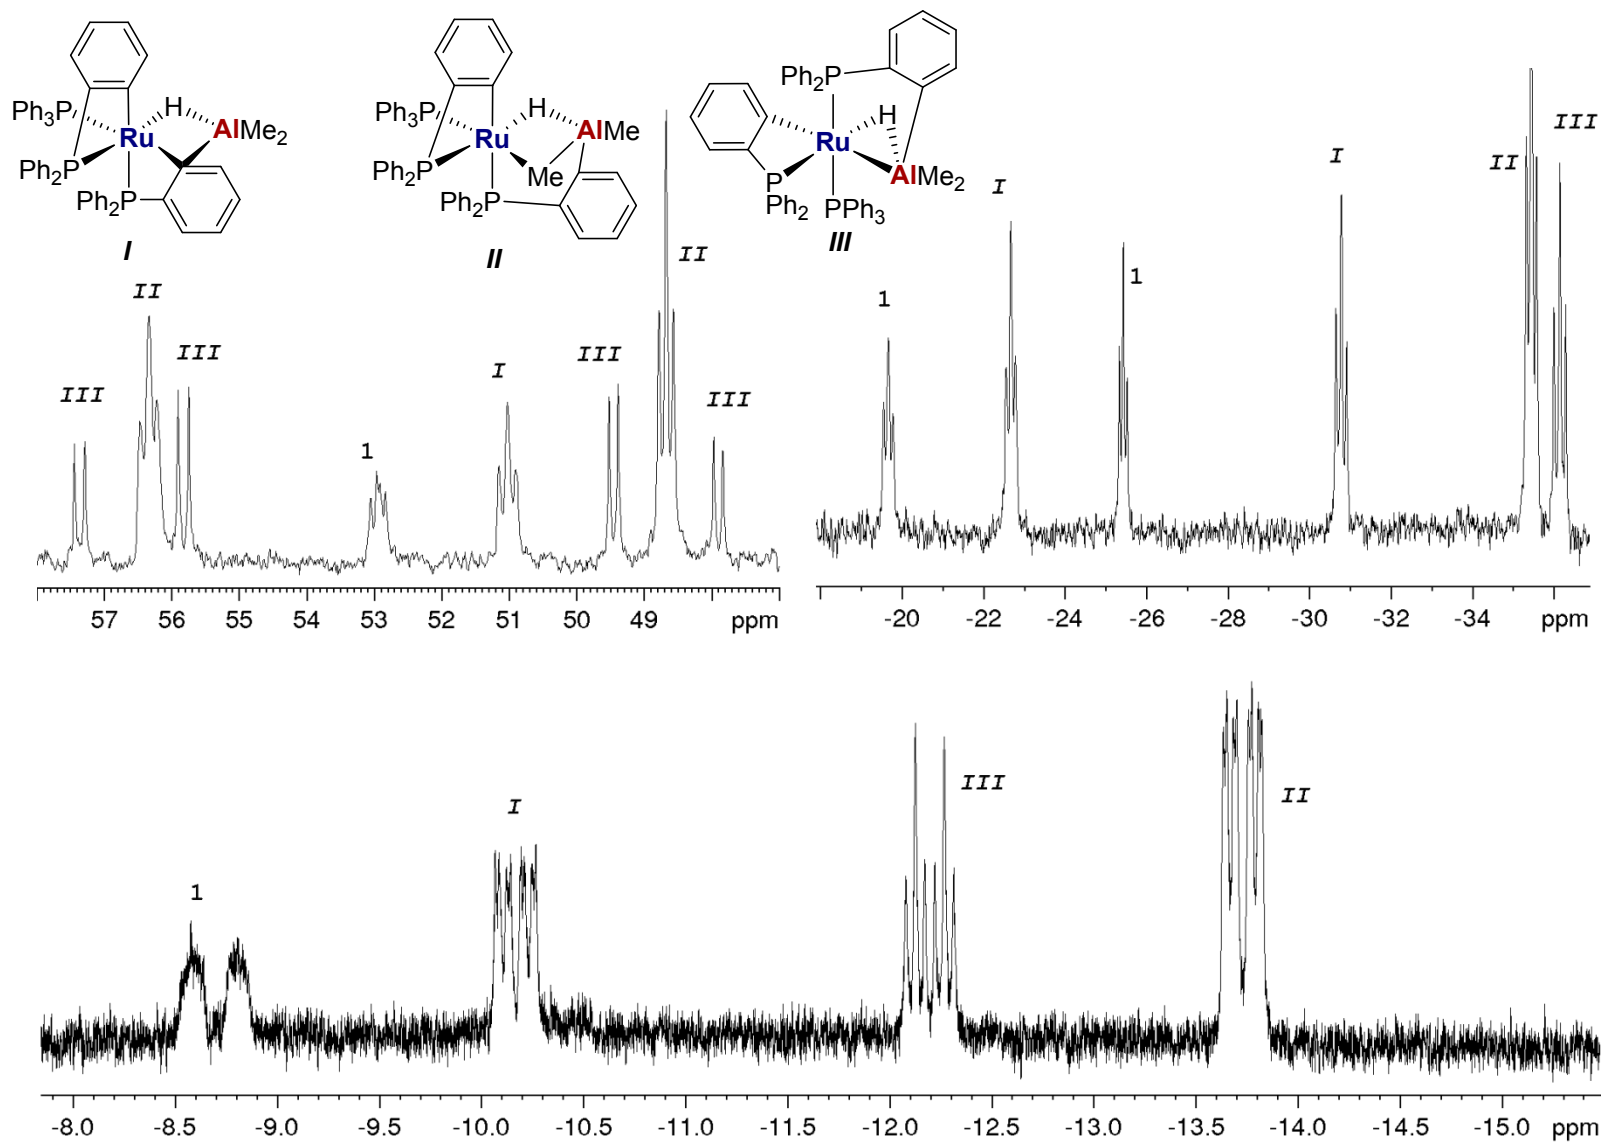

**Figure S10.** (Bottom) Hydride region of the  $^1\text{H}$  NMR spectrum (400 MHz,  $\text{THF-}d_8$ ) and (top)  $^{31}\text{P}\{^1\text{H}\}$  NMR spectrum (162 MHz,  $\text{THF-}d_8$ ) of the reaction of **1** and  $\text{Me}_2\text{AlCl}$  recorded after 1 h at 233 K showing the presence of intermediates **I-III**.

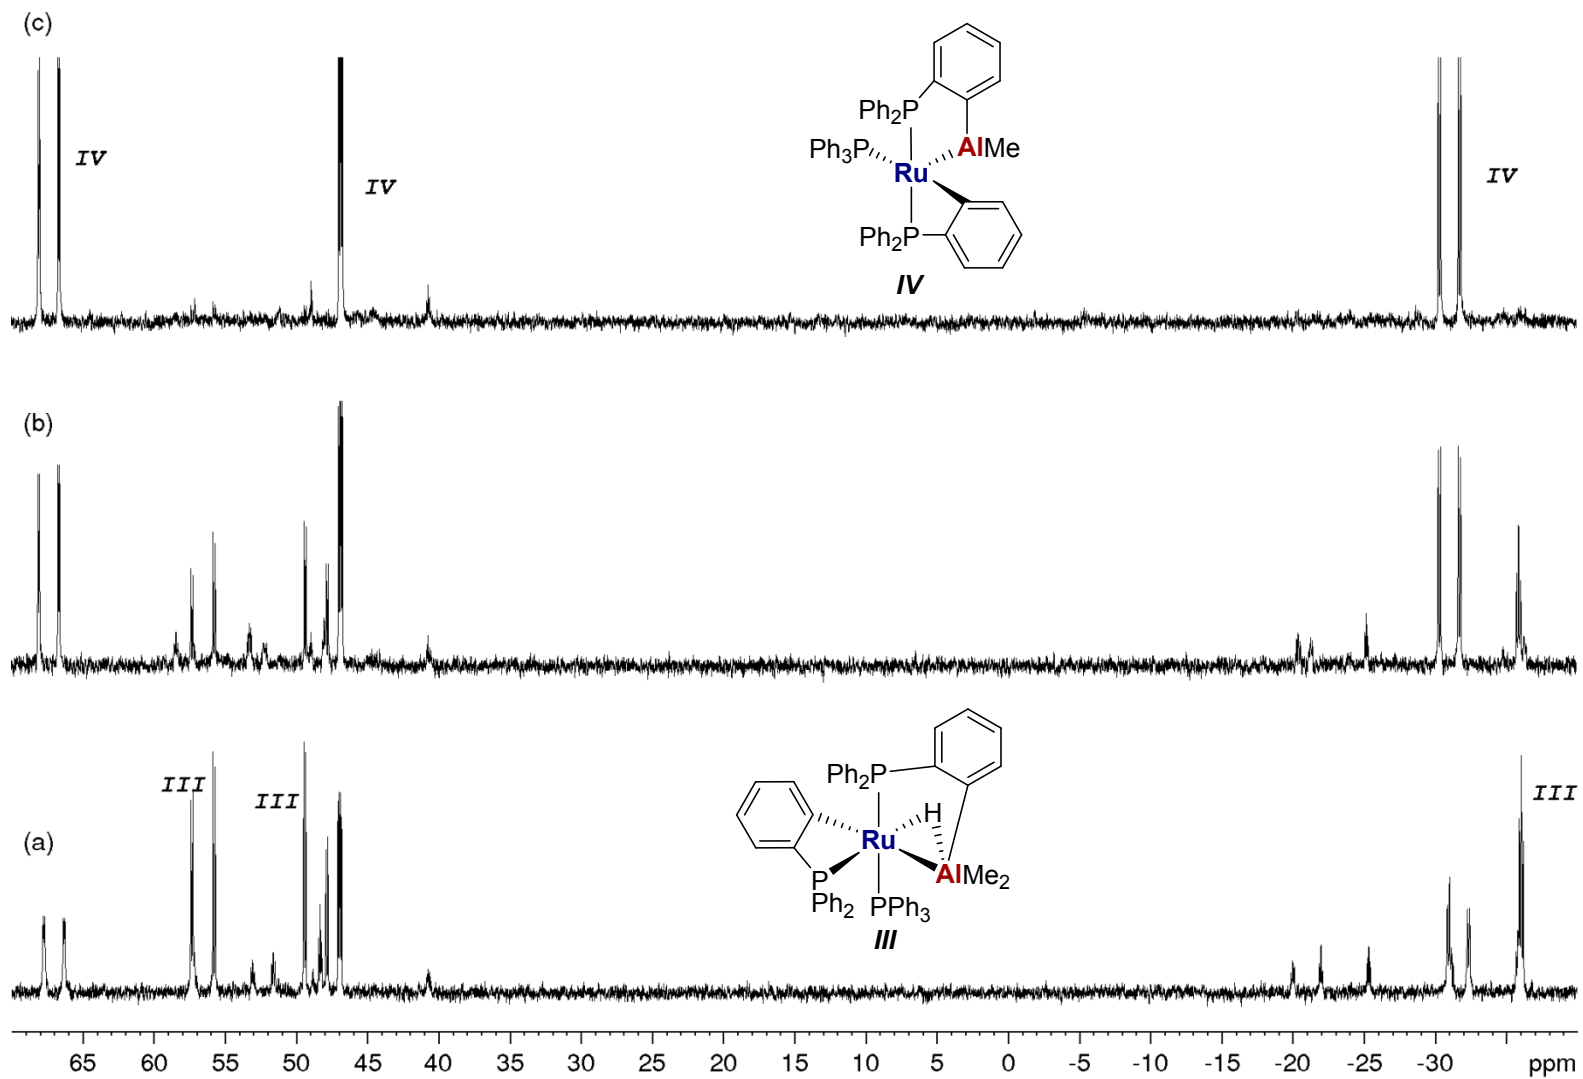

**Figure S11.**  $^{31}\text{P}\{^1\text{H}\}$  NMR spectra (162 MHz,  $\text{THF-}d_8$ ) of intermediates **III** and **IV** formed upon 193 K addition of  $\text{Me}_2\text{AlCl}$  to **1**. Spectra recorded (a) after leaving for 2 h at 253 K, (b) 15 min at 273 K and (c) 1 h at 273 K.



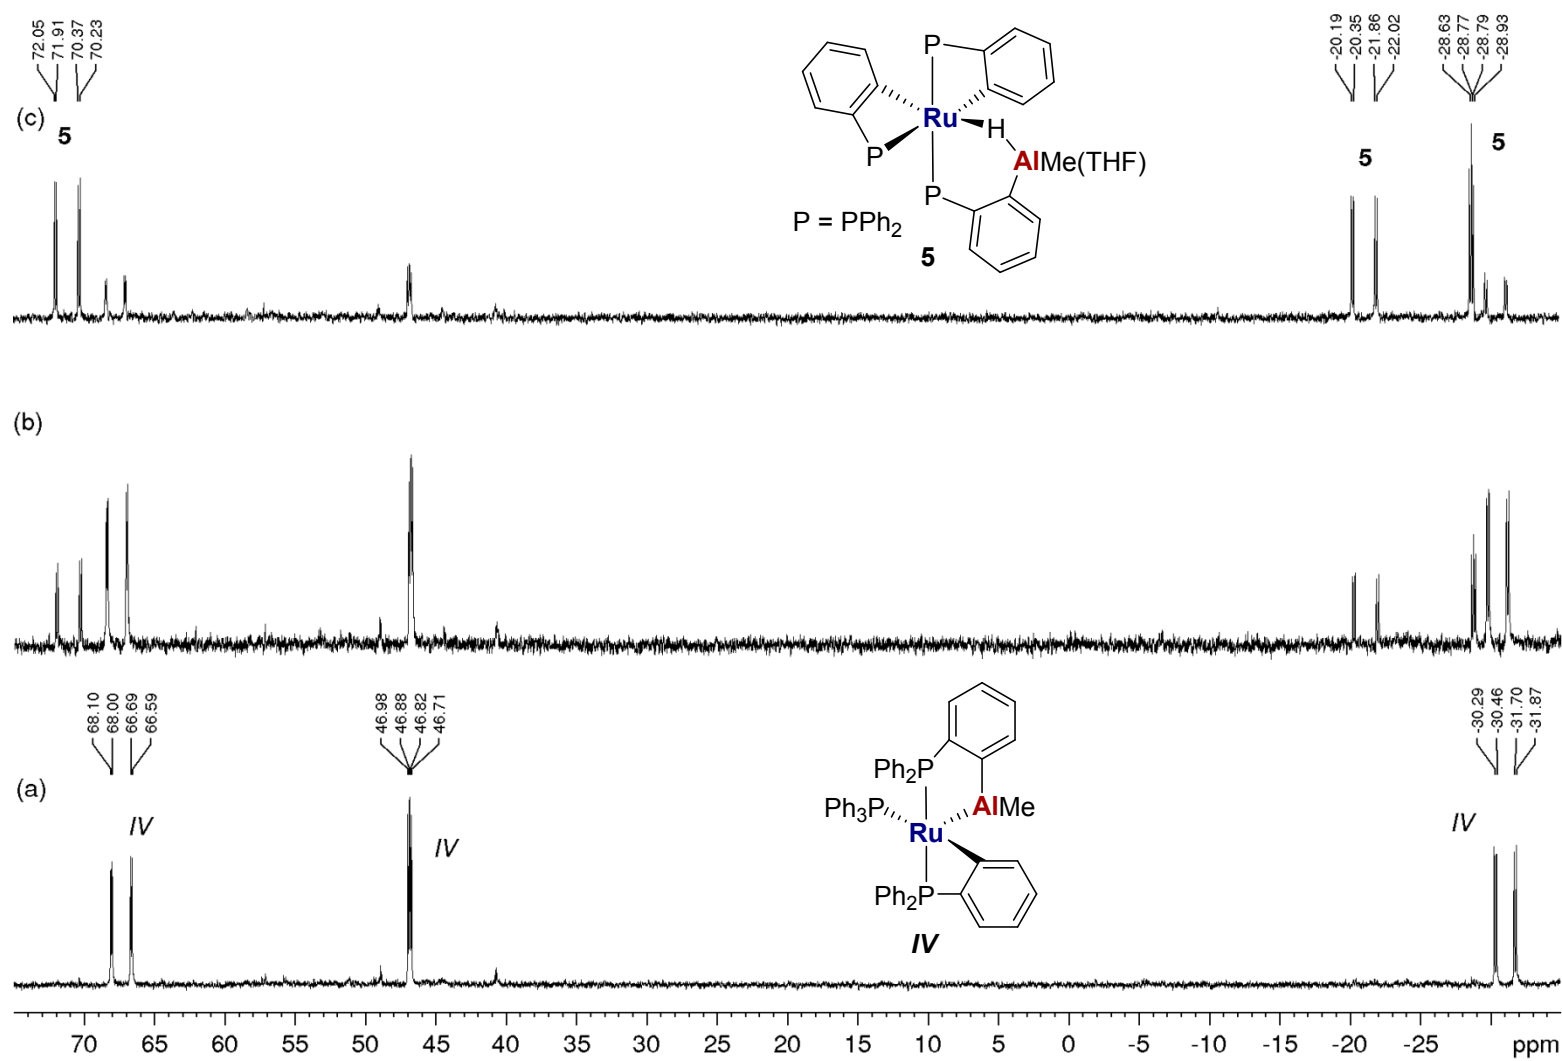

**Figure S12.**  $^{31}\text{P}\{^1\text{H}\}$  NMR spectra (162 MHz,  $\text{THF-}d_8$ ) of the 193 K reaction of  $\text{Me}_2\text{AlCl}$  with **1** showing the conversion of intermediate **IV** to **5**. Spectra recorded (a) at 273 K, (b) after 15 min at 298 K and (c) after 45 min at 298 K.

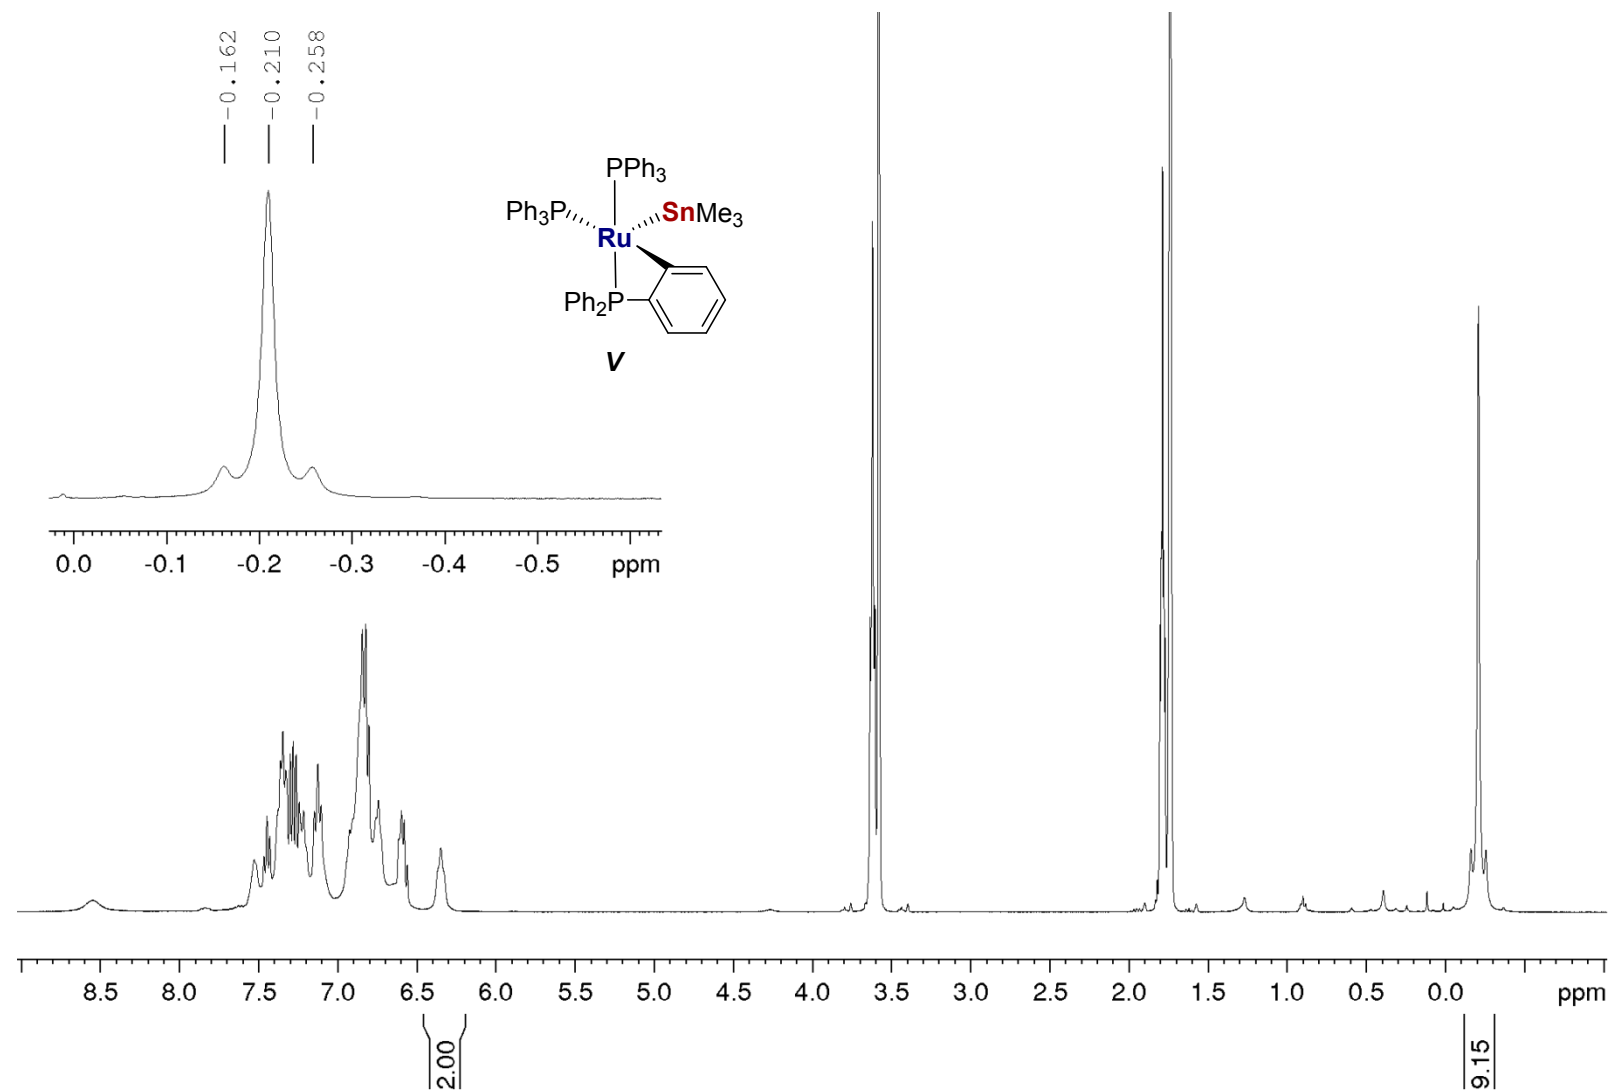

**Figure S13.**  $^1\text{H}$  NMR spectrum (400 MHz,  $\text{THF-}d_8$ , 193 K) of the reaction of **1** with  $\text{Me}_3\text{SnCl}$  to give intermediate **V**. Inset shows expansion of the  $\text{SnMe}_3$  signal.

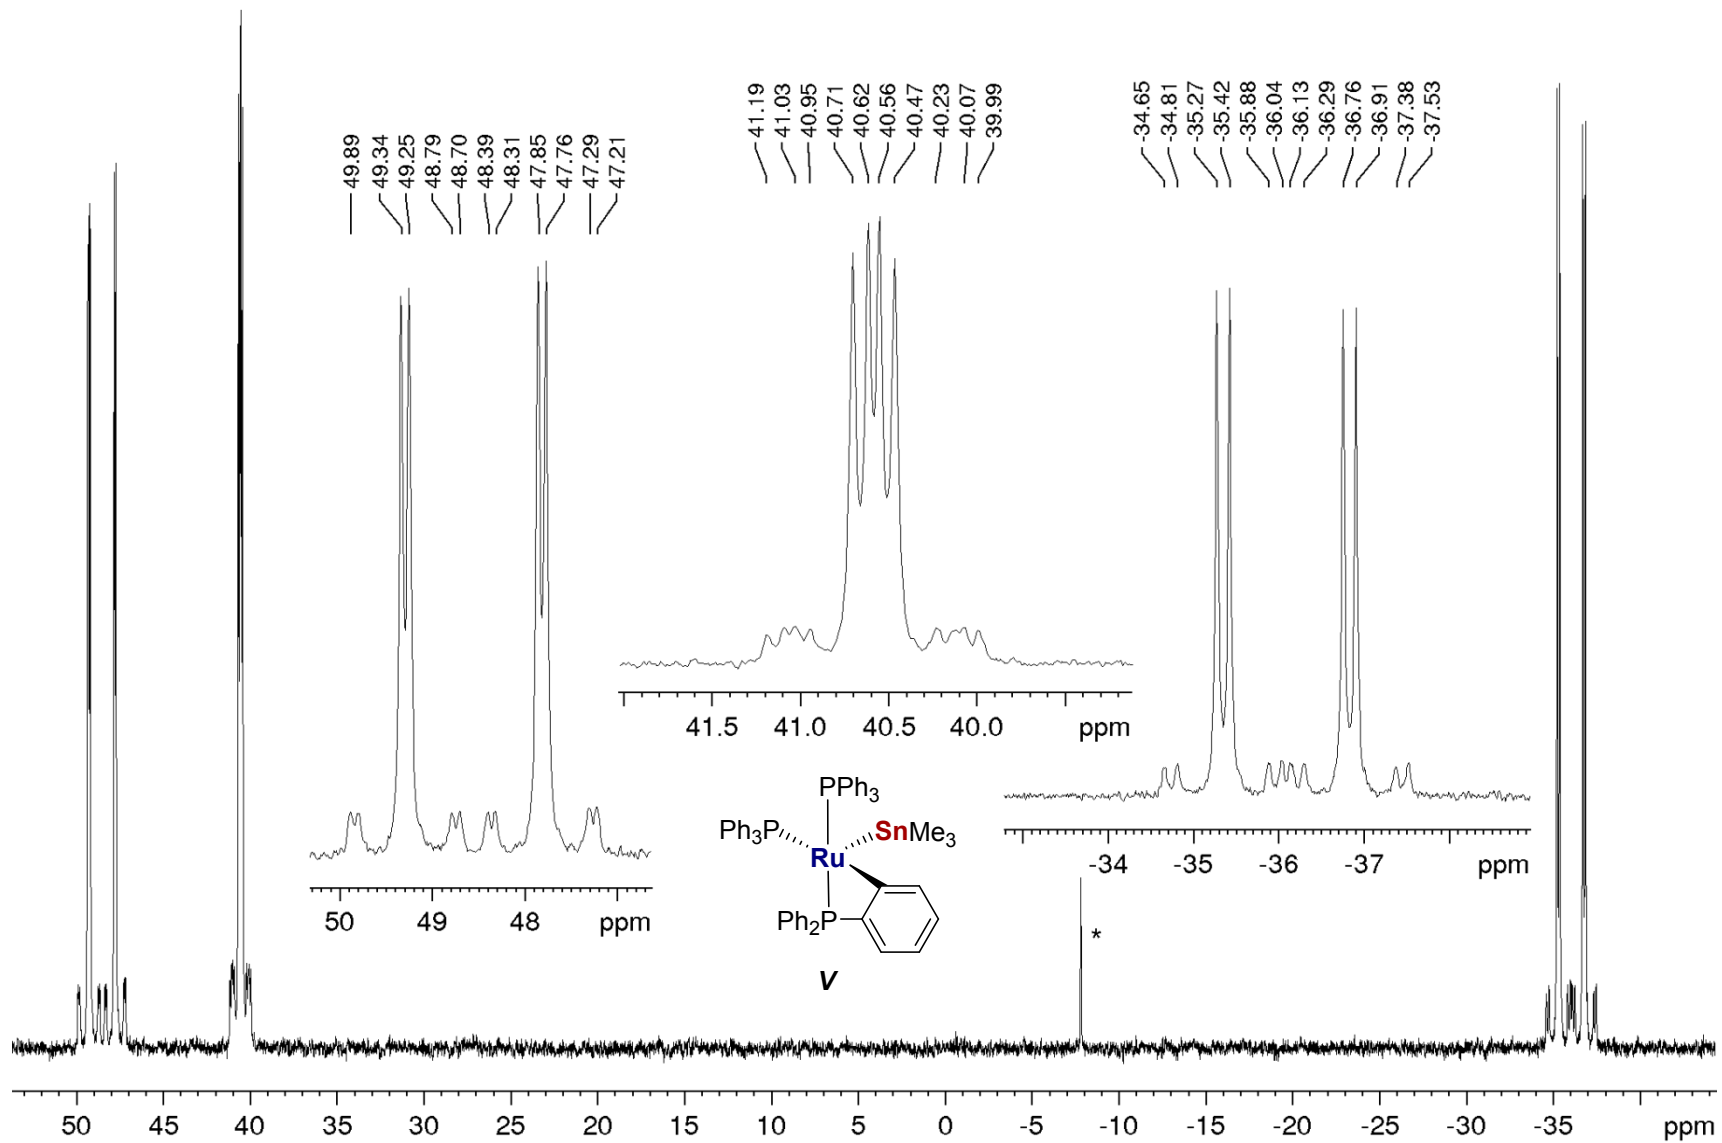

**Figure S14.**  $^{31}\text{P}\{^1\text{H}\}$  NMR spectrum (162 MHz,  $\text{THF-}d_8$ , 193 K) of the reaction of **1** with  $\text{Me}_3\text{SnCl}$  to give intermediate *V*. Insets show expansions of the three resonances. \* =  $\text{PPh}_3$ .

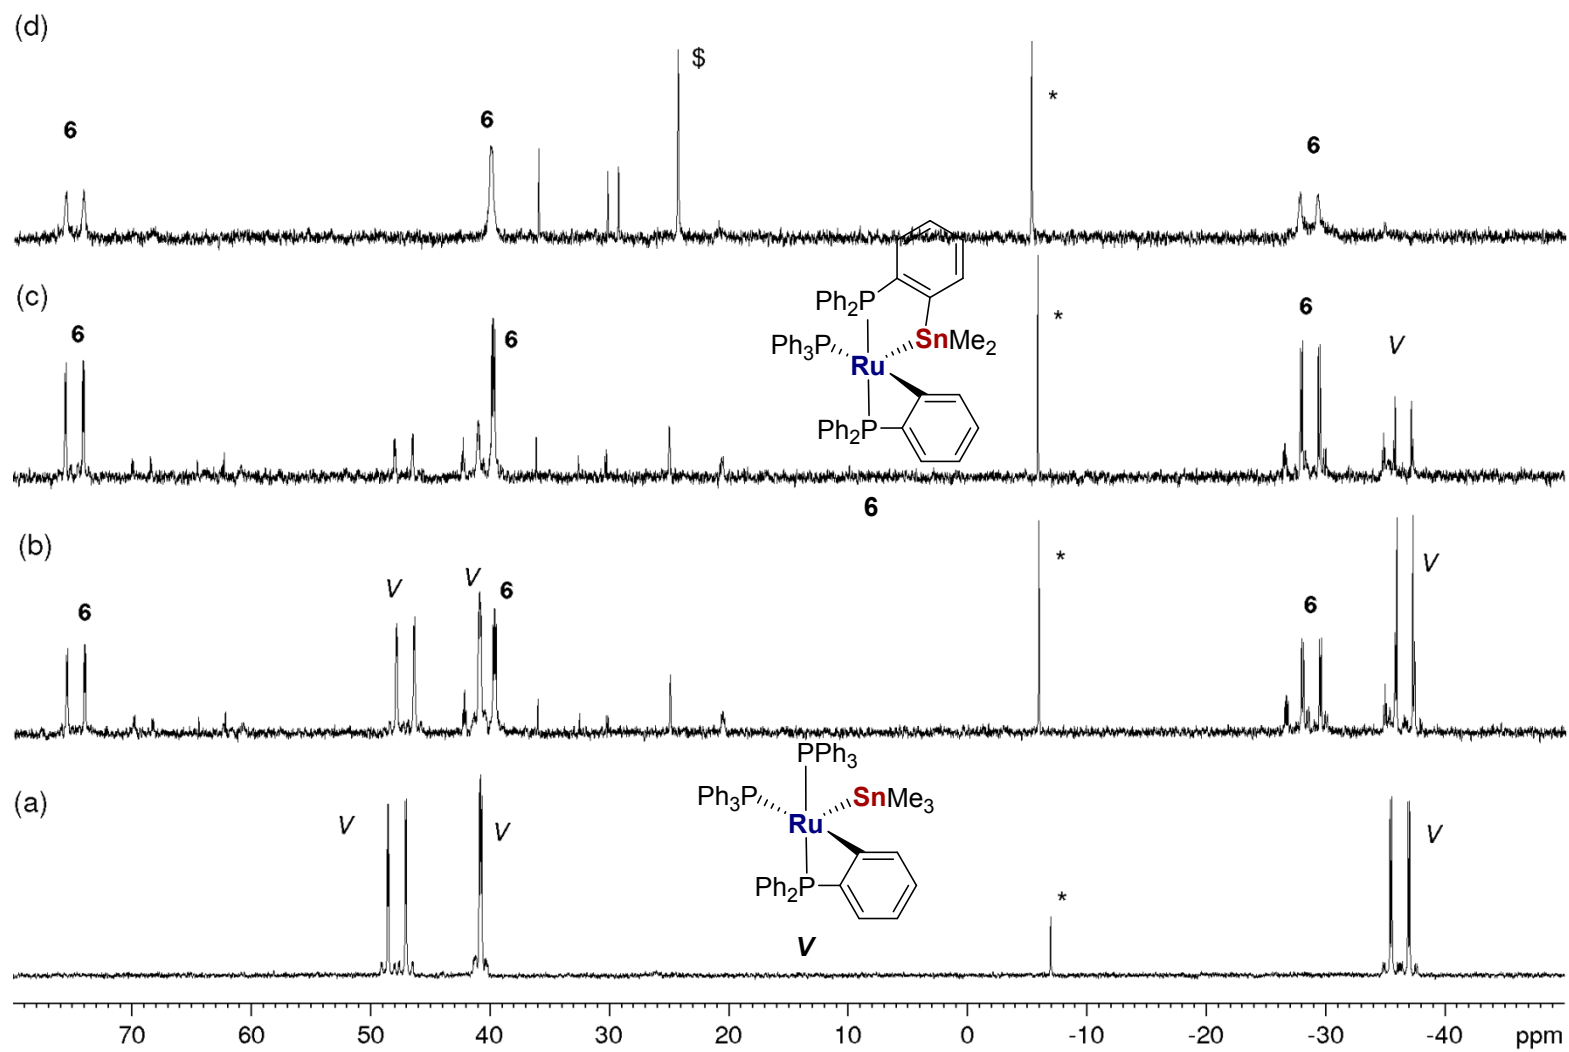

**Figure S15.**  $^{31}\text{P}\{^1\text{H}\}$  NMR spectra (162 MHz,  $\text{THF-}d_8$ ) of the reaction of **1** with  $\text{Me}_3\text{SnCl}$  at 193 K. (a) Spectrum (233 K) showing presence of **V**, at 273 K for (b) 5 min and (c) 30 min with transformation of **V** to **6** and (d) at 298 K. \* =  $\text{PPh}_3$ ;  $\text{\$}$  =  $\text{OPPh}_3$ .

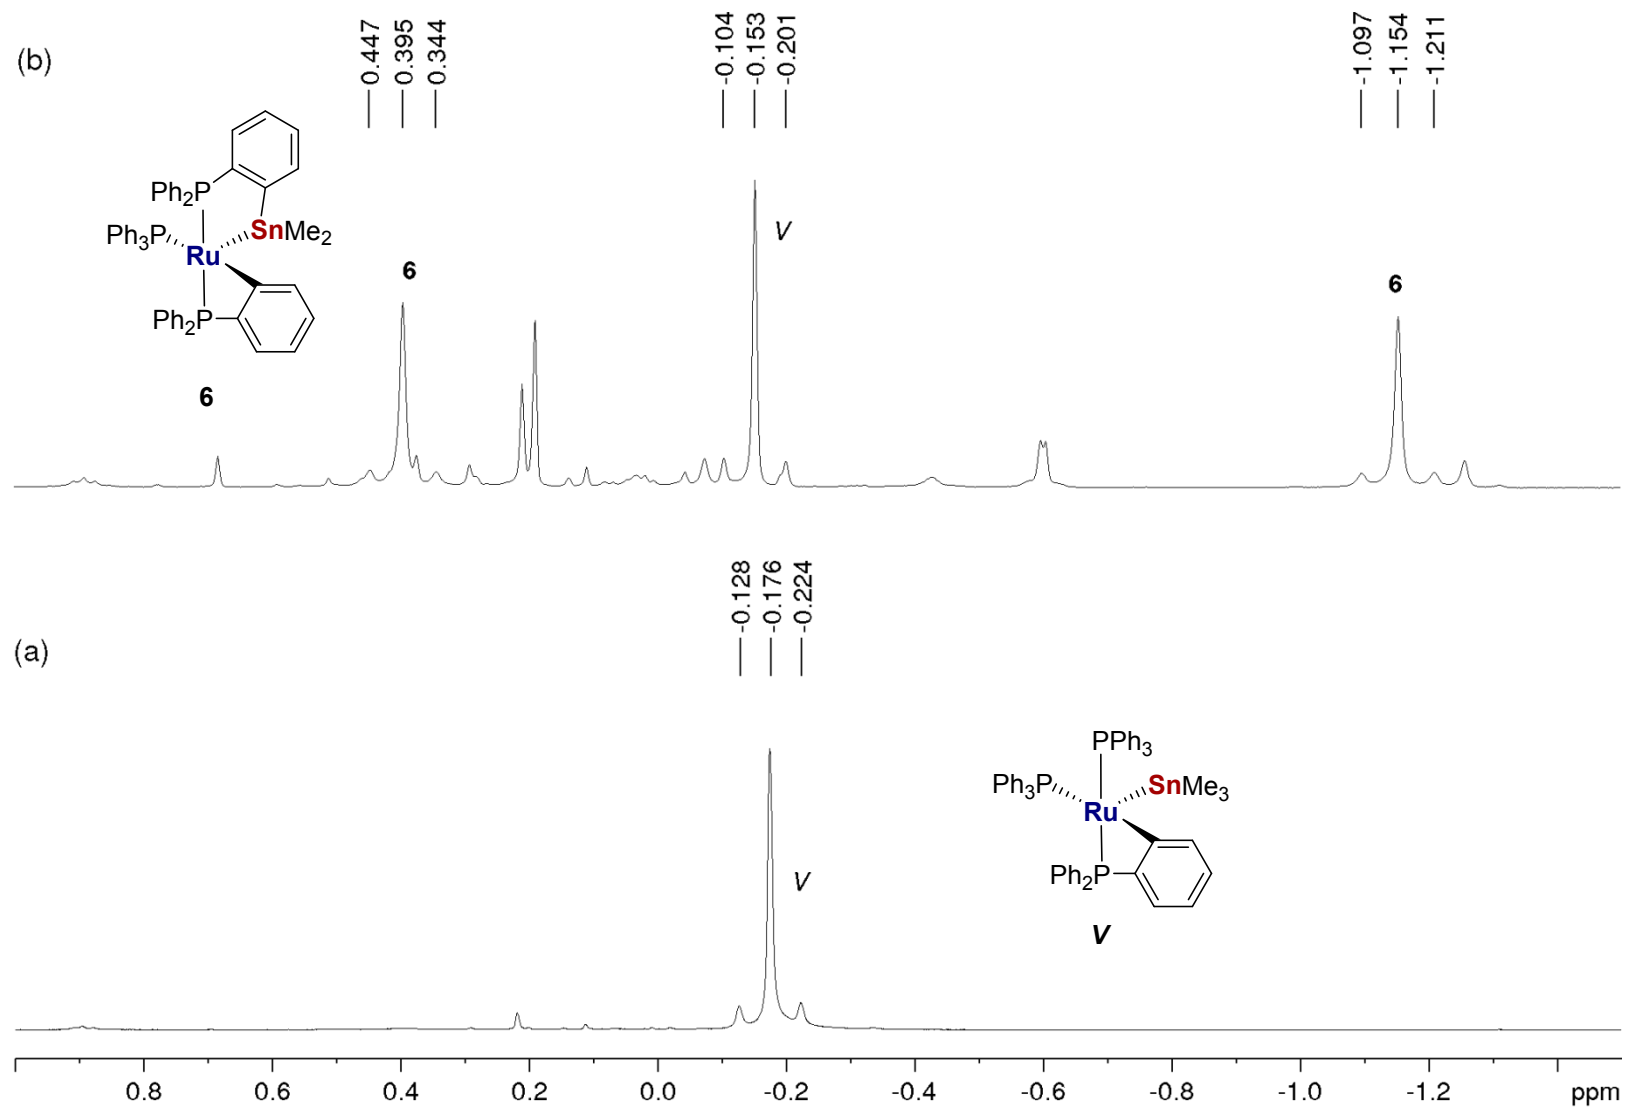

**Figure S16.** Partial  $^1\text{H}$  NMR spectra (400 MHz,  $\text{THF-}d_8$ ) of the reaction of **1** with  $\text{Me}_3\text{SnCl}$  at 193 K showing (a)  $\text{SnMe}_3$  signal of **V** at 233 K and (b) appearance of the two resonances of the  $\text{SnMe}_2$  group of **6** upon warming to 273 K.

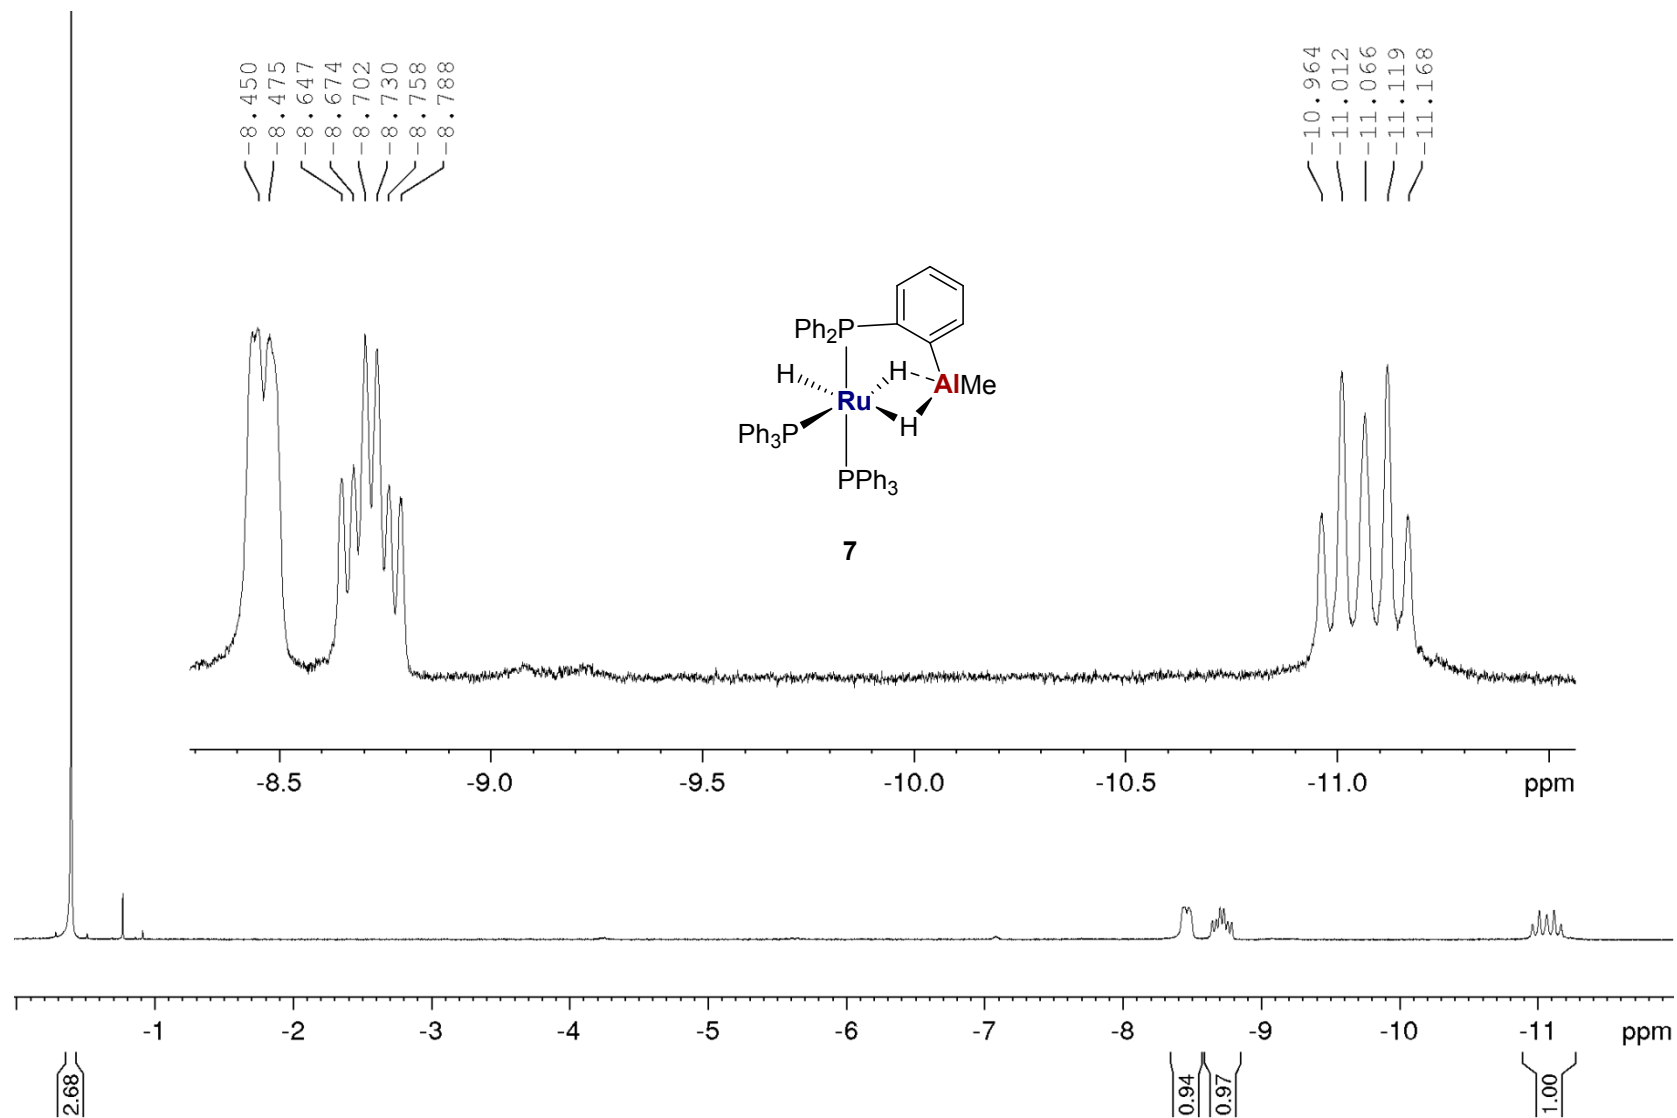

**Figure S17.** Low frequency region of the  $^1\text{H}$  NMR spectrum (500 MHz,  $\text{C}_6\text{D}_6$ , 298 K) from the reaction of  $[\text{Ru}(\text{C}_6\text{H}_4\text{PPh}_2)_2\{\text{PPh}_2\text{C}_6\text{H}_4\text{AlMe}(\text{THF})\}\text{H}]$  **5** with  $\text{H}_2$  at 60 °C to give  $[\text{Ru}(\text{PPh}_3)_2\{\text{PPh}_2\text{C}_6\text{H}_4\text{AlMe}\}\text{H}_3]$  **7**, with expansion of the hydride signals.

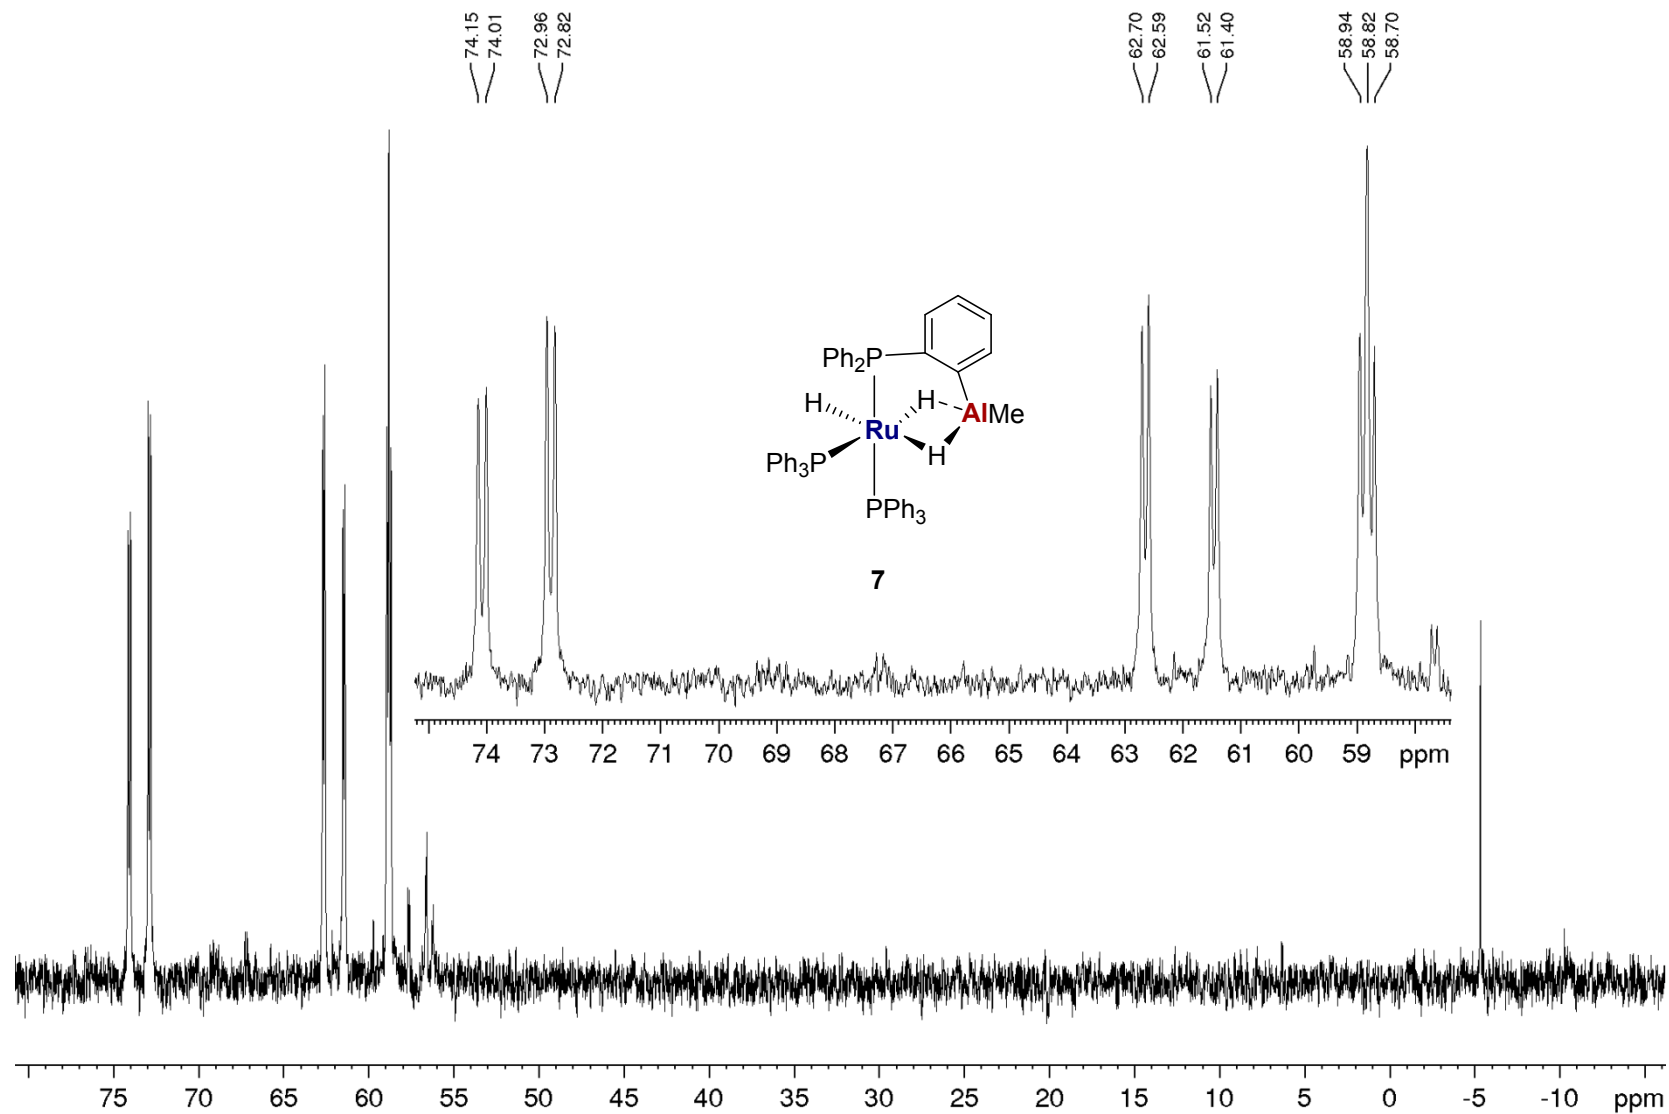

**Figure S18.**  $^{31}\text{P}\{^1\text{H}\}$  NMR spectrum (202 MHz,  $\text{C}_6\text{D}_6$ , 298 K) from the reaction of  $[\text{Ru}(\text{C}_6\text{H}_4\text{PPh}_2)_2\{\text{PPh}_2\text{C}_6\text{H}_4\text{AlMe}(\text{THF})\}\text{H}]$  **5** with  $\text{H}_2$  at 60 °C, with inset of the resonances assigned to the product  $[\text{Ru}(\text{PPh}_3)_2\{\text{PPh}_2\text{C}_6\text{H}_4\text{AlMe}\}\text{H}_3]$  **7**.

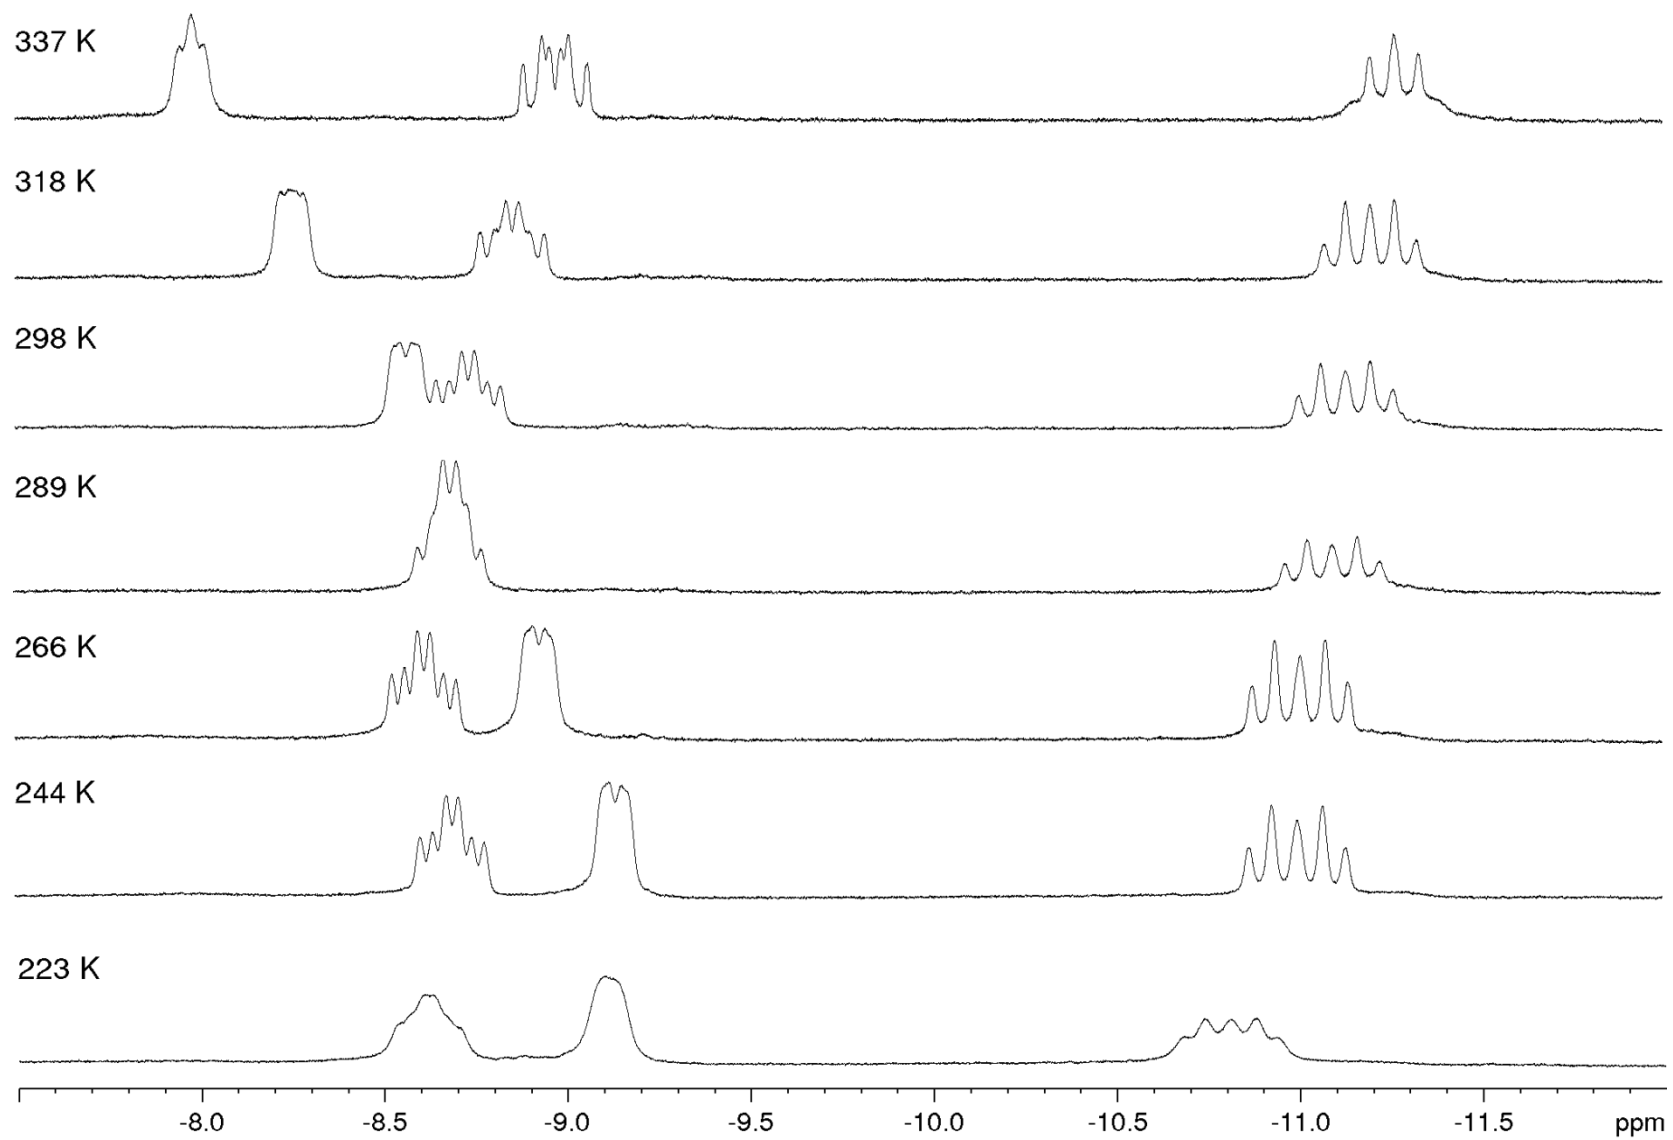



**Figure S19.** Hydride region of the variable temperature  $^1\text{H}$  NMR spectra (400 MHz,  $\text{C}_6\text{D}_5\text{CD}_3$ ) of  $[\text{Ru}(\text{PPh}_3)_2\{\text{PPh}_2\text{C}_6\text{H}_4\text{AlMe}\}\text{H}_3]$  **7**.

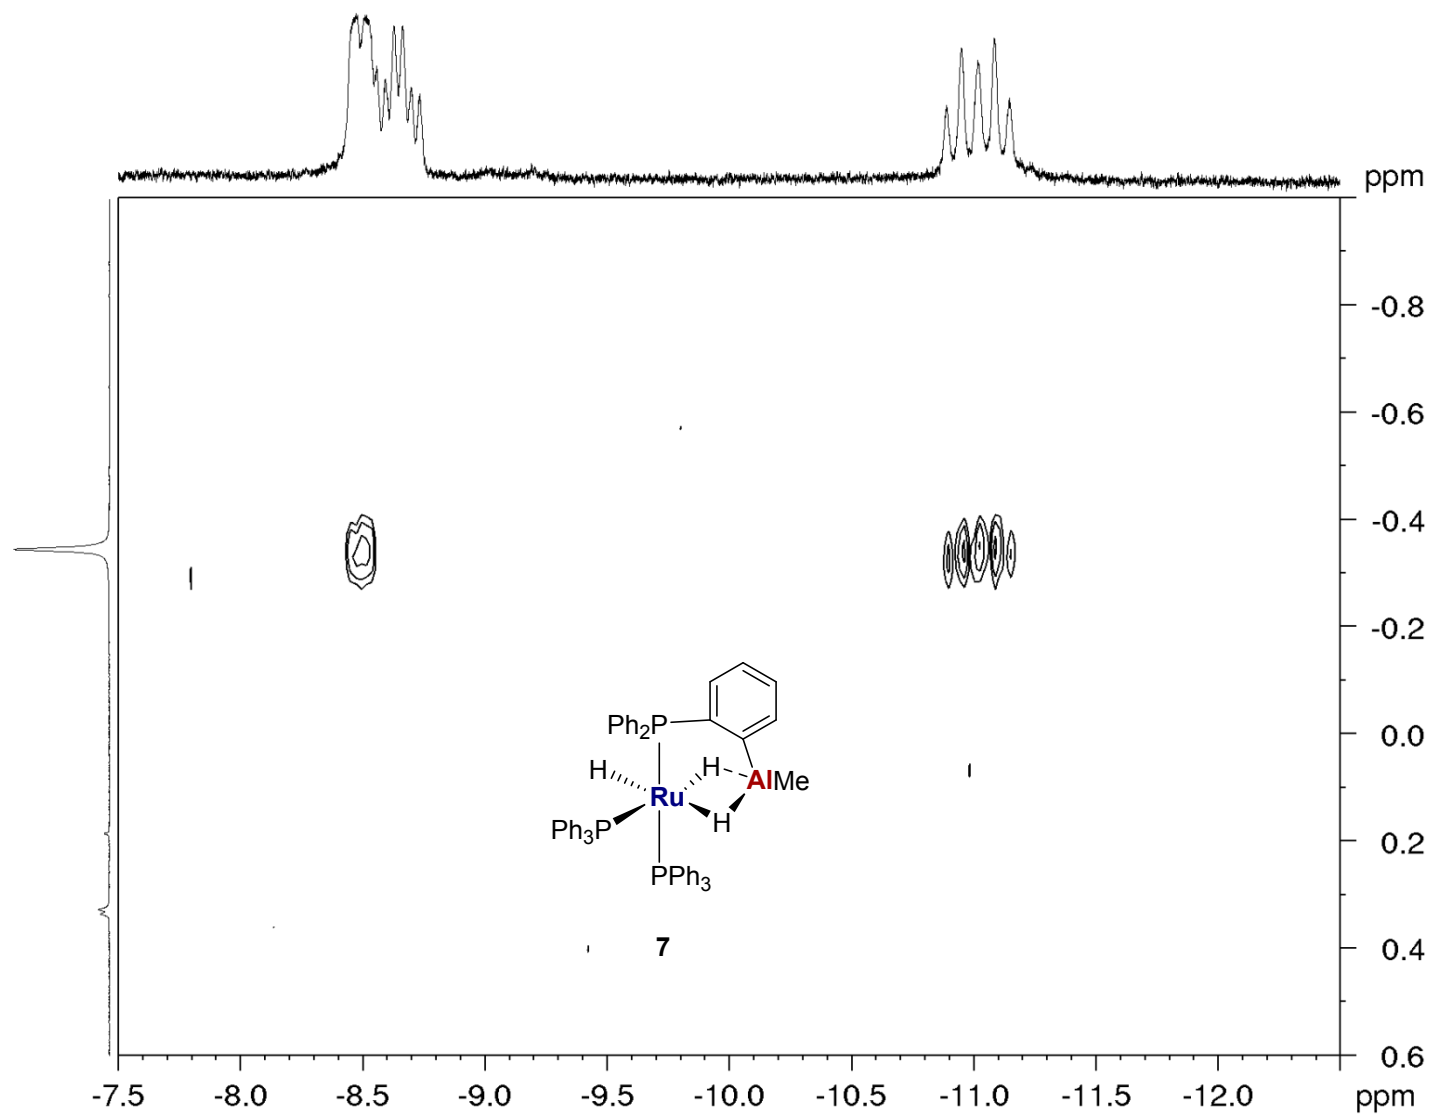

**Figure S20.** NOESY spectrum (400 MHz, C<sub>6</sub>D<sub>6</sub>) showing correlation between AlMe and two of the hydride resonances in [Ru(PPh<sub>3</sub>)<sub>2</sub>{PPh<sub>2</sub>C.  
6H<sub>4</sub>AlMe}H<sub>3</sub>] 7.

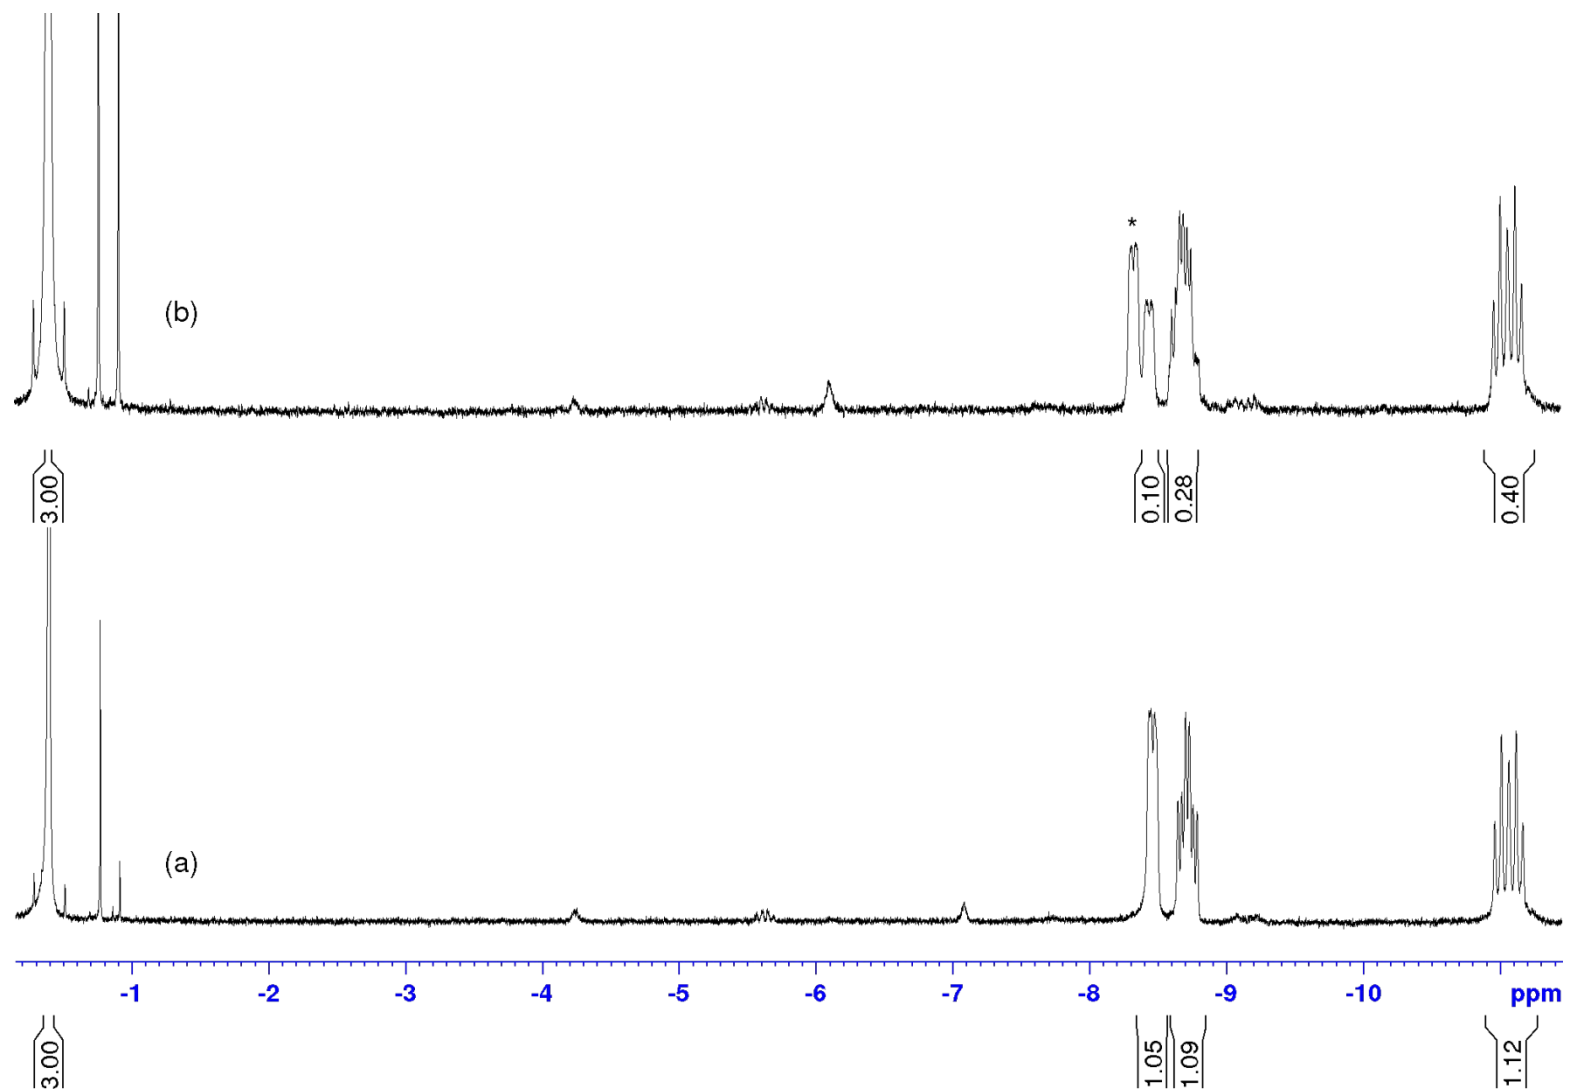

**Figure S21.** Low frequency region of the  $^1\text{H}$  NMR spectrum (500 MHz,  $\text{C}_6\text{D}_6$ , 298 K) from the reaction of  $[\text{Ru}(\text{C}_6\text{H}_4\text{PPh}_2)_2\{\text{PPh}_2\text{C}_6\text{H}_4\text{AlMe}(\text{THF})\}\text{H}]$  **5** at 60 °C with (a)  $\text{H}_2$  and (b)  $\text{D}_2$ . Hydride integrals relative to 3H signal of *AlMe*. \* = unknown signal.

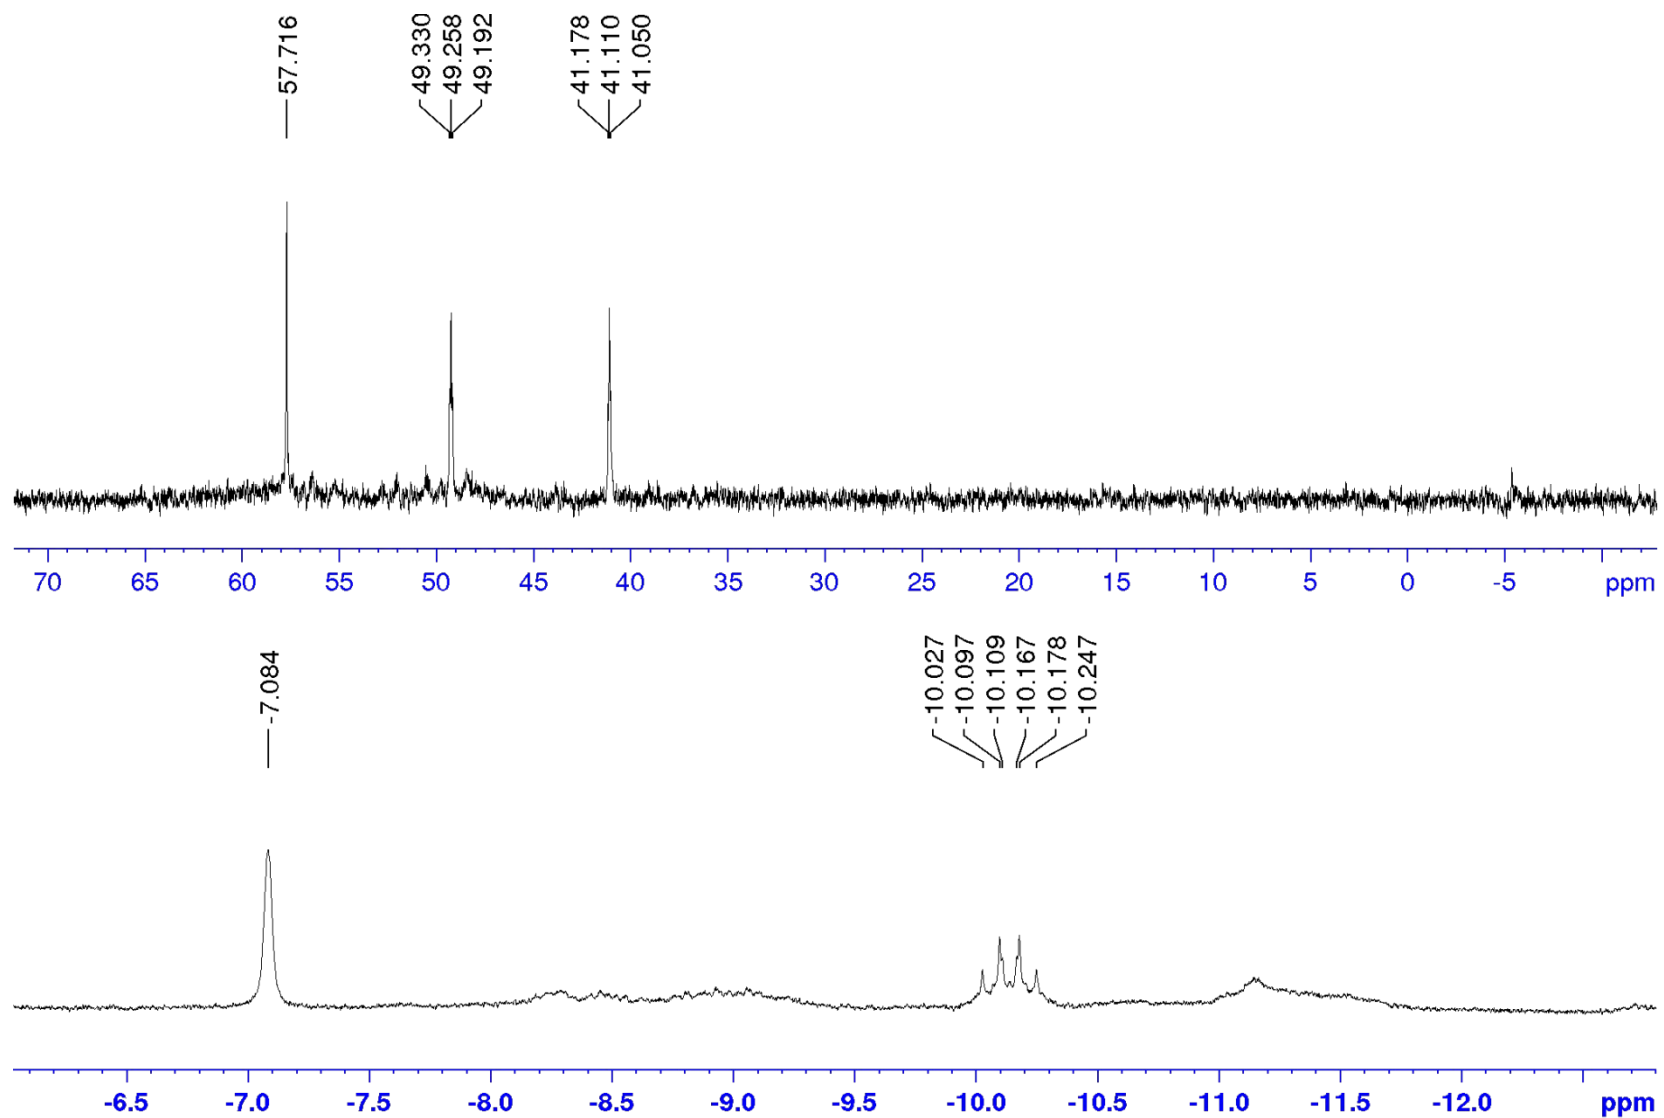

**Figure S22.**  $^1\text{H}$  (bottom) and  $^{31}\text{P}\{^1\text{H}\}$  (top) NMR spectra (500/202 MHz,  $\text{C}_6\text{D}_6$ , 298 K) following removal of  $\text{H}_2$  from a sample of  $[\text{Ru}(\text{PPh}_3)_2\{\text{PPh}_2\text{C}_6\text{H}_4\text{AlMe}\}\text{H}_3]$  **7** to give signals corresponding to  $[\text{Ru}(\text{PPh}_3)_3(\eta^2\text{-H}_2)\text{H}_2]$  and  $[\text{Ru}(\text{PPh}_3)_4\text{H}_2]$ .

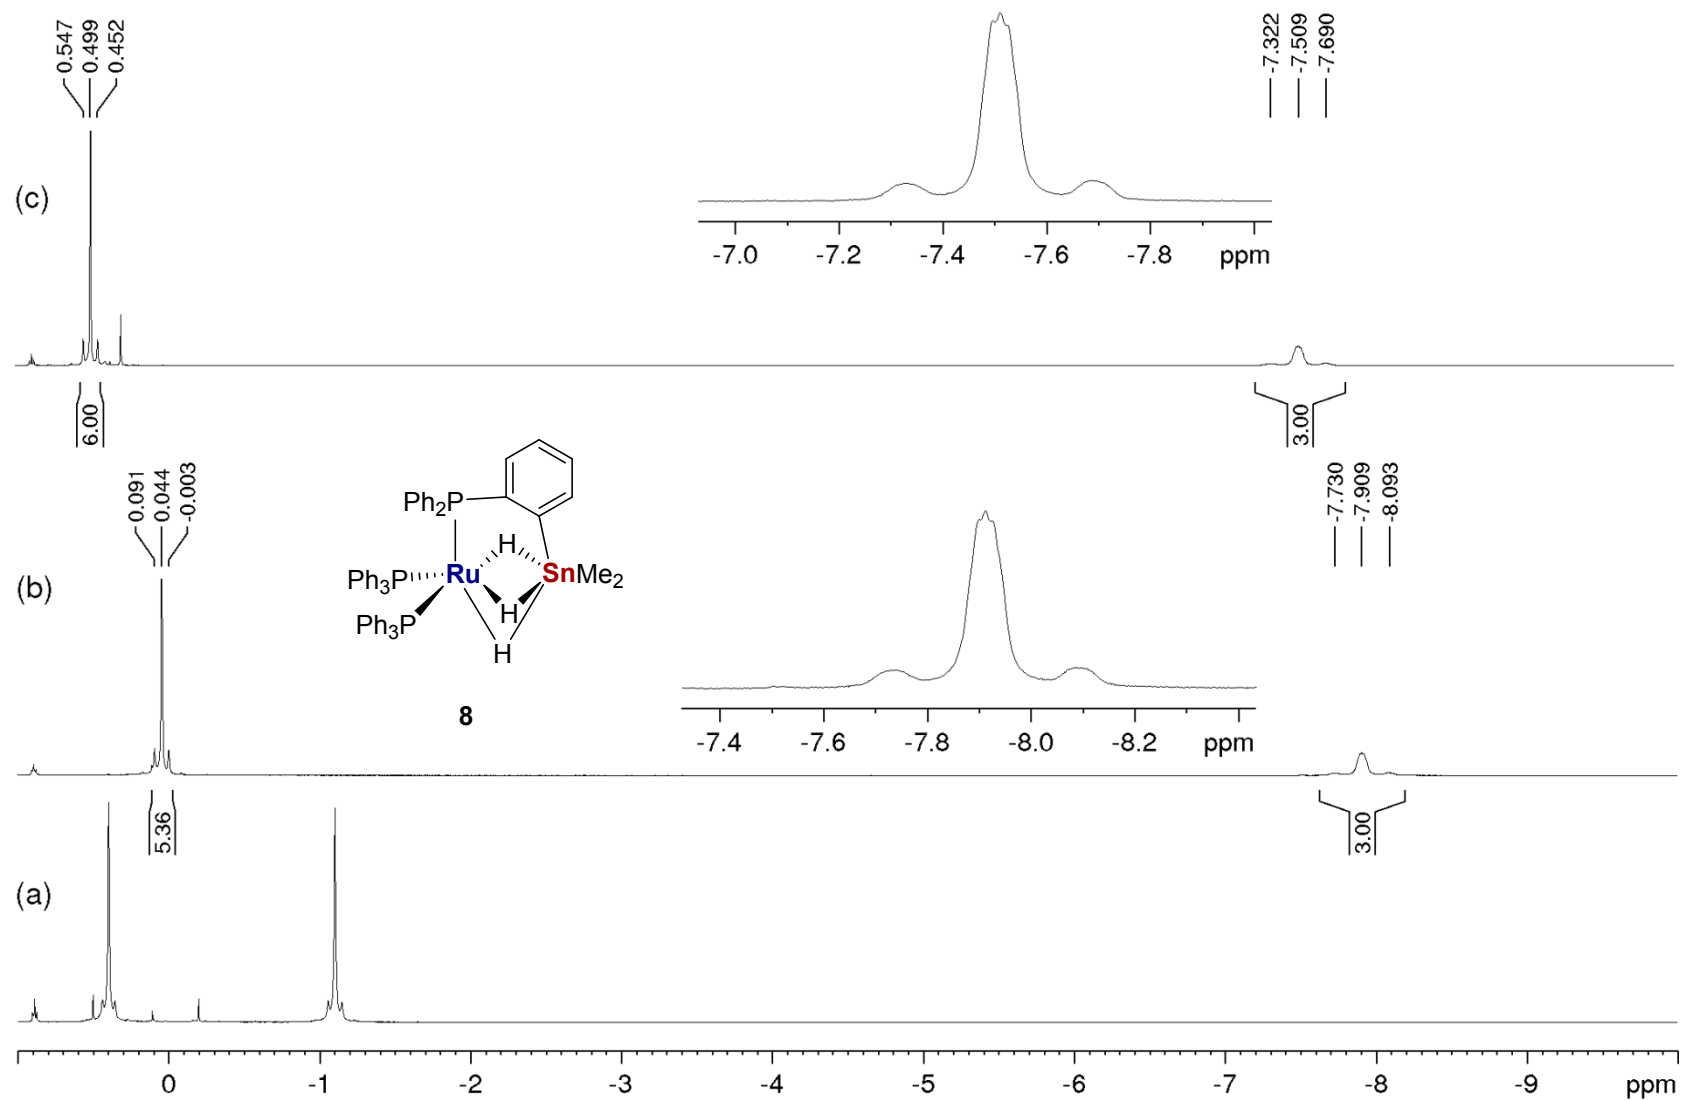

**Figure S23.** Low frequency region of the  $^1\text{H}$  NMR spectrum (500 MHz,  $\text{THF-}d_8$ , 298 K) of  $[\text{Ru}(\text{PPh}_3)(\text{C}_6\text{H}_4\text{PPh}_2)\{\text{PPh}_2\text{C}_6\text{H}_4\text{SnMe}_2\}]$  **6** (a) before and (b) 15 min after addition of 1 atm  $\text{H}_2$  to give **8**. (c) shows the same reaction occurs in  $\text{C}_6\text{D}_6$ . Samples were unshaken to avoid precipitation of **8**.

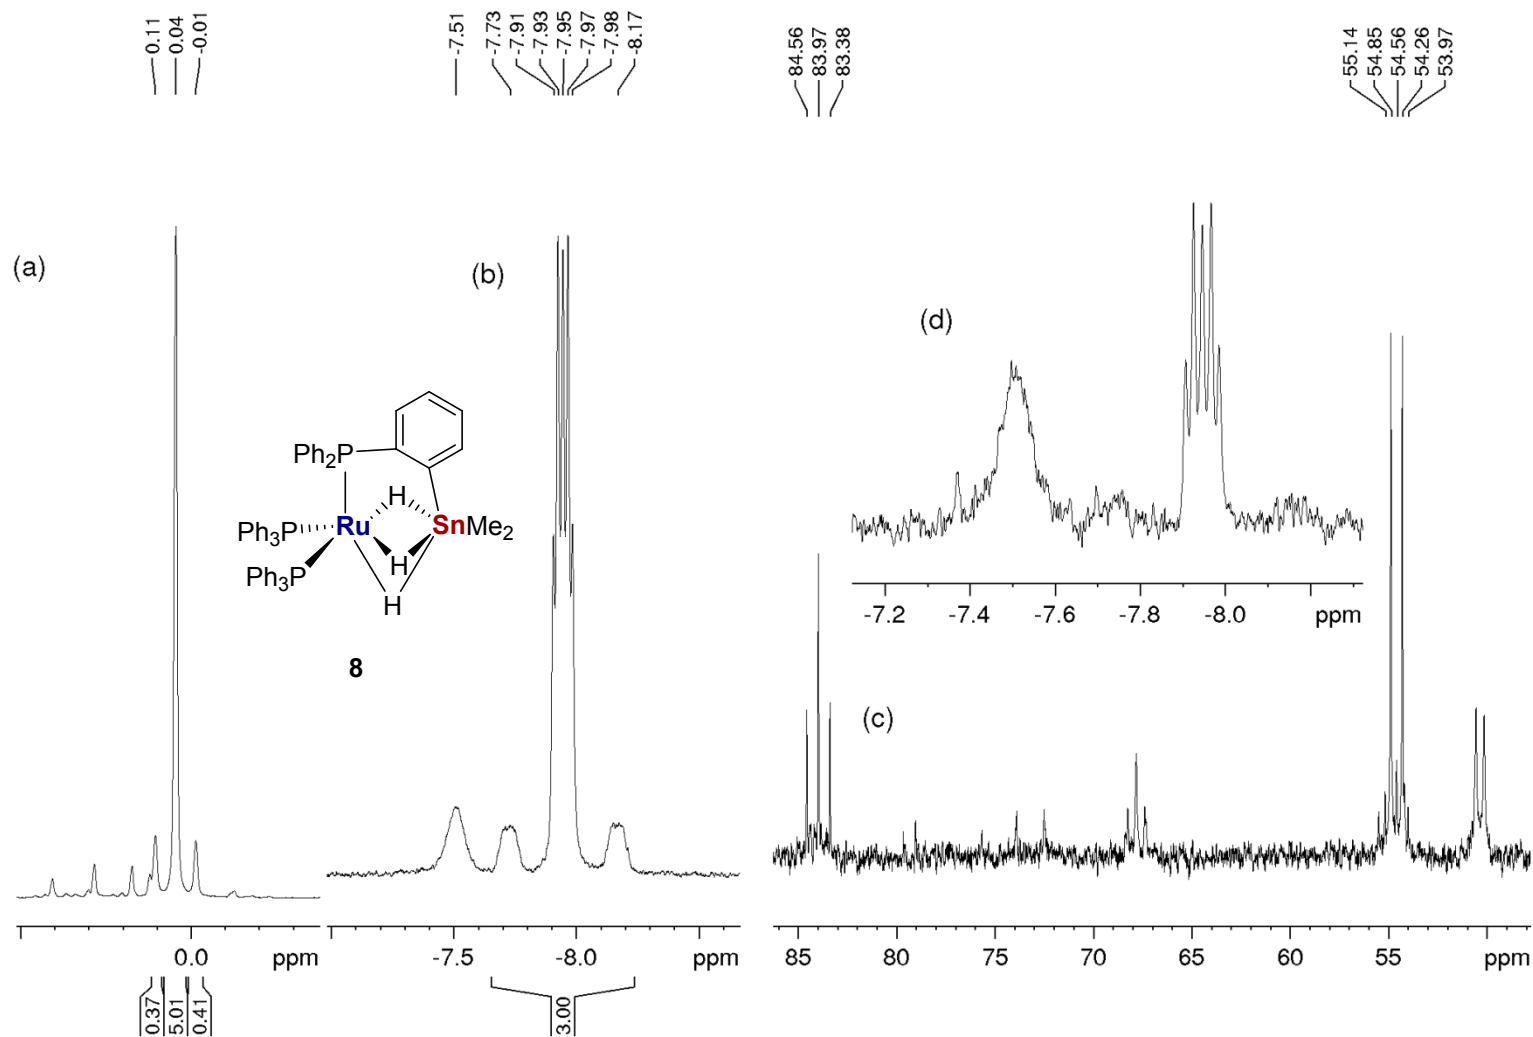

**Figure S24.**  $^1\text{H}$  (400 MHz, 332 K) and  $^{31}\text{P}\{^1\text{H}\}$  (162 MHz, 332 K) NMR spectra from reaction of  $[\text{Ru}(\text{PPh}_3)(\text{C}_6\text{H}_4\text{PPh}_2)\{\text{PPh}_2\text{C}_6\text{H}_4\text{SnMe}_2\}]$  **6** and 1 atm  $\text{H}_2$  in  $\text{THF}-d_8$ . (a)  $\text{SnMe}_2$ , (b)  $\text{RuH}_3$  and (c)  $^{31}\text{P}\{^1\text{H}\}$  signals of **8**. (d)  $^1\text{H}$  NMR evidence for degradation with growth of a new hydride signal at  $\delta$  -7.5 after overnight at 332 K.

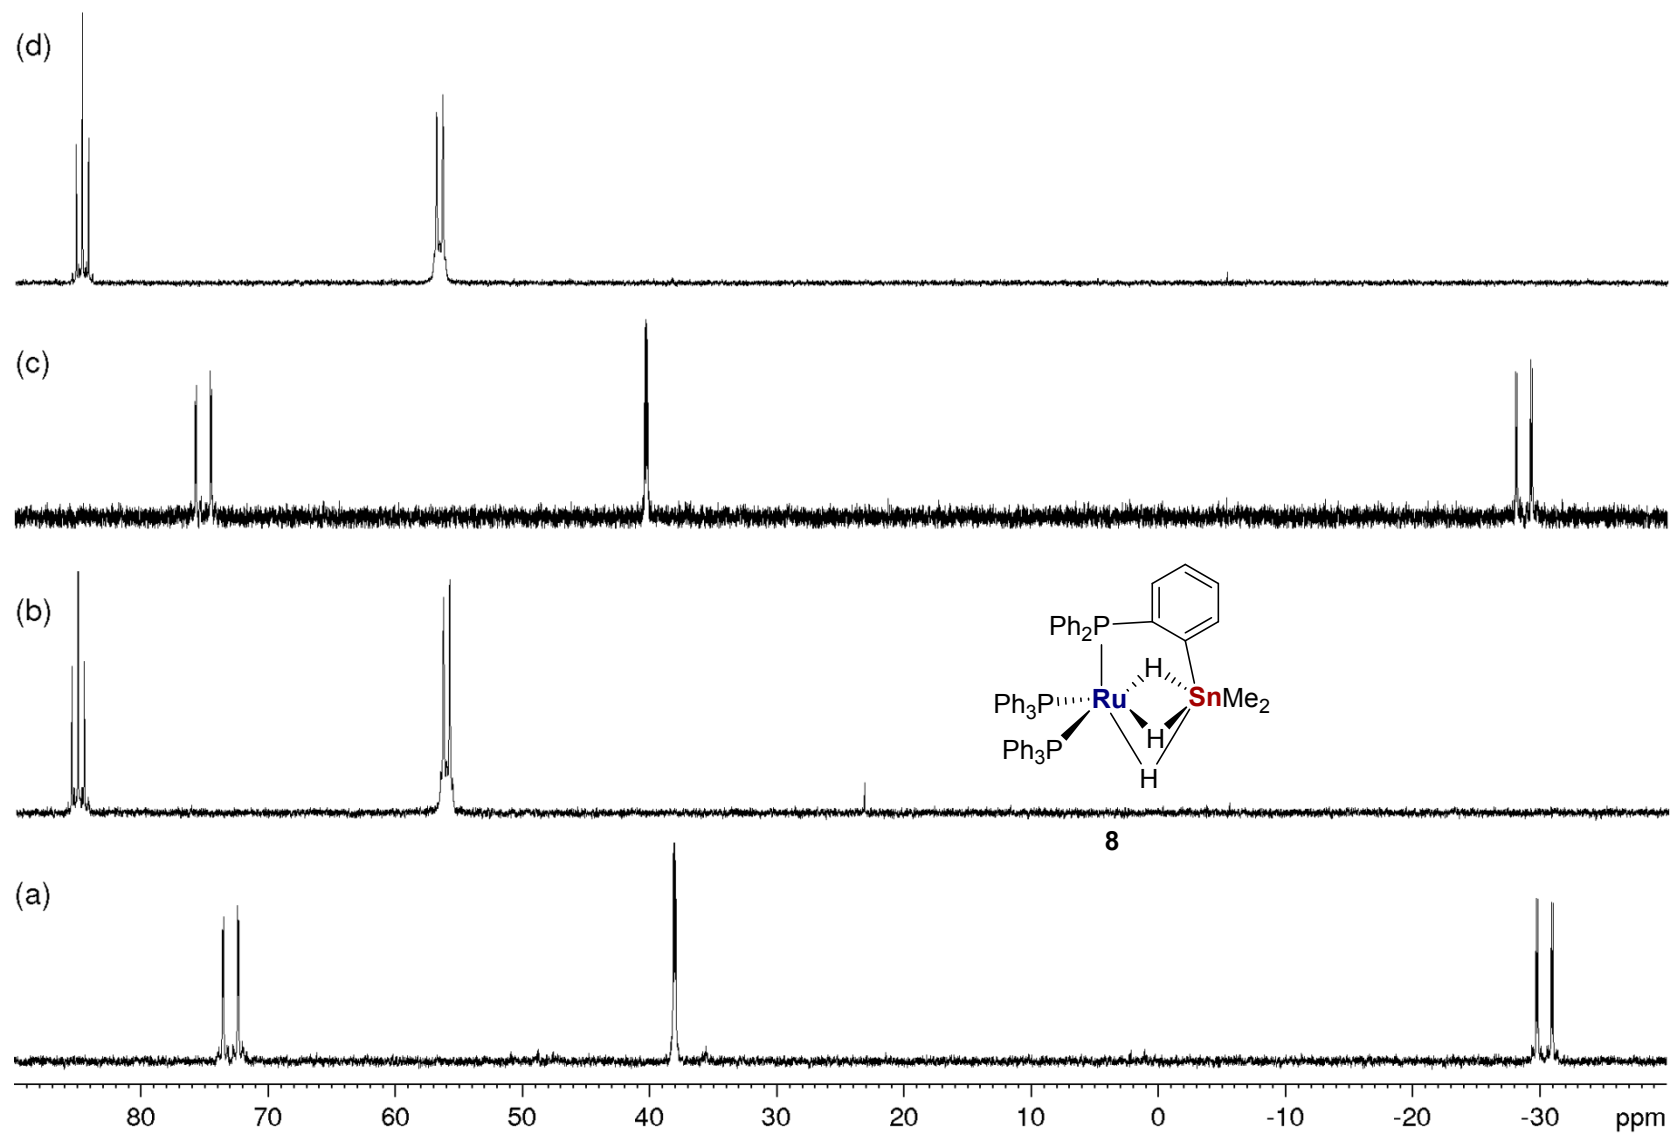

**Figure S25.**  $^{31}\text{P}\{^1\text{H}\}$  NMR spectra (202 MHz, 298 K) of (a)  $[\text{Ru}(\text{PPh}_3)(\text{C}_6\text{H}_4\text{PPh}_2)\{\text{PPh}_2\text{C}_6\text{H}_4\text{SnMe}_2\}]$  **6** in  $\text{THF-d}_8$  (a) before and (b) 15 min after addition of 1 atm  $\text{H}_2$  to give **8**. (c) and (d) show the corresponding spectra in  $\text{C}_6\text{D}_6$ . Samples were not shaken to avoid precipitation.

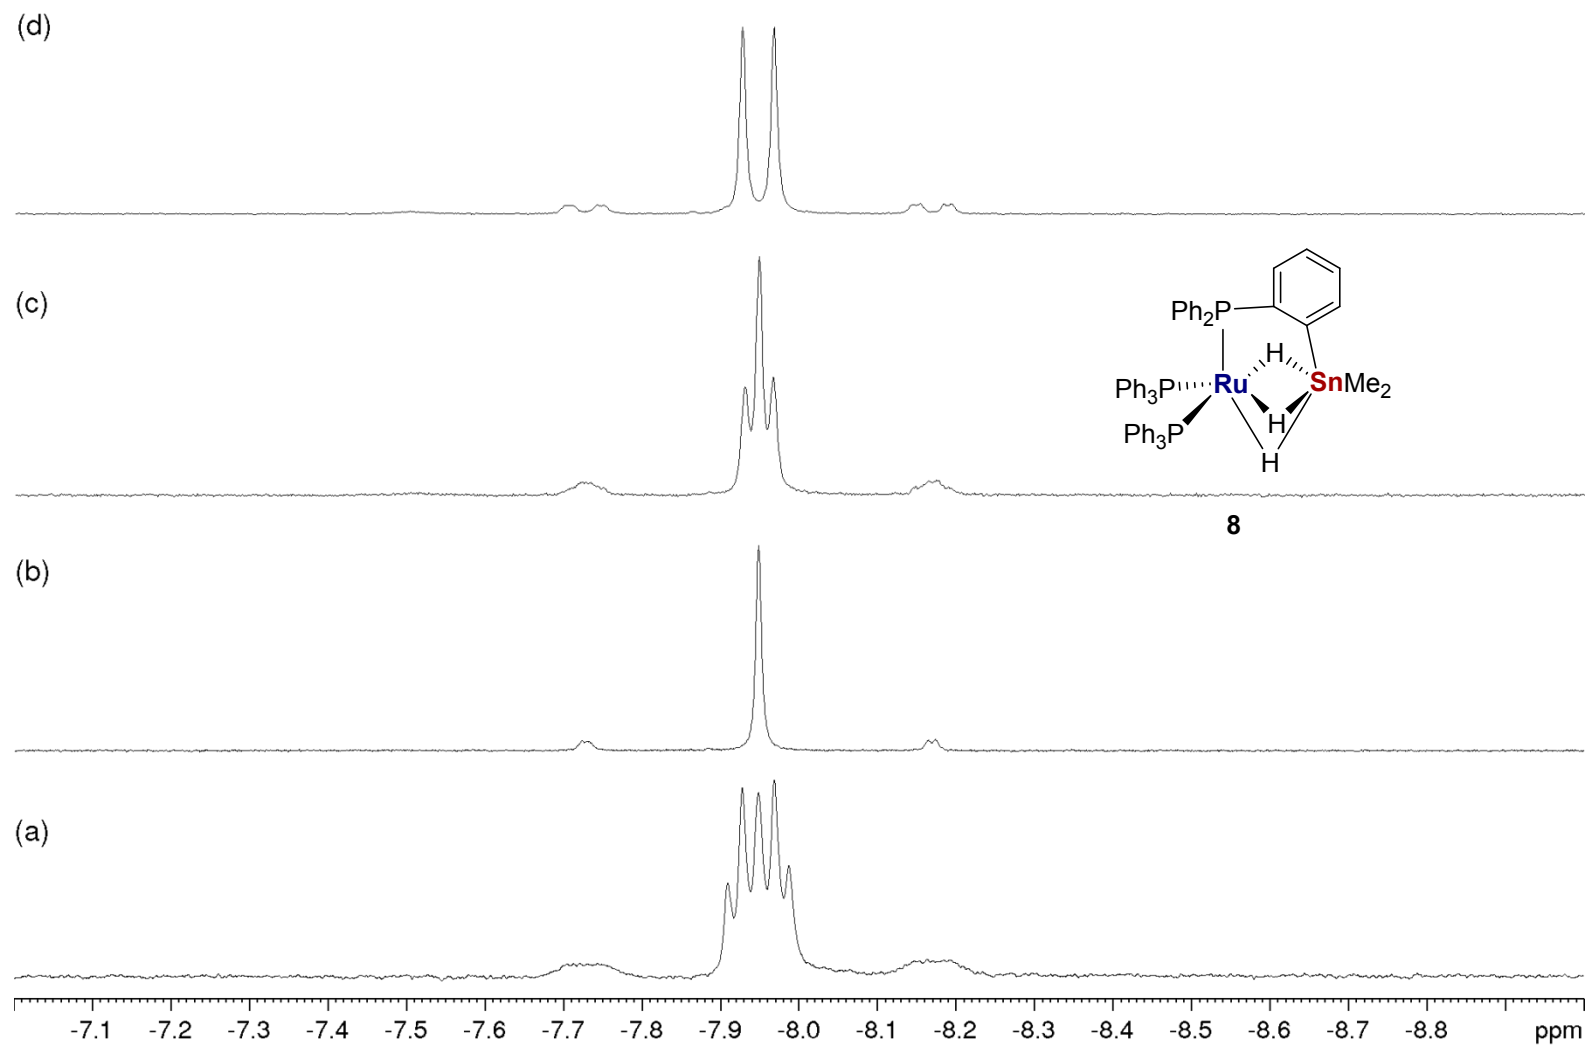

**Figure S26.** Hydride region (400 MHz, THF-*d*<sub>8</sub>, 332 K) of the (a) <sup>1</sup>H, (b) <sup>1</sup>H{<sup>31</sup>P} (broadband), (c) <sup>1</sup>H{<sup>31</sup>P} (selective at 84 ppm) and (d) <sup>1</sup>H{<sup>31</sup>P} (selective at 55 ppm) NMR spectra of the reaction of [Ru(PPh<sub>3</sub>)(C<sub>6</sub>H<sub>4</sub>PPh<sub>2</sub>){PPh<sub>2</sub>C<sub>6</sub>H<sub>4</sub>SnMe<sub>2</sub>}] **6** with H<sub>2</sub> to give **8**.



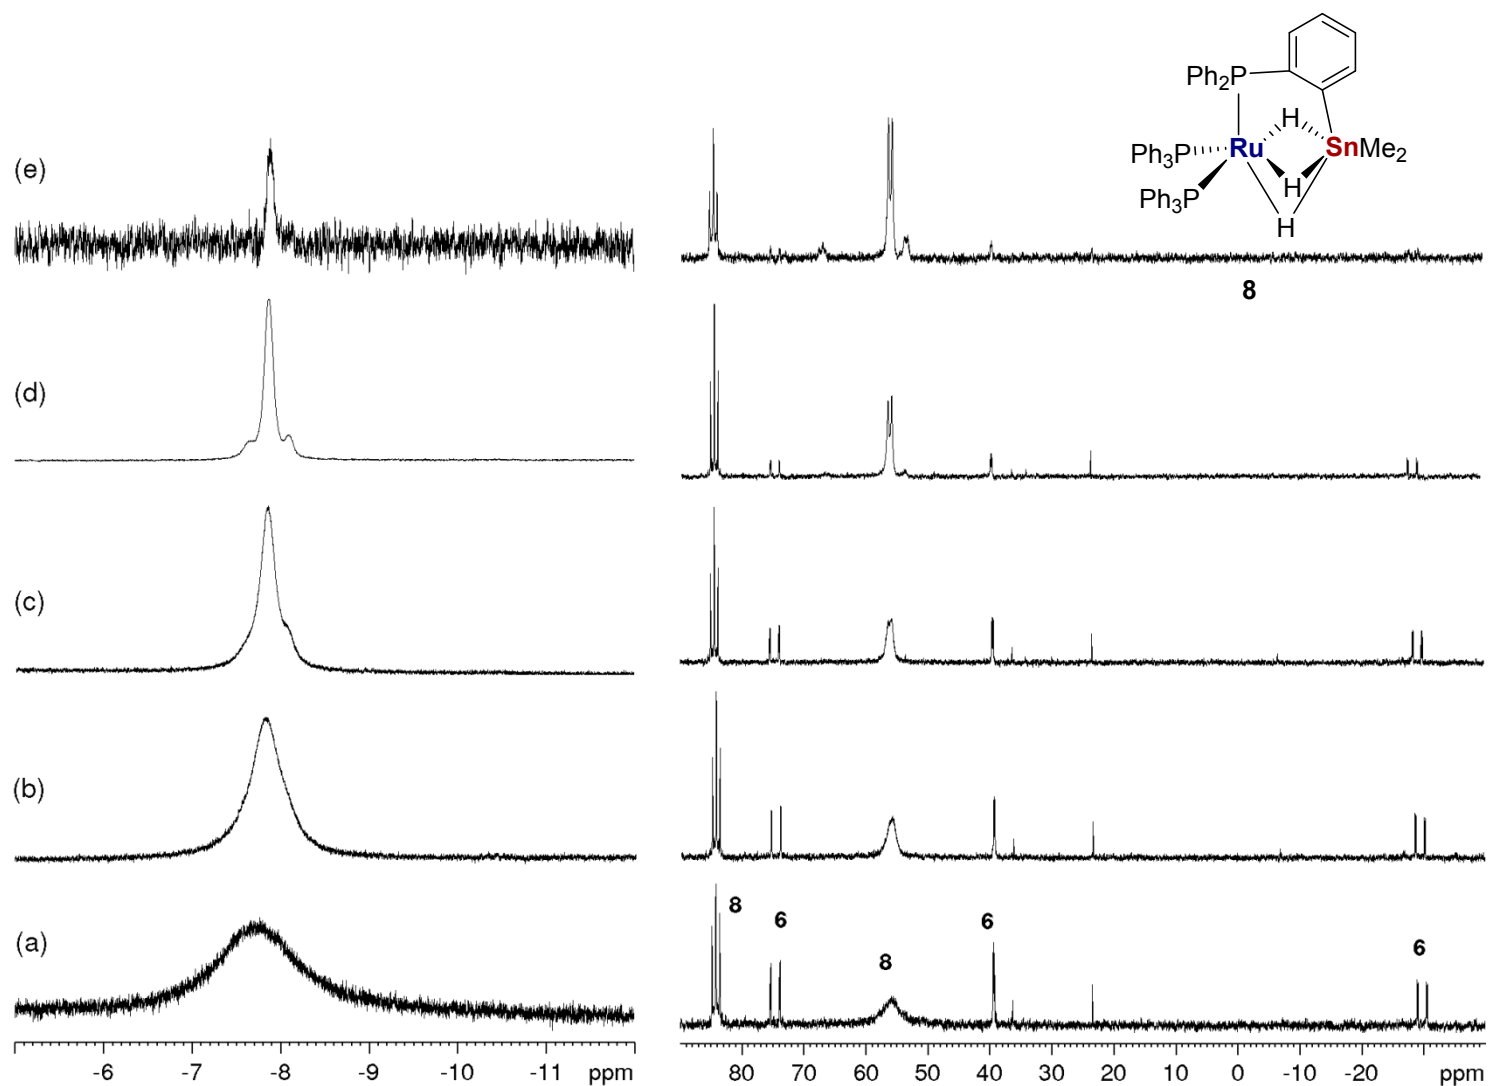

**Figure 27.** Hydride region of the  $^1\text{H}$  (400 MHz) and  $^{31}\text{P}\{^1\text{H}\}$  NMR (162 MHz,  $\text{THF-}d_8$ ) spectra showing sharpening of signals for **8** and disappearance of  $[\text{Ru}(\text{PPh}_3)(\text{C}_6\text{H}_4\text{PPh}_2)\{\text{PPh}_2\text{C}_6\text{H}_4\text{SnMe}_2\}]$  **6** under 1 atm  $\text{H}_2$  at (a) 223 K, (b) 236 K, (c) 246 K, (d) 259 K and (e) 272 K.

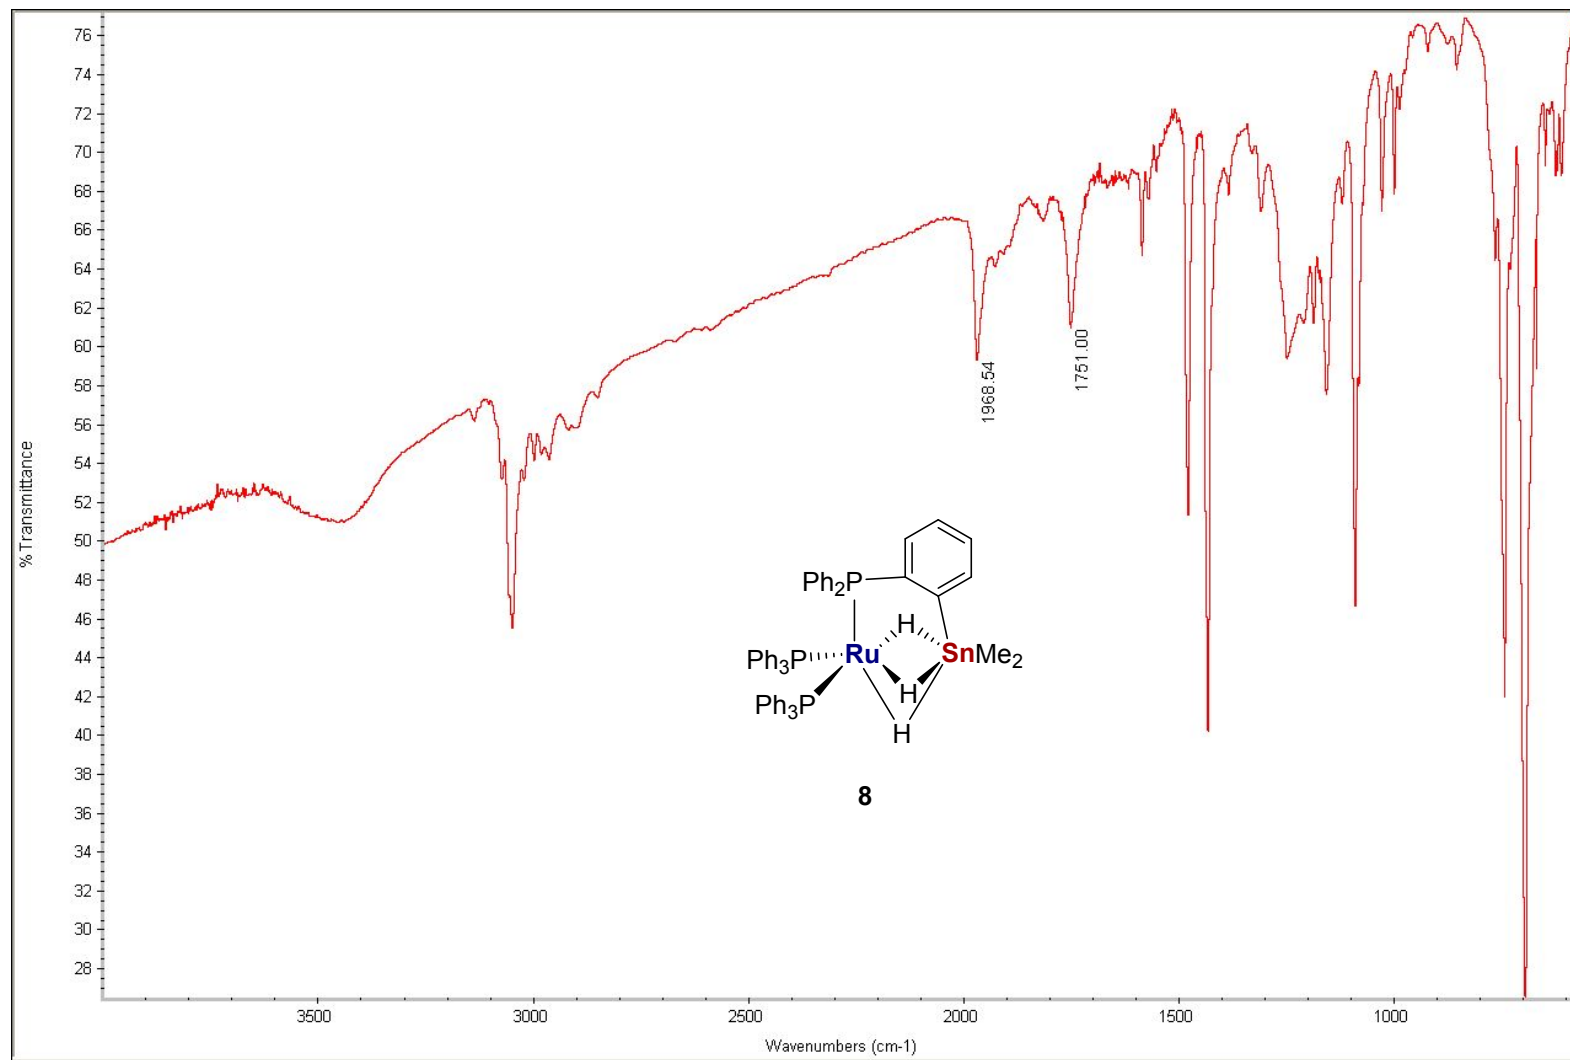

**Figure S28.** IR spectrum (KBr) of **8** precipitated by shaking a THF solution of  $[\text{Ru}(\text{PPh}_3)(\text{C}_6\text{H}_4\text{PPh}_2)\{\text{PPh}_2\text{C}_6\text{H}_4\text{SnMe}_2\}]$  **6** under  $\text{H}_2$ .

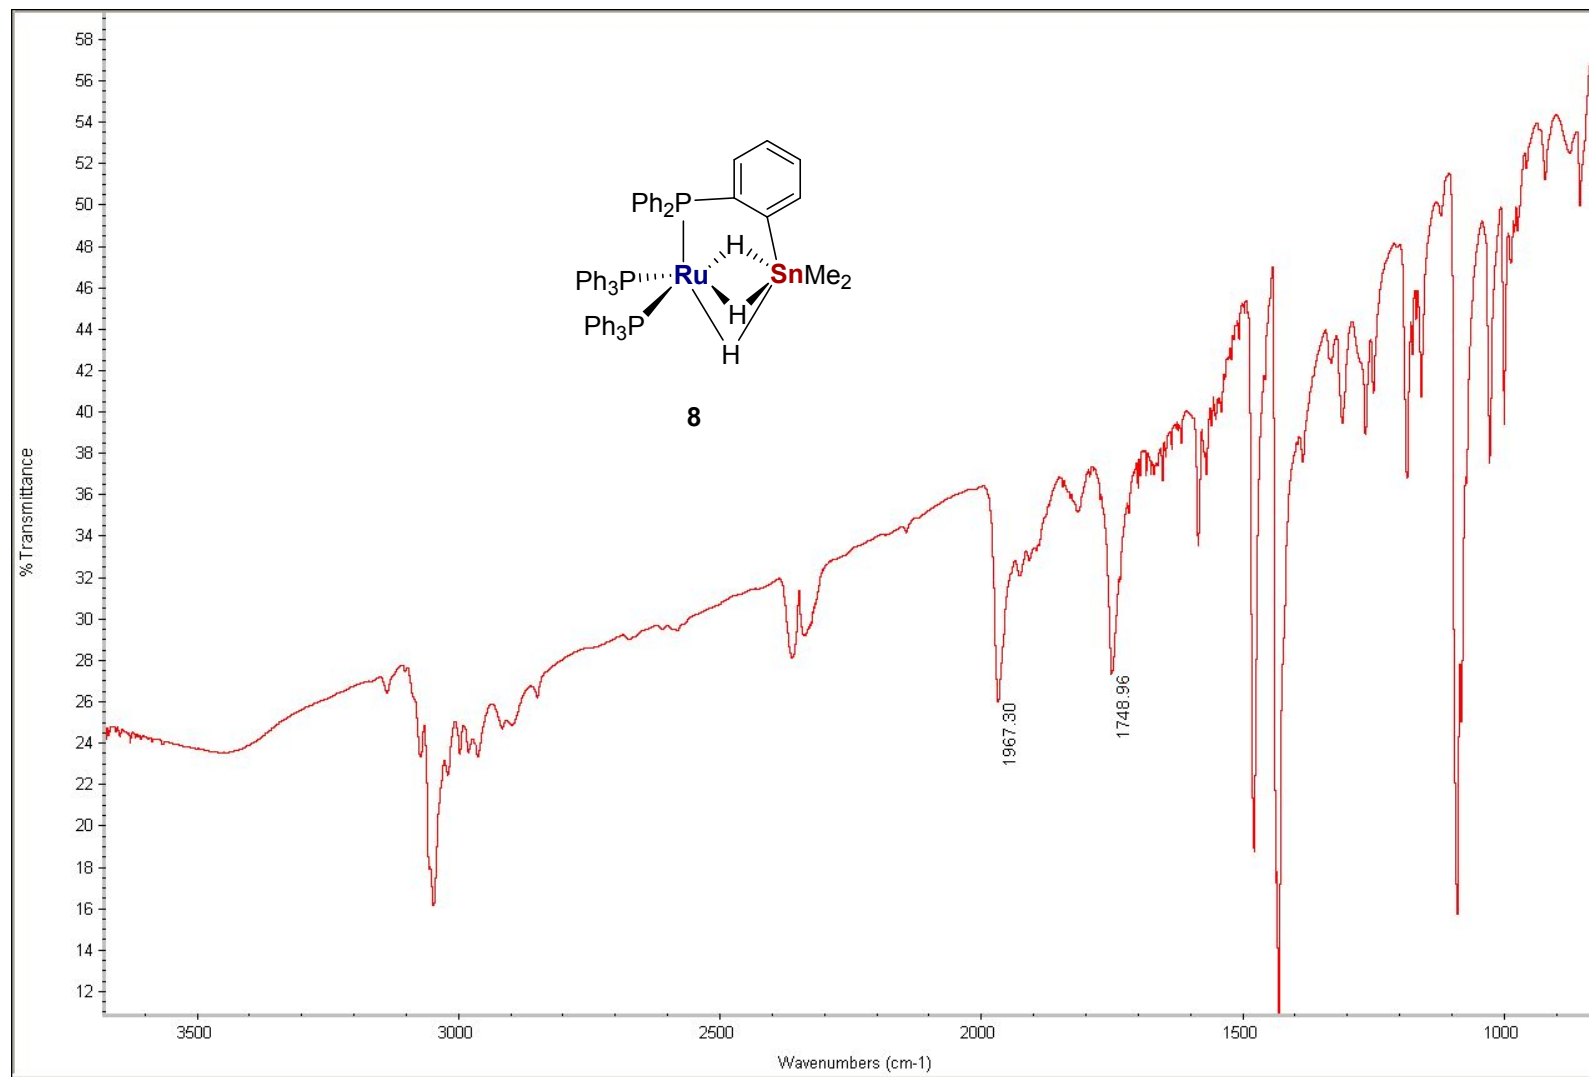

**Figure S29.** IR spectrum (KBr) of a solid residue of **8** formed following evaporation of a C<sub>6</sub>D<sub>6</sub> solution of [Ru(PPh<sub>3</sub>)(C<sub>6</sub>H<sub>4</sub>PPh<sub>2</sub>){PPh<sub>2</sub>C<sub>6</sub>H<sub>4</sub>SnMe<sub>2</sub>}] **6** through which 1 atm H<sub>2</sub> was allowed to slowly diffuse.

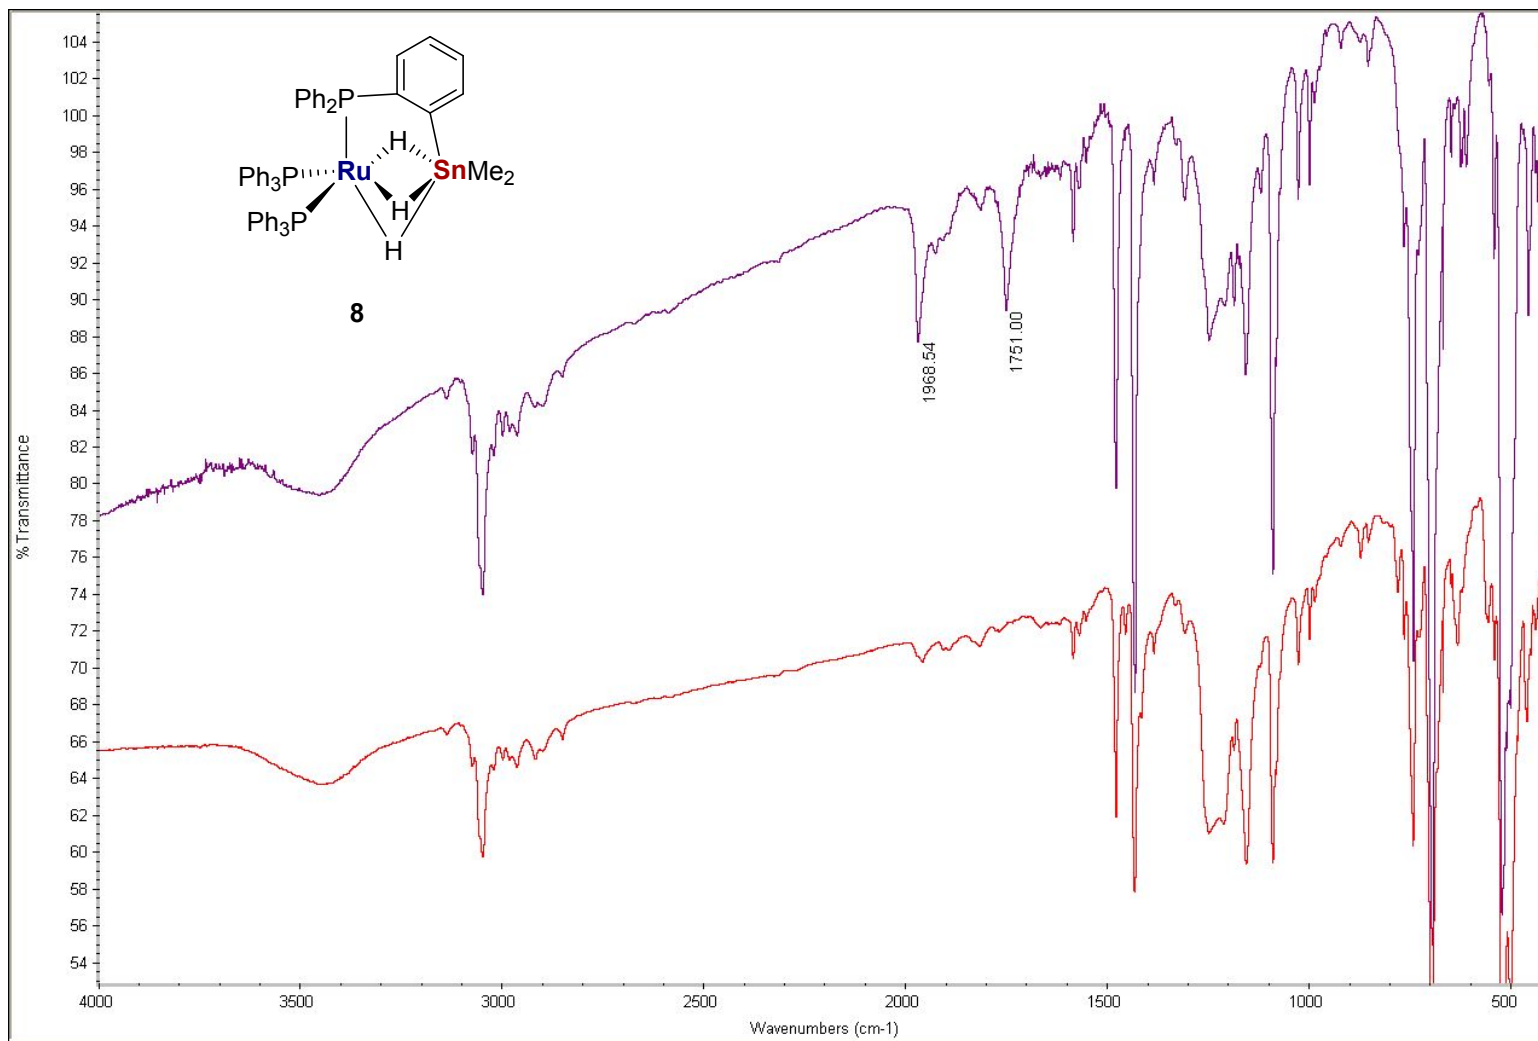

**Figure S30.** Overlaid IR spectra (KBr) of solid samples of  $[\text{Ru}(\text{PPh}_3)(\text{C}_6\text{H}_4\text{PPh}_2)\{\text{PPh}_2\text{C}_6\text{H}_4\text{SnMe}_2\}]$  **6** stirred under (top) 1 atm H<sub>2</sub> and (bottom) 1 atm D<sub>2</sub> showing the absence of the bands assigned to  $\nu_{\text{Ru-H}}$  in the latter case.

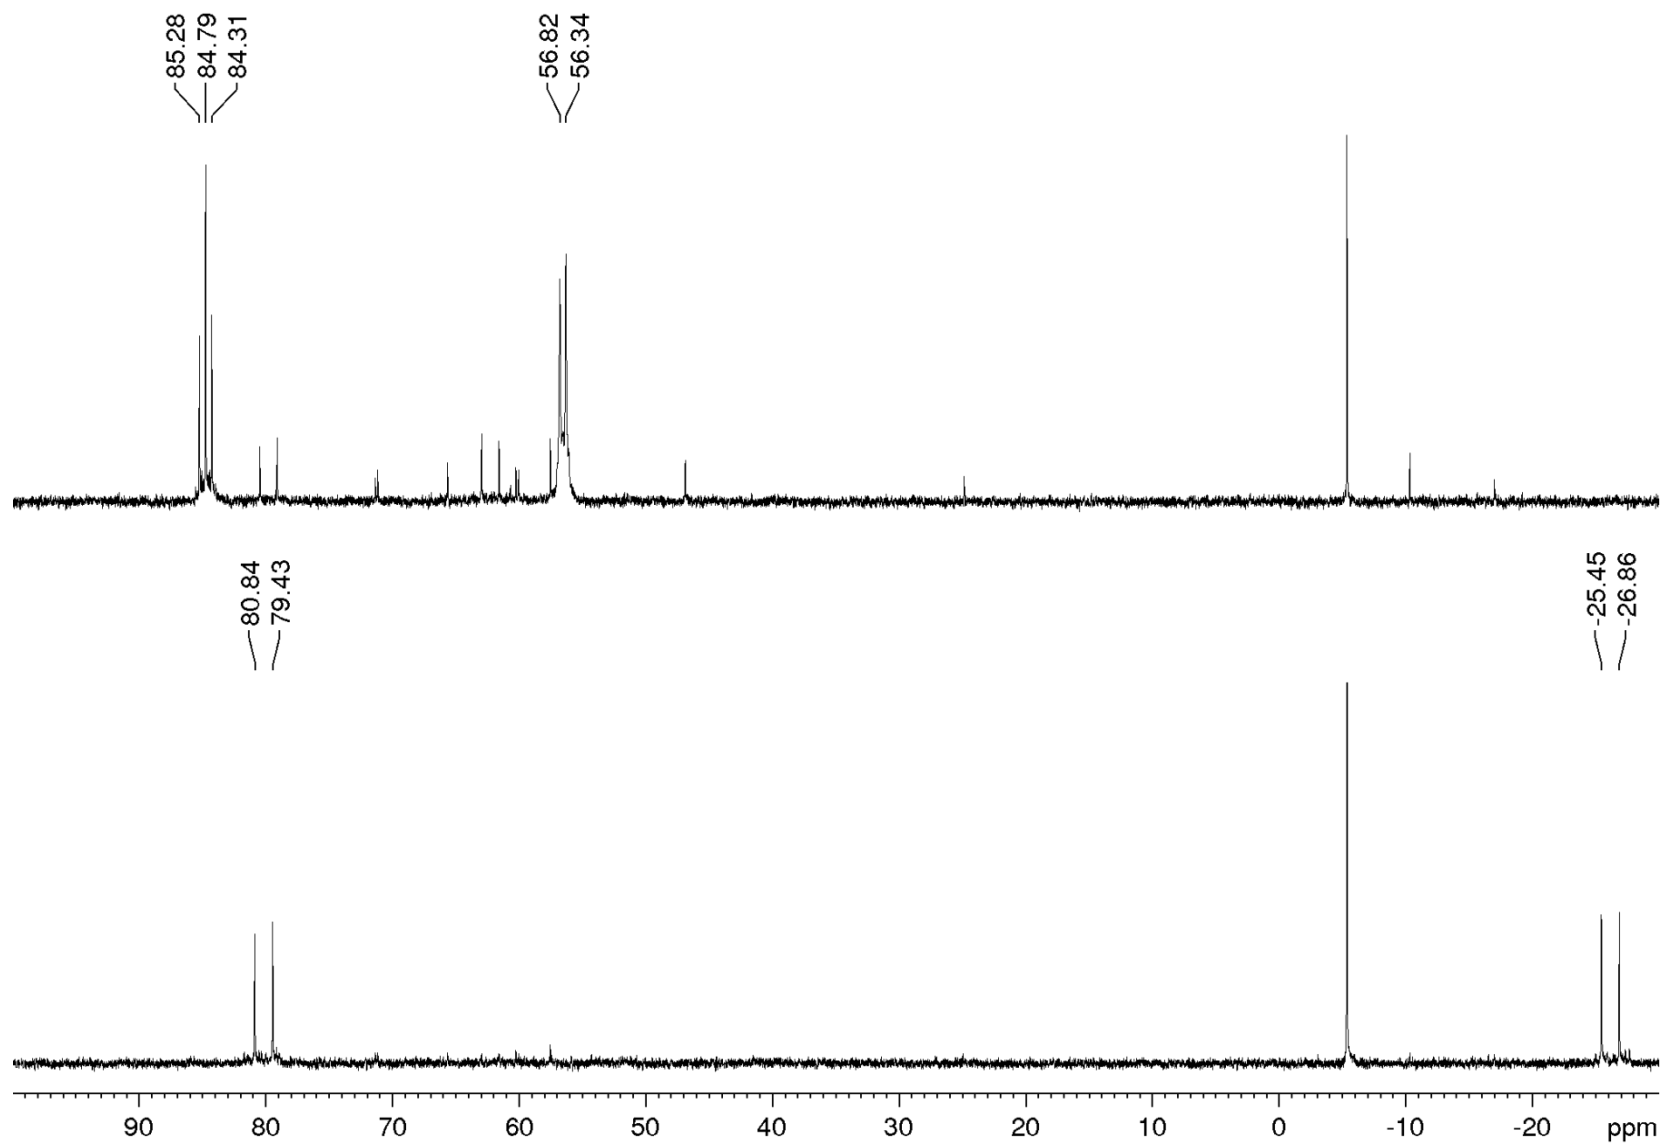

**Figure S31.**  $^{31}\text{P}\{^1\text{H}\}$  NMR spectra (202 MHz, 298 K) showing (bottom) formation of  $[\text{Ru}(\text{NC}_5\text{H}_5)(\text{C}_6\text{H}_4\text{PPh}_2)(\text{PPh}_2\text{C}_6\text{H}_4\text{SnMe}_2)]$  from reaction of  $[\text{Ru}(\text{PPh}_3)(\text{C}_6\text{H}_4\text{PPh}_2)\{\text{PPh}_2\text{C}_6\text{H}_4\text{SnMe}_2\}]$  **6** with excess pyridine in  $\text{C}_6\text{D}_6$  and (top) formation of **8** upon adding  $\text{H}_2$  to the sample.

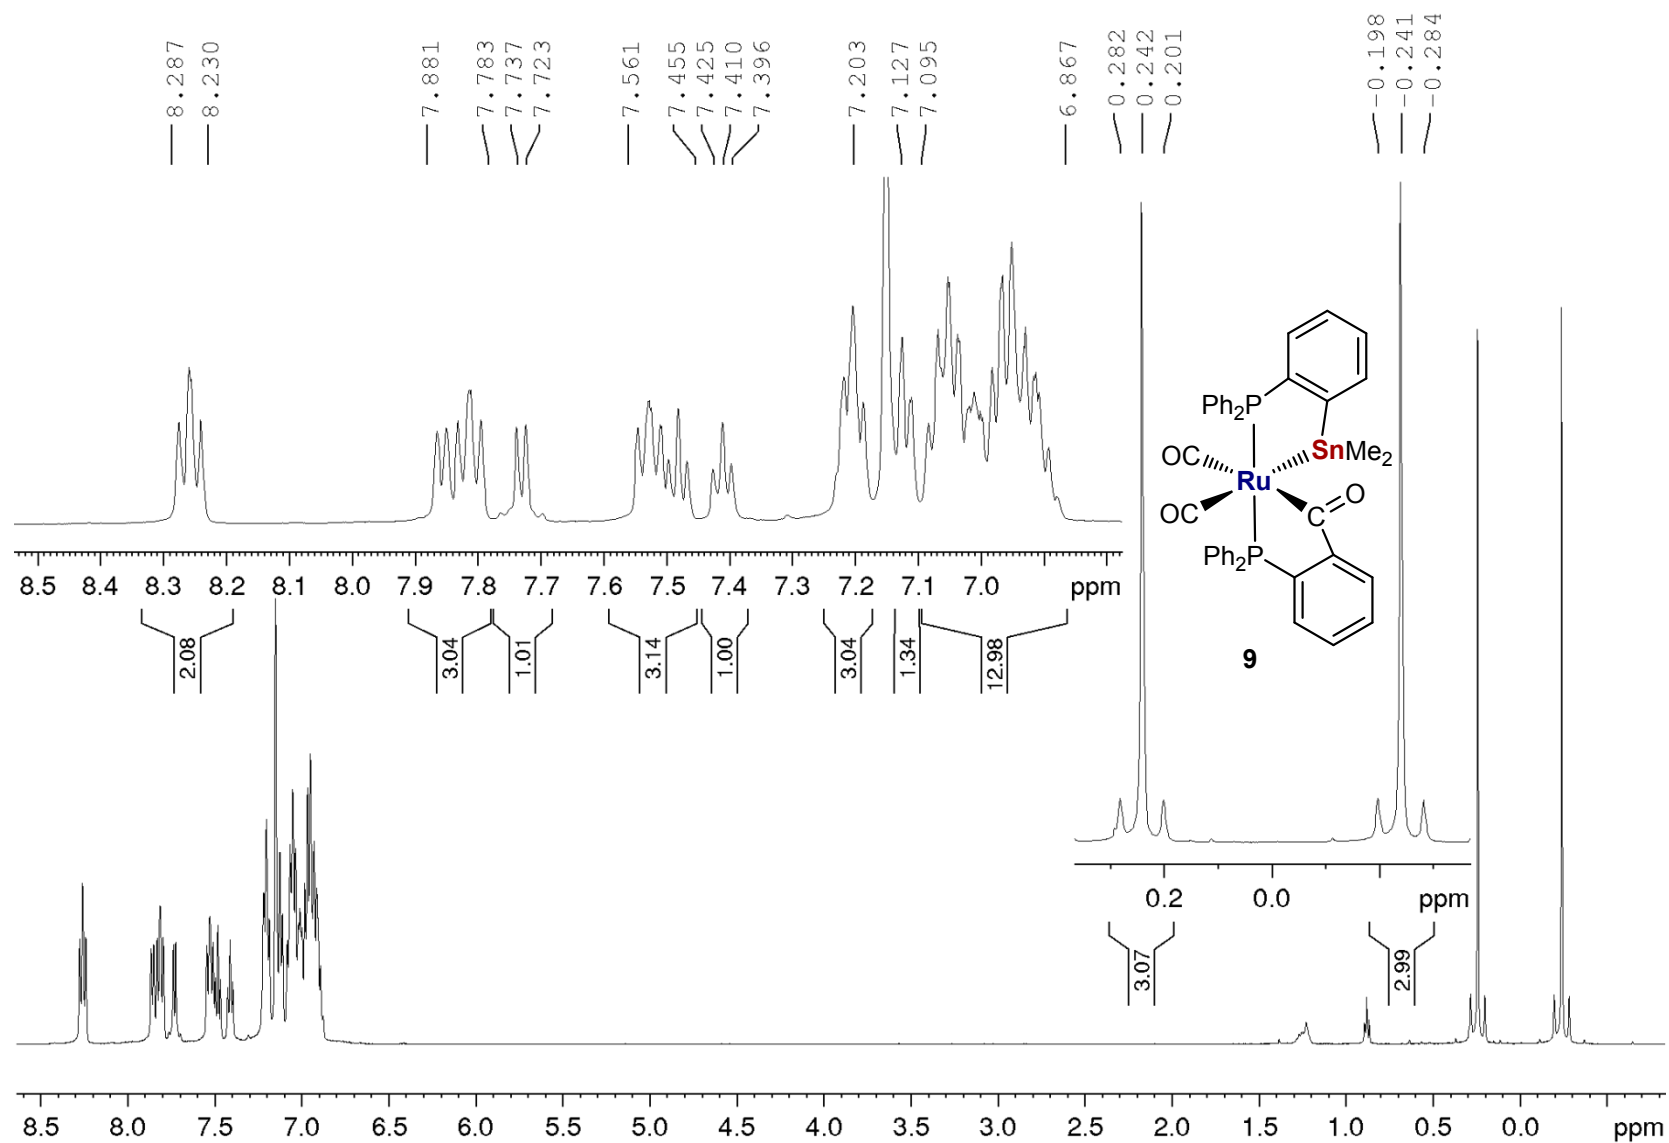

**Figure S32.** <sup>1</sup>H NMR spectrum (500 MHz, C<sub>6</sub>D<sub>6</sub>, 298 K) of [Ru(CO)<sub>2</sub>(C(O)C<sub>6</sub>H<sub>4</sub>PPh<sub>2</sub>)(PPh<sub>2</sub>C<sub>6</sub>H<sub>4</sub>SnMe<sub>2</sub>)] **9**, with insets of aromatic and SnMe<sub>2</sub> resonances.

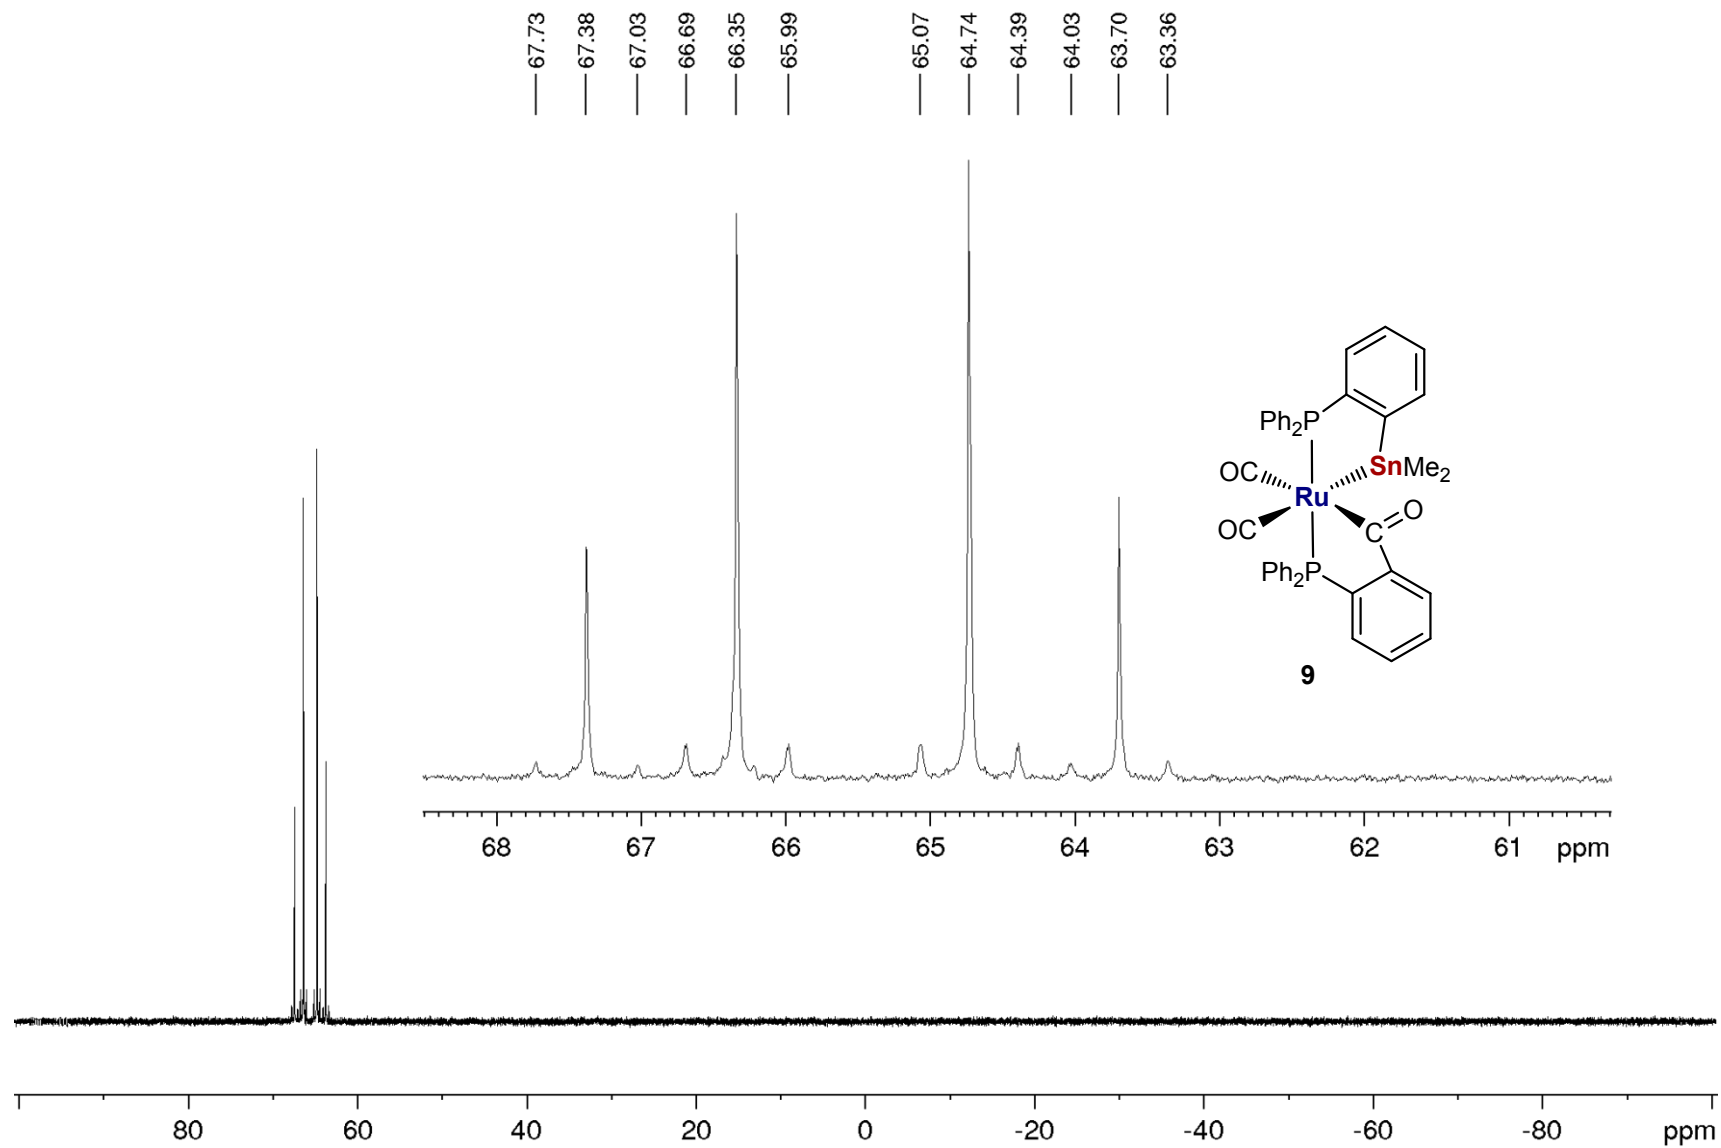

**Figure S33.**  $^{31}\text{P}\{^1\text{H}\}$  NMR spectrum (202 MHz,  $\text{C}_6\text{D}_6$ , 298 K) of  $[\text{Ru}(\text{CO})_2(\text{C}(\text{O})\text{C}_6\text{H}_4\text{PPh}_2)(\text{PPh}_2\text{C}_6\text{H}_4\text{SnMe}_2)]$  **9**.

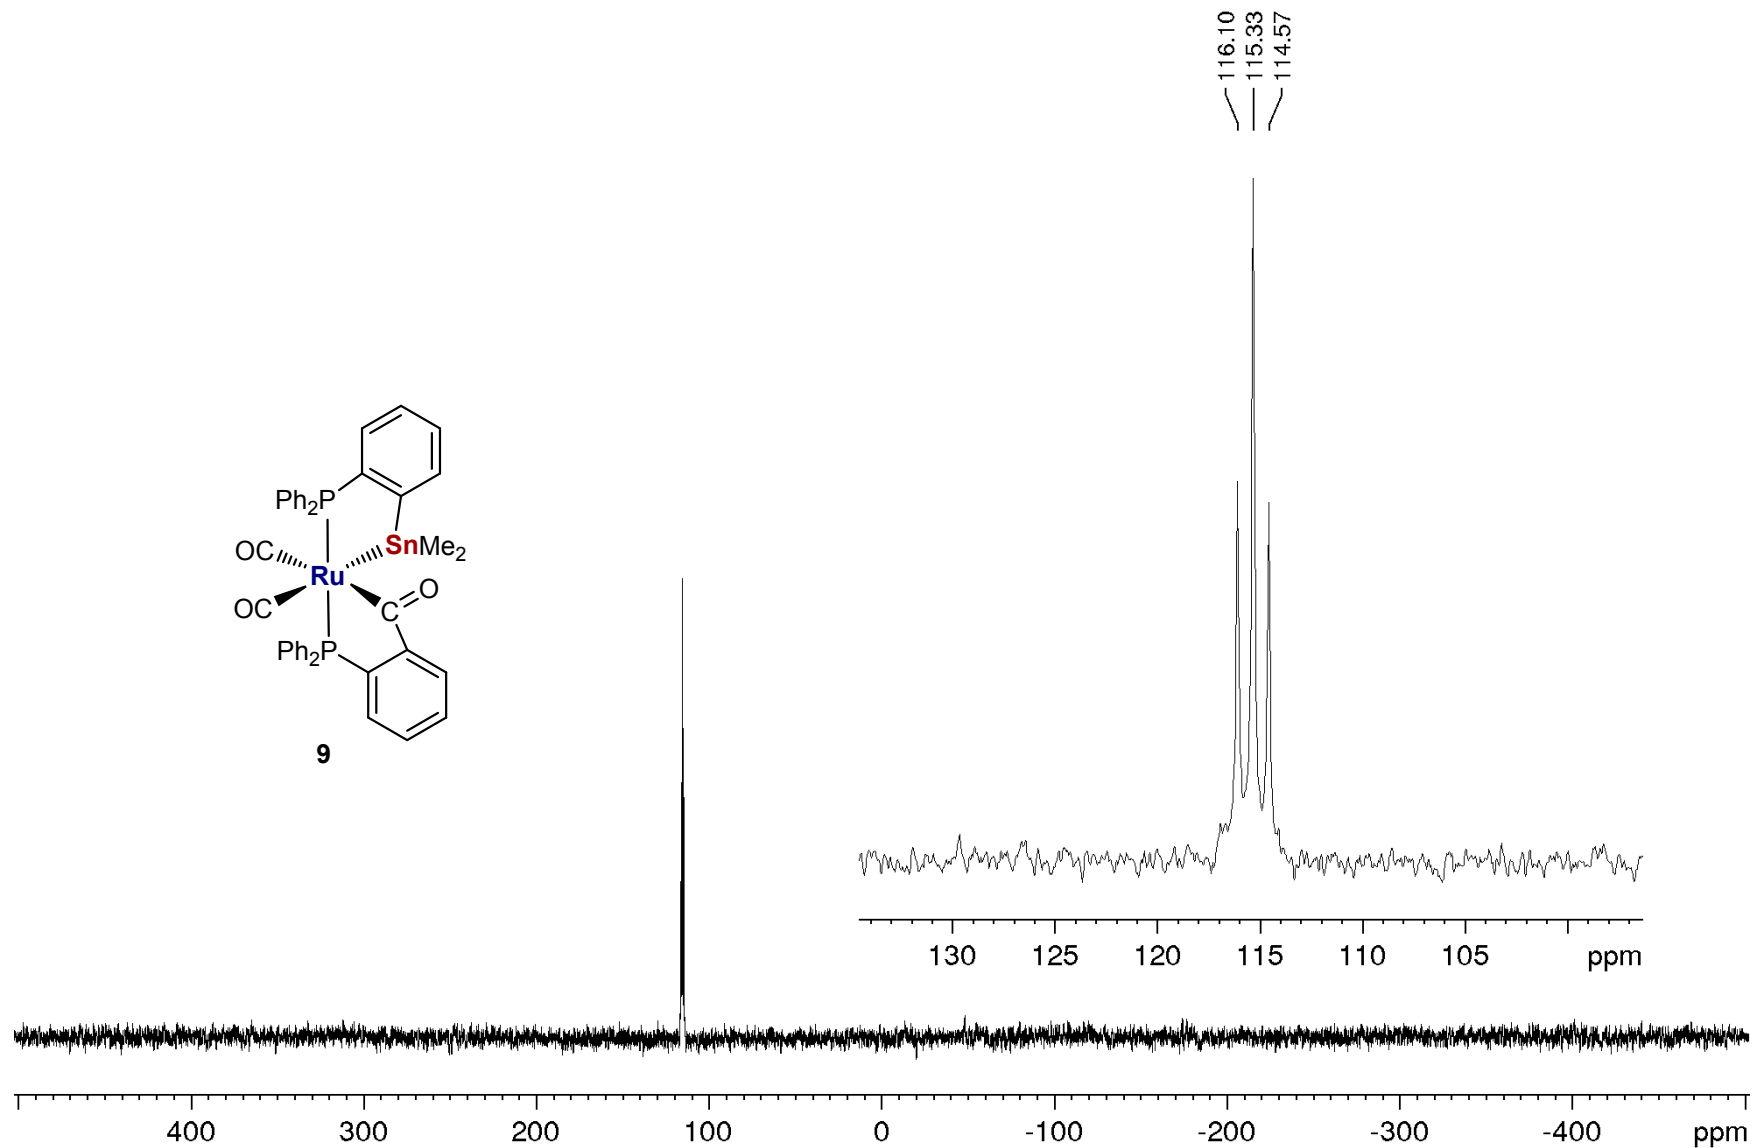

**Figure S34.**  $^{119}\text{Sn}\{^1\text{H}\}$  NMR spectrum (187 MHz,  $\text{C}_6\text{D}_6$ , 298 K) of  $[\text{Ru}(\text{CO})_2(\text{C}(\text{O})\text{C}_6\text{H}_4\text{PPh}_2)(\text{PPh}_2\text{C}_6\text{H}_4\text{SnMe}_2)]$  **9**.



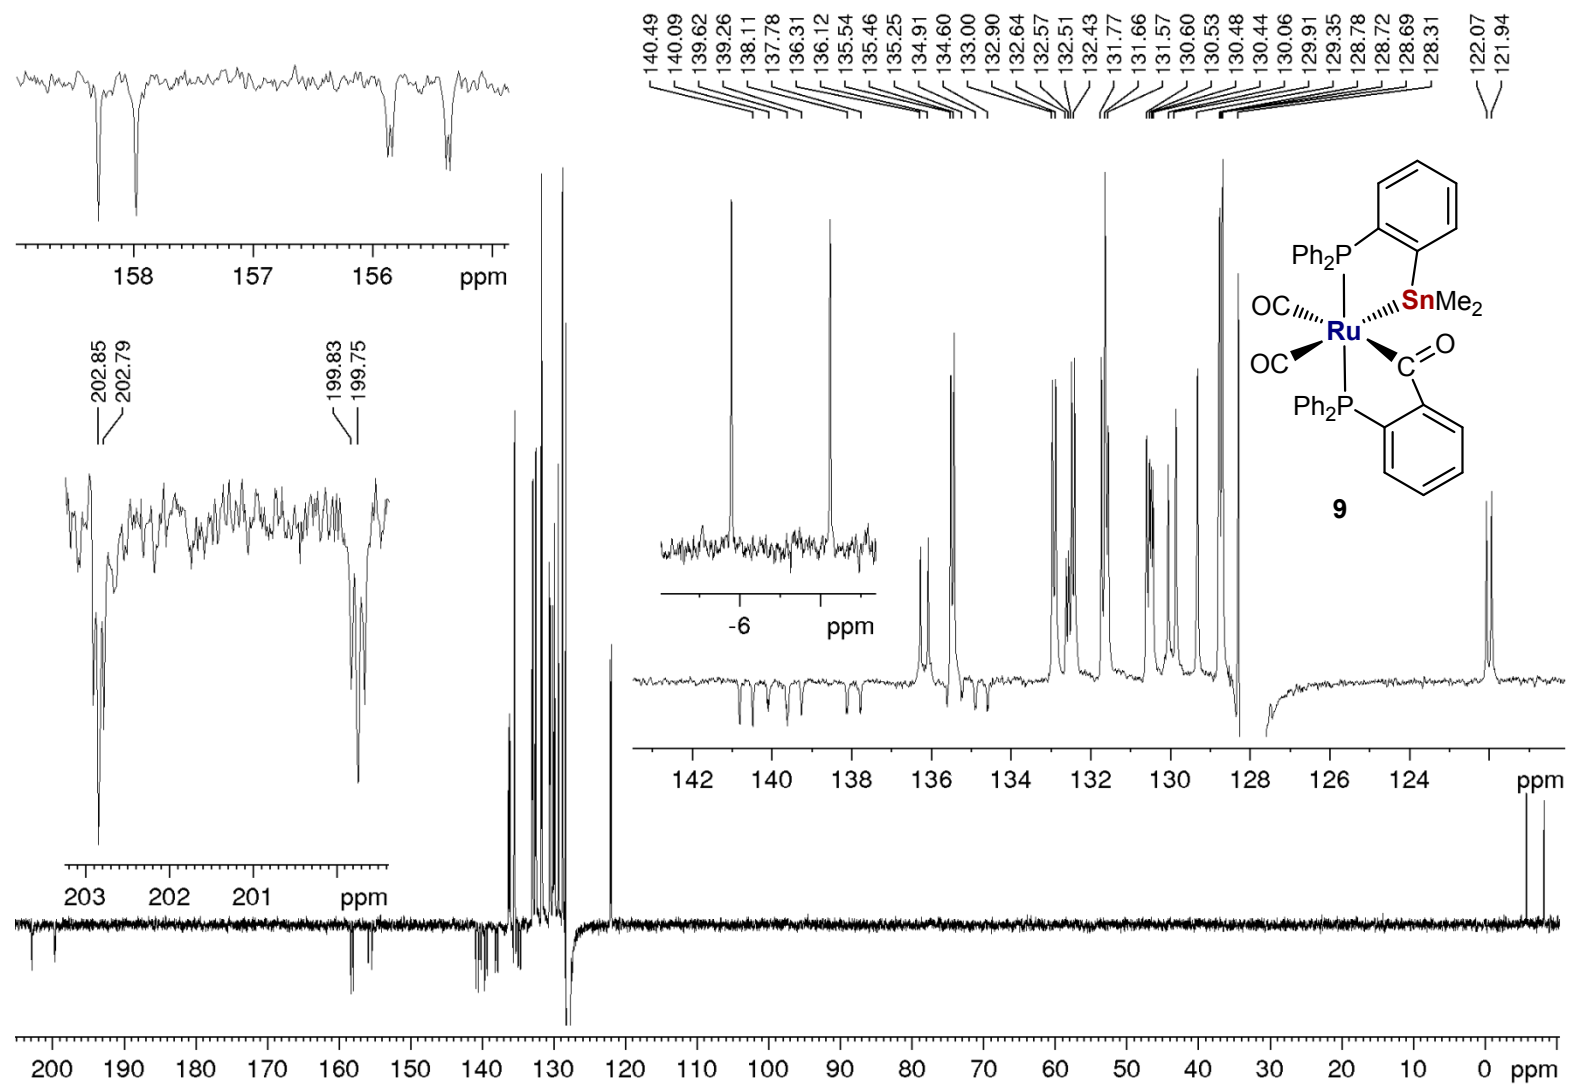

**Figure S35.**  $^{13}\text{C}\{^1\text{H}\}$  NMR spectrum (126 MHz,  $\text{C}_6\text{D}_6$ , 298 K) of  $[\text{Ru}(\text{CO})_2(\text{C}(\text{O})\text{C}_6\text{H}_4\text{PPh}_2)(\text{PPh}_2\text{C}_6\text{H}_4\text{SnMe}_2)]$  **9**, with insets of high and low frequency regions, plus aromatic signals.

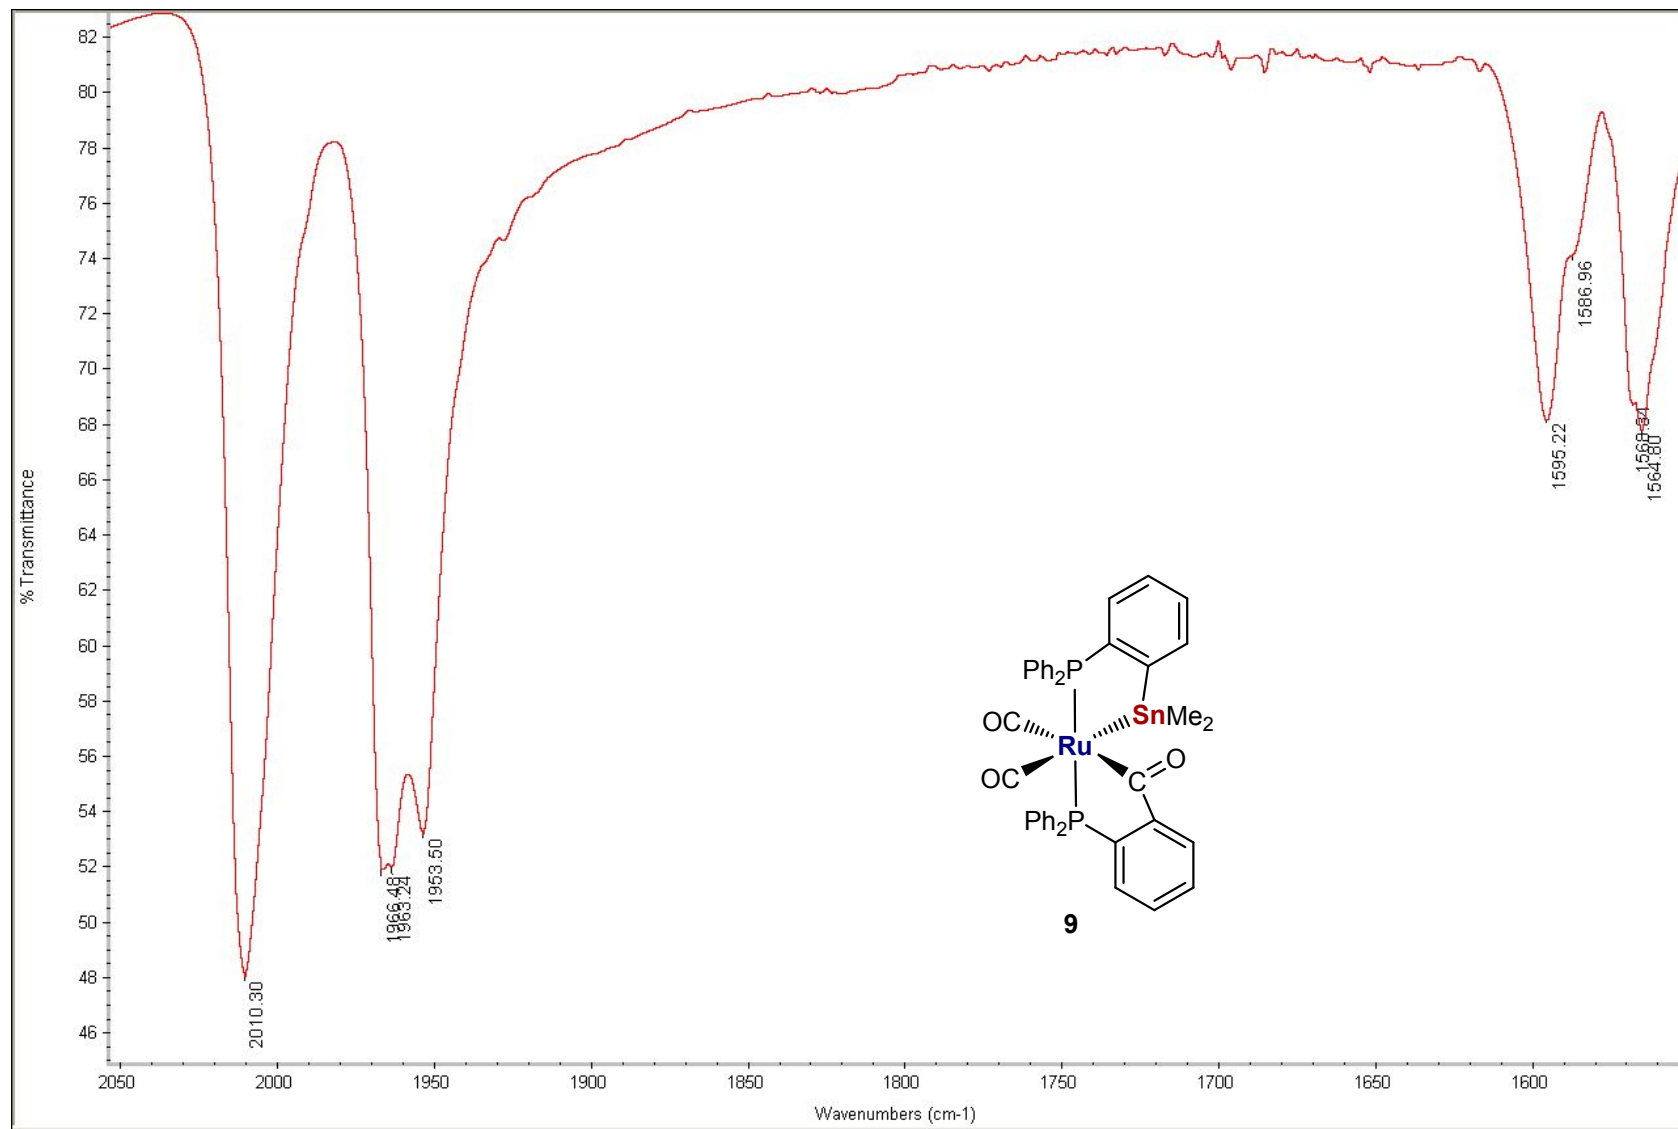

**Figure S36.** Carbonyl region of the IR spectrum (KBr) of  $[\text{Ru}(\text{CO})_2(\text{C}(\text{O})\text{C}_6\text{H}_4\text{PPh}_2)(\text{PPh}_2\text{C}_6\text{H}_4\text{SnMe}_2)]$  **9**.

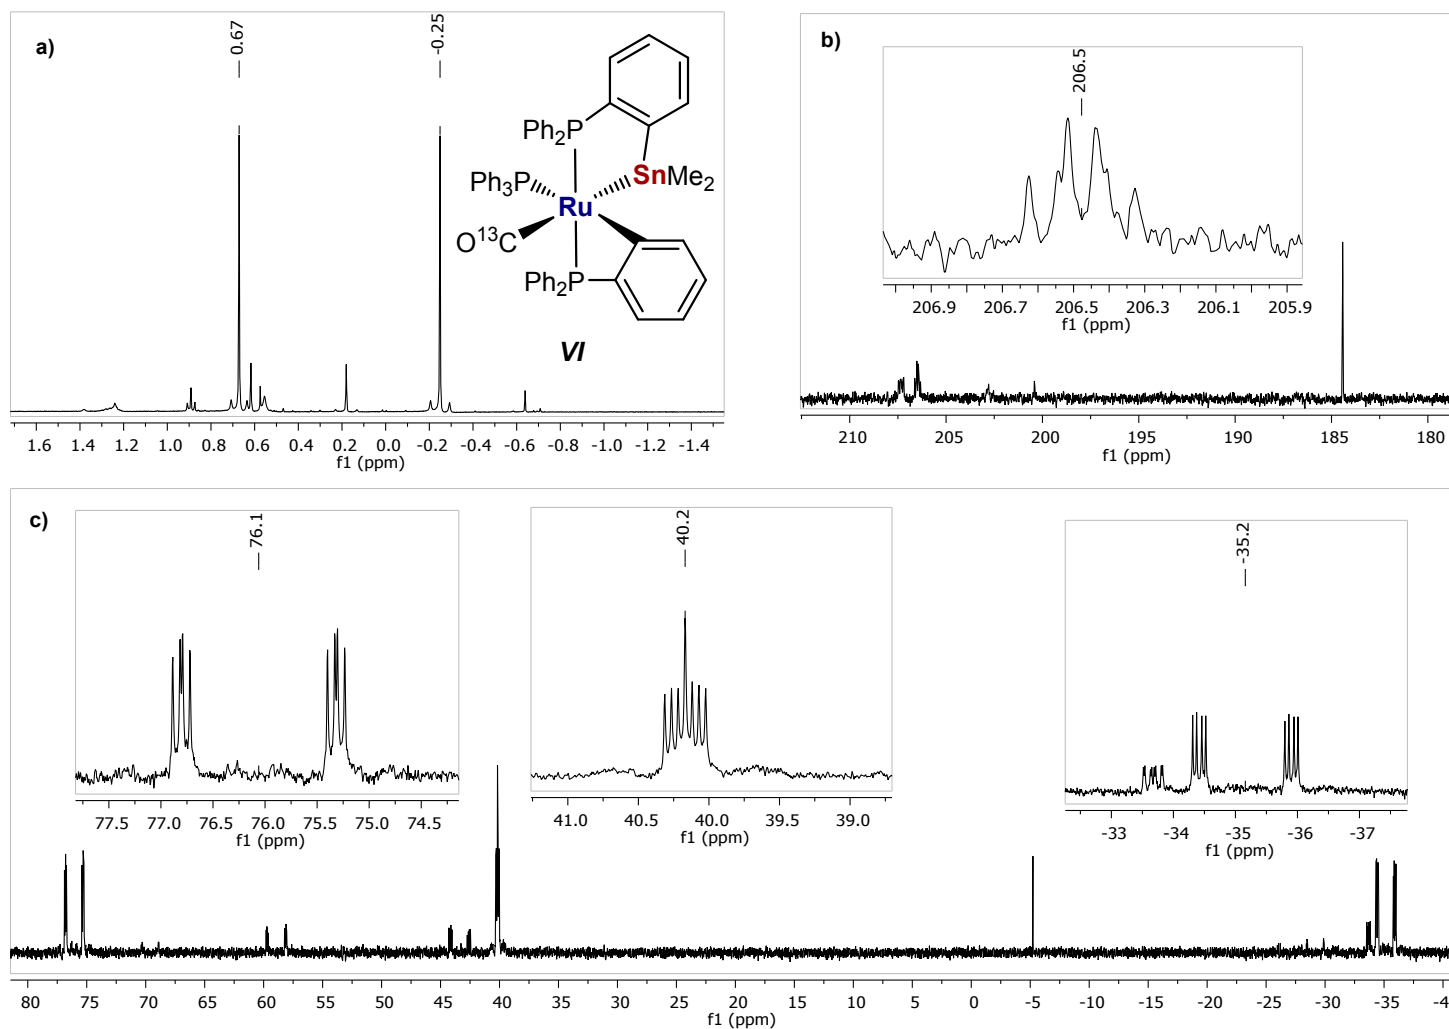

**Figure S37.** NMR spectra of *VI*-<sup>13</sup>CO from reaction of **6** with <sup>13</sup>CO (C<sub>6</sub>D<sub>6</sub>, 298 K). (a) SnMe region of the <sup>1</sup>H NMR spectrum (400 MHz) 15 min after addition of <sup>13</sup>CO, (b) Carbonyl region of the <sup>13</sup>C{<sup>1</sup>H} NMR spectrum (101 MHz) 0.5-1 h after addition and (c) <sup>31</sup>P{<sup>1</sup>H} NMR spectrum (162 MHz) 20 min after addition.

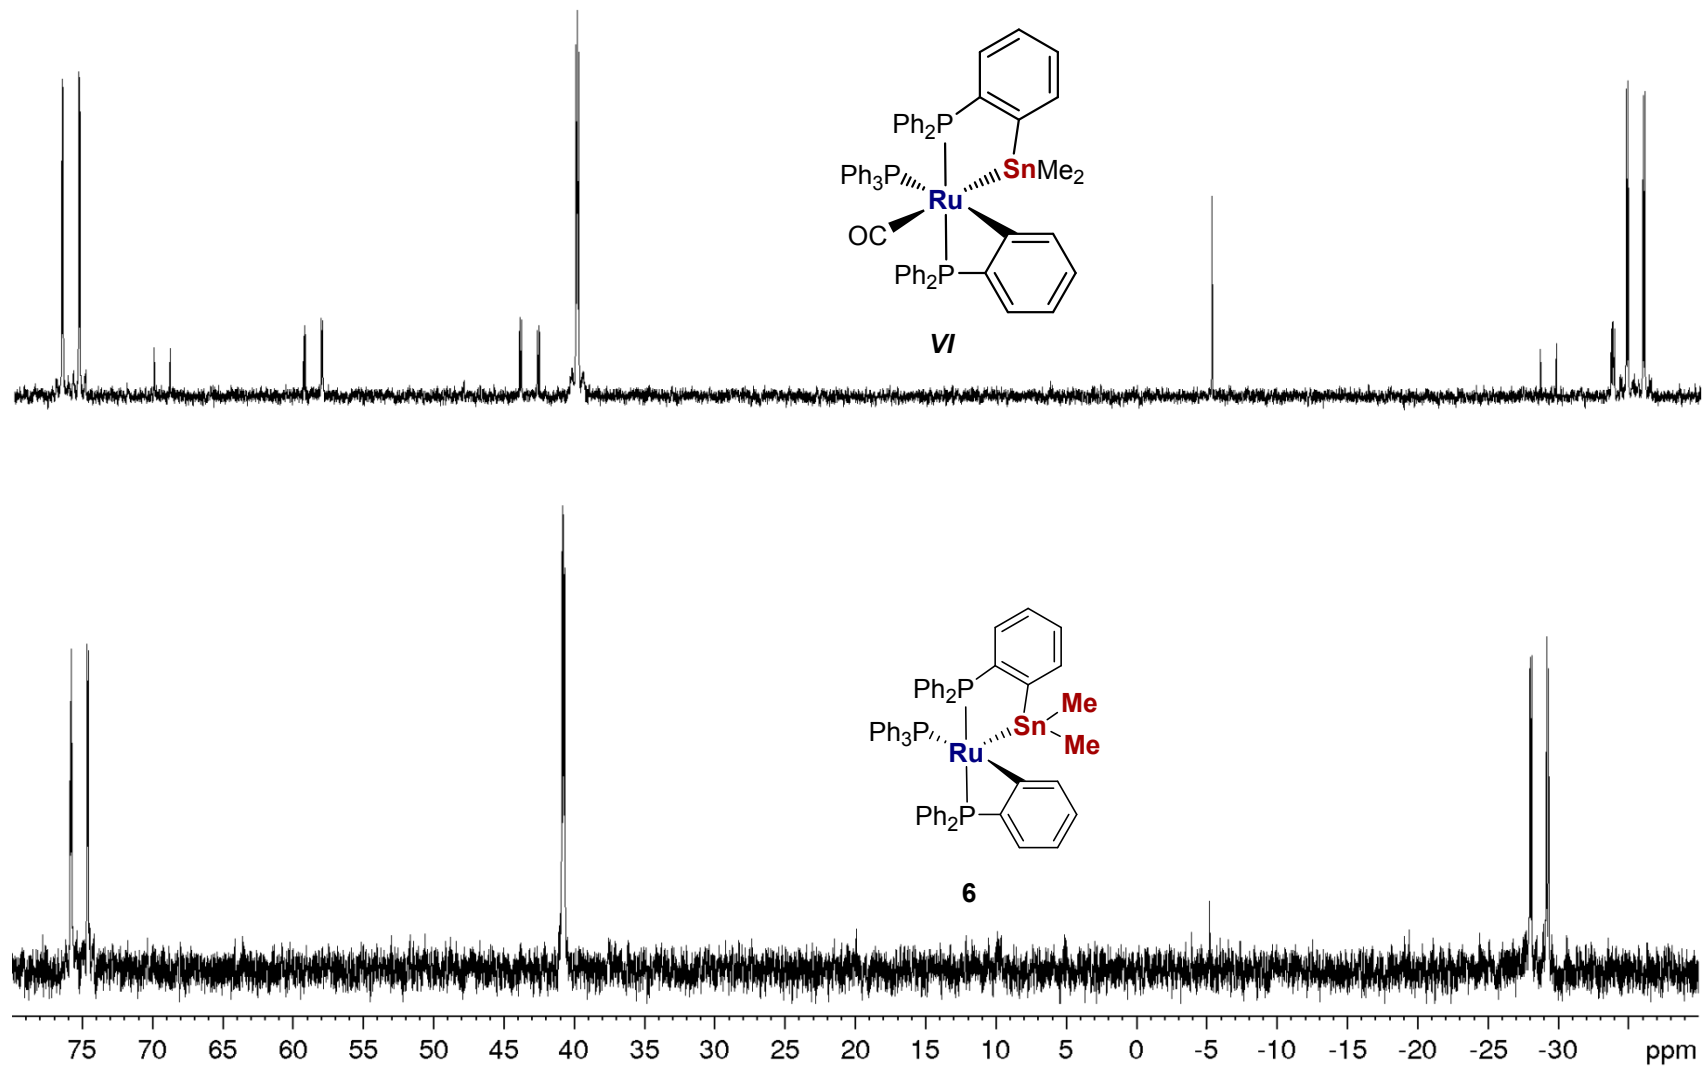

**Figure S38.**  $^{31}\text{P}\{^1\text{H}\}$  NMR spectra (202 MHz,  $\text{C}_6\text{D}_5\text{CD}_3$ , 298 K) showing (top) formation of **VII** as the main species 5 min after addition of 1 atm  $^{12}\text{CO}$  to (bottom) **6**.

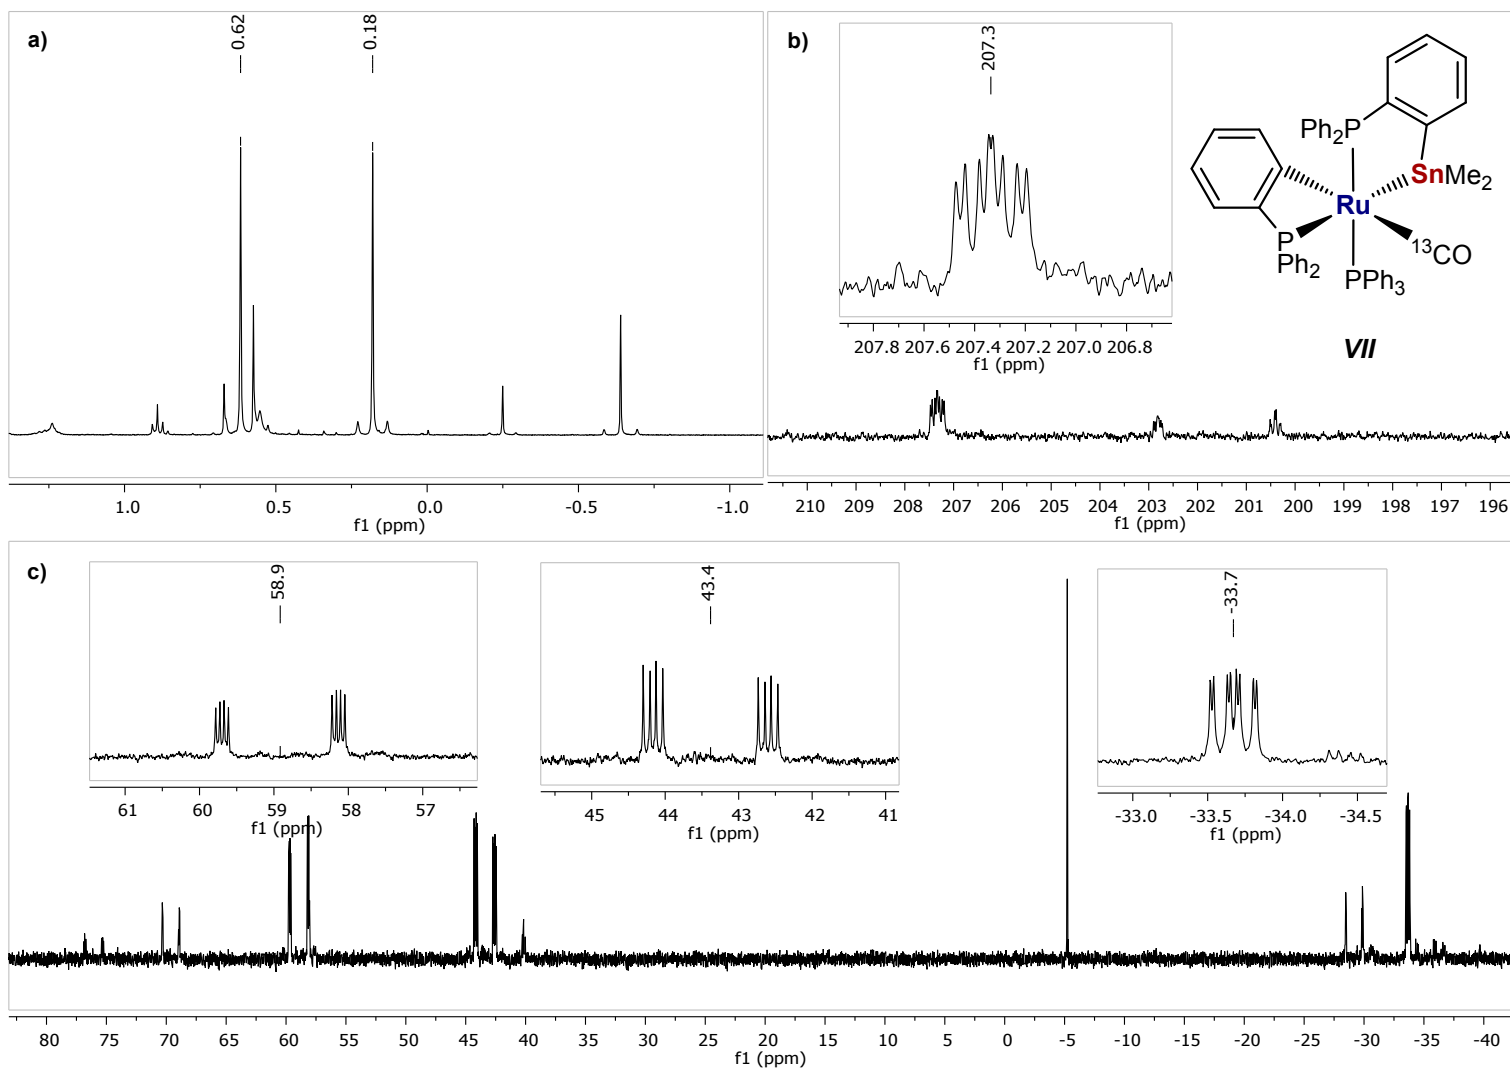

**Figure S39.** Selected NMR spectra of *VII-<sup>13</sup>CO* formed in the reaction of **6** with <sup>13</sup>CO. (a) Sn-CH<sub>3</sub> region of the <sup>1</sup>H NMR spectrum (400 MHz, C<sub>6</sub>D<sub>6</sub>, 298 K) recorded 2.5 h after addition of <sup>13</sup>CO, (b) <sup>13</sup>C{<sup>1</sup>H} NMR spectrum (101 MHz, C<sub>6</sub>D<sub>6</sub>, 298 K) recorded 2.5-3 h after addition of <sup>13</sup>CO and (c) <sup>31</sup>P{<sup>1</sup>H} NMR spectrum (162 MHz, C<sub>6</sub>D<sub>6</sub>, 298 K) recorded 2.5 h after addition of <sup>13</sup>CO.

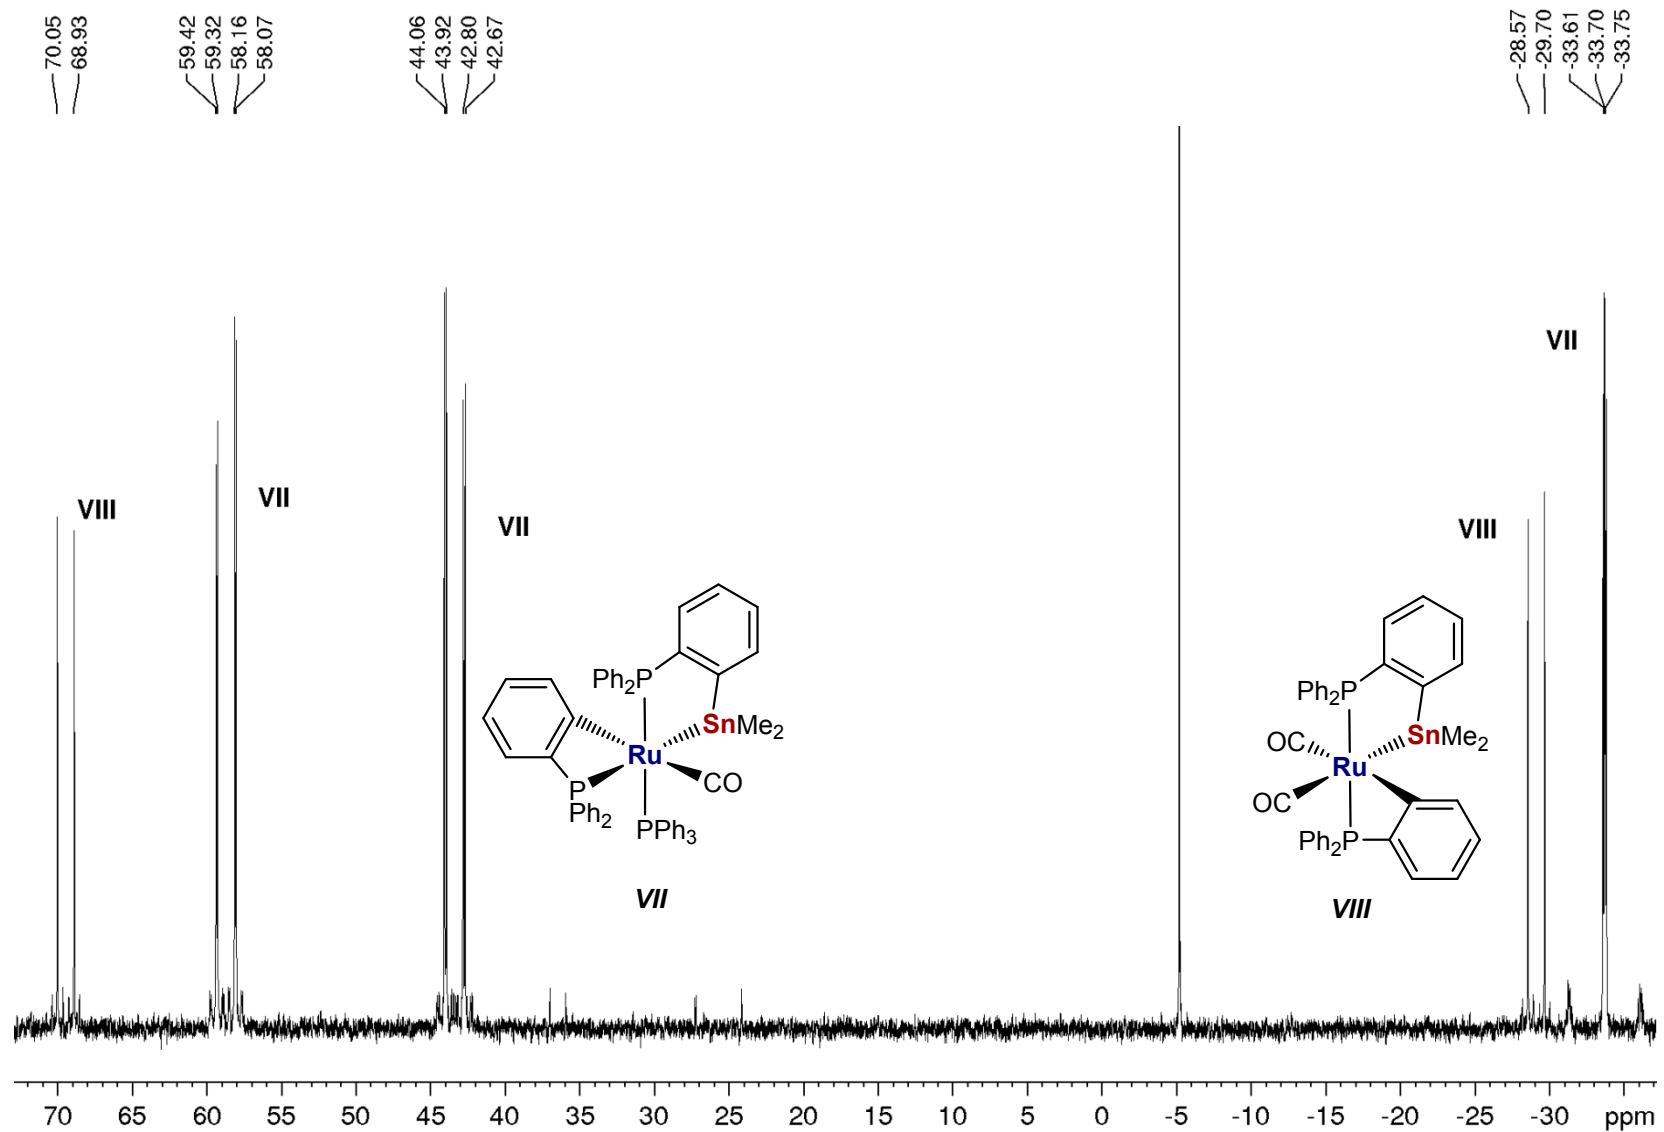

**Figure S40.**  $^{31}\text{P}\{^1\text{H}\}$  NMR spectra (202 MHz,  $\text{C}_6\text{D}_5\text{CD}_3$ , 298 K) recorded 19.5 h after exposure of **6** to 1 atm  $^{12}\text{CO}$  showing the formation of **VII** and **VIII**.

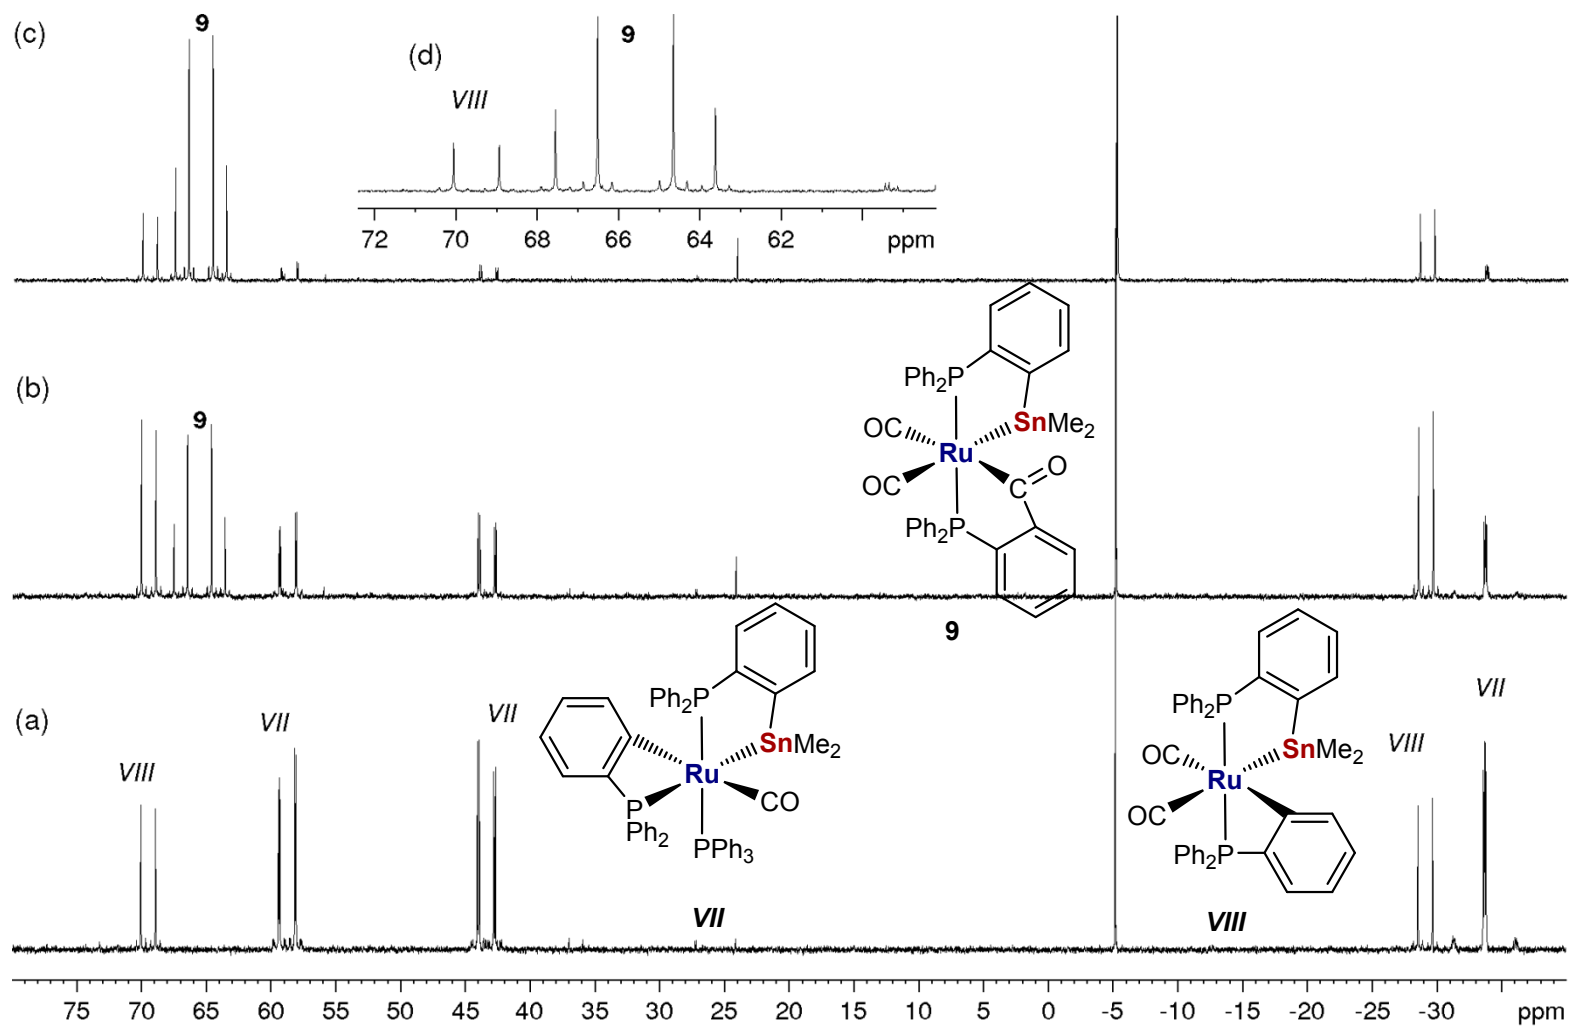

**Figure S41.**  $^{31}\text{P}\{^1\text{H}\}$  NMR spectra (202 MHz,  $\text{C}_6\text{D}_5\text{CD}_3$ , 298 K) showing evolution of species (see **Scheme 9** for structures) in the reaction of **6** with  $^{12}\text{CO}$ . (Bottom) After 19.5 h at room temperature, (middle) an additional 1 h at 80 °C and (top) a total of 3 h at 80 °C, with inset of high frequency region of spectrum.



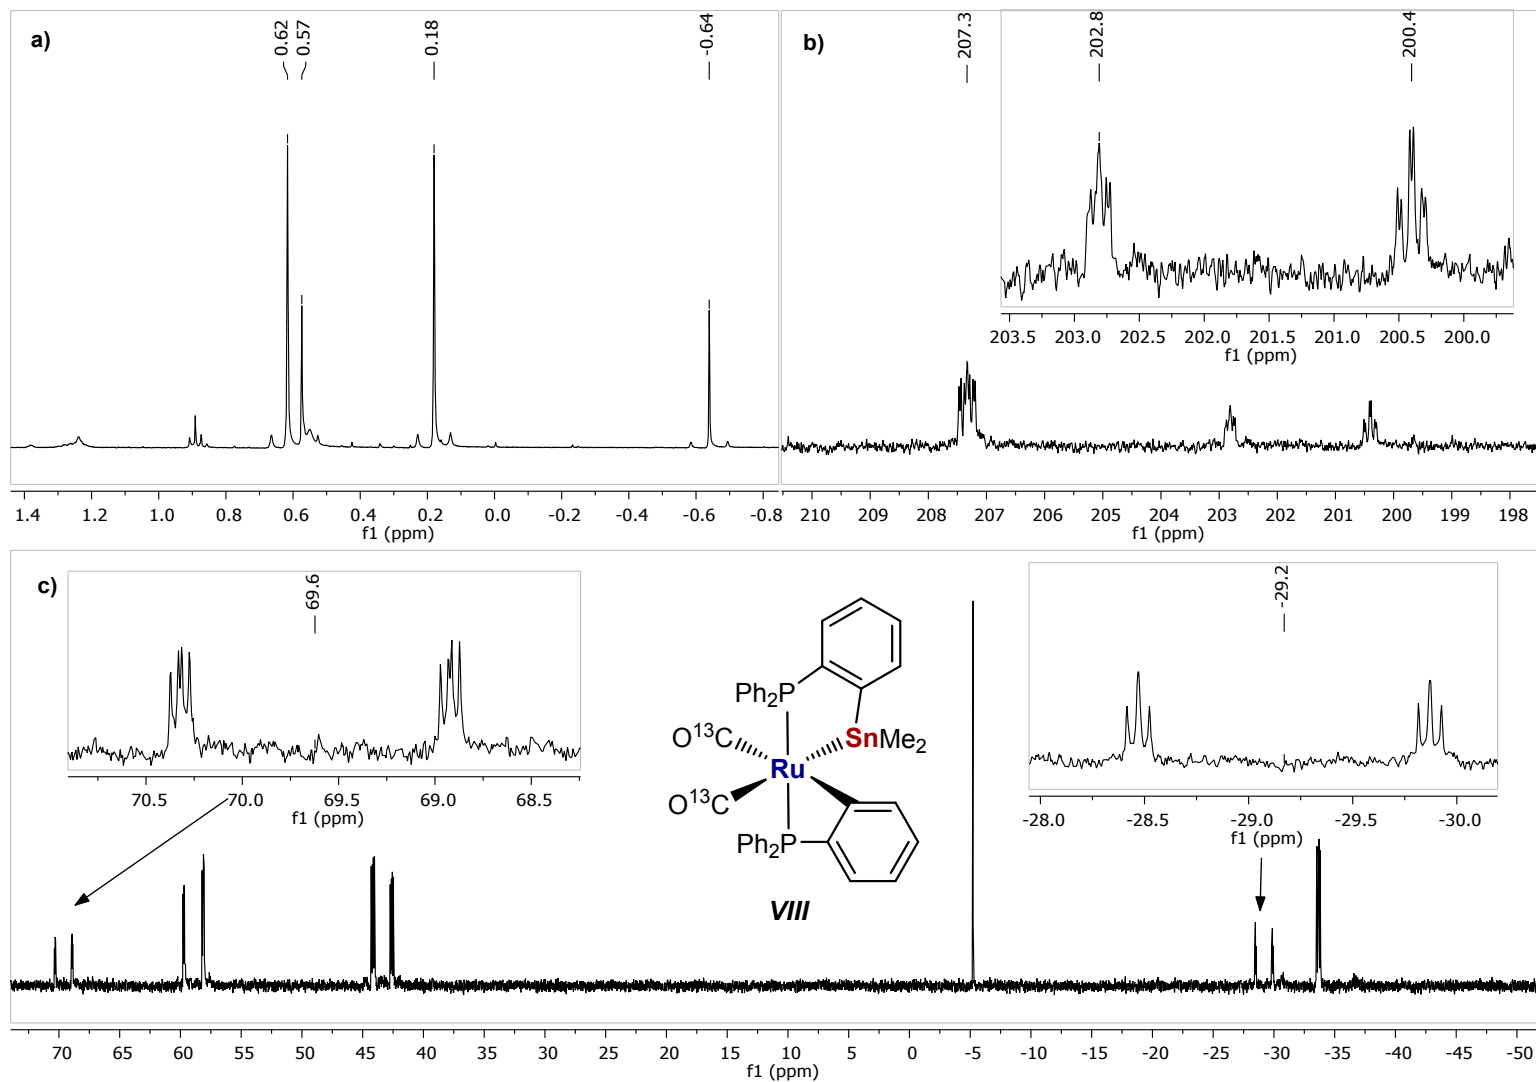

**Figure S42.** Selected NMR spectra of *VIII*- $^{13}\text{CO}$  (see **Scheme 9** for structures) formed in the reaction of **6** with  $^{13}\text{CO}$ . (a) Sn-CH $_3$  region of the  $^1\text{H}$  NMR spectrum (400 MHz,  $\text{C}_6\text{D}_6$ , 298 K) recorded 20 h after addition of  $^{13}\text{CO}$ , (b)  $^{13}\text{C}\{^1\text{H}\}$  NMR spectrum (101 MHz,  $\text{C}_6\text{D}_6$ , 298 K) recorded 20 h after addition of  $^{13}\text{CO}$  and (c)  $^{31}\text{P}\{^1\text{H}\}$  NMR spectrum (162 MHz,  $\text{C}_6\text{D}_6$ , 298 K) recorded 20 h after addition of  $^{13}\text{CO}$ .

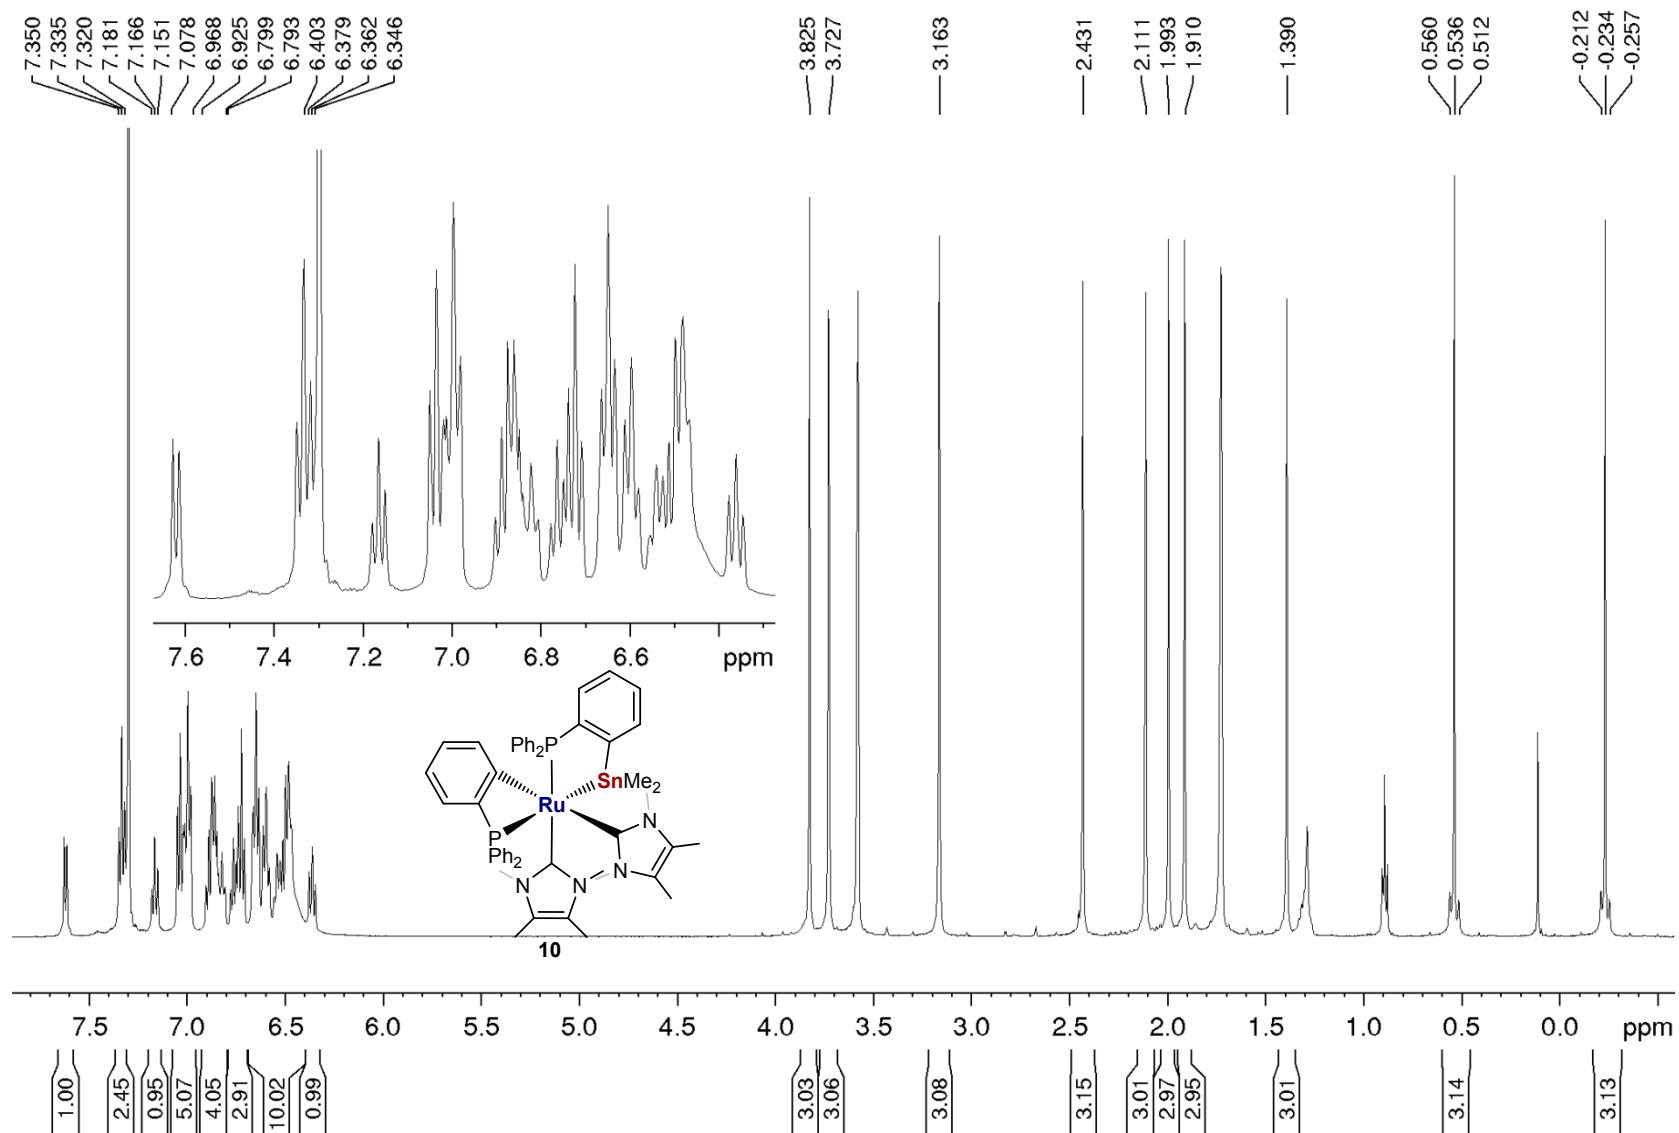

**Figure S43.**  $^1\text{H}$  NMR spectrum (500 MHz,  $\text{THF-}d_8$ , 298 K) of  $[\text{Ru}(\text{IME}_4)_2(\text{C}_6\text{H}_4\text{PPh}_2)(\text{PPh}_2\text{C}_6\text{H}_4\text{SnMe}_2)]$  **10**, with inset of aromatic region.

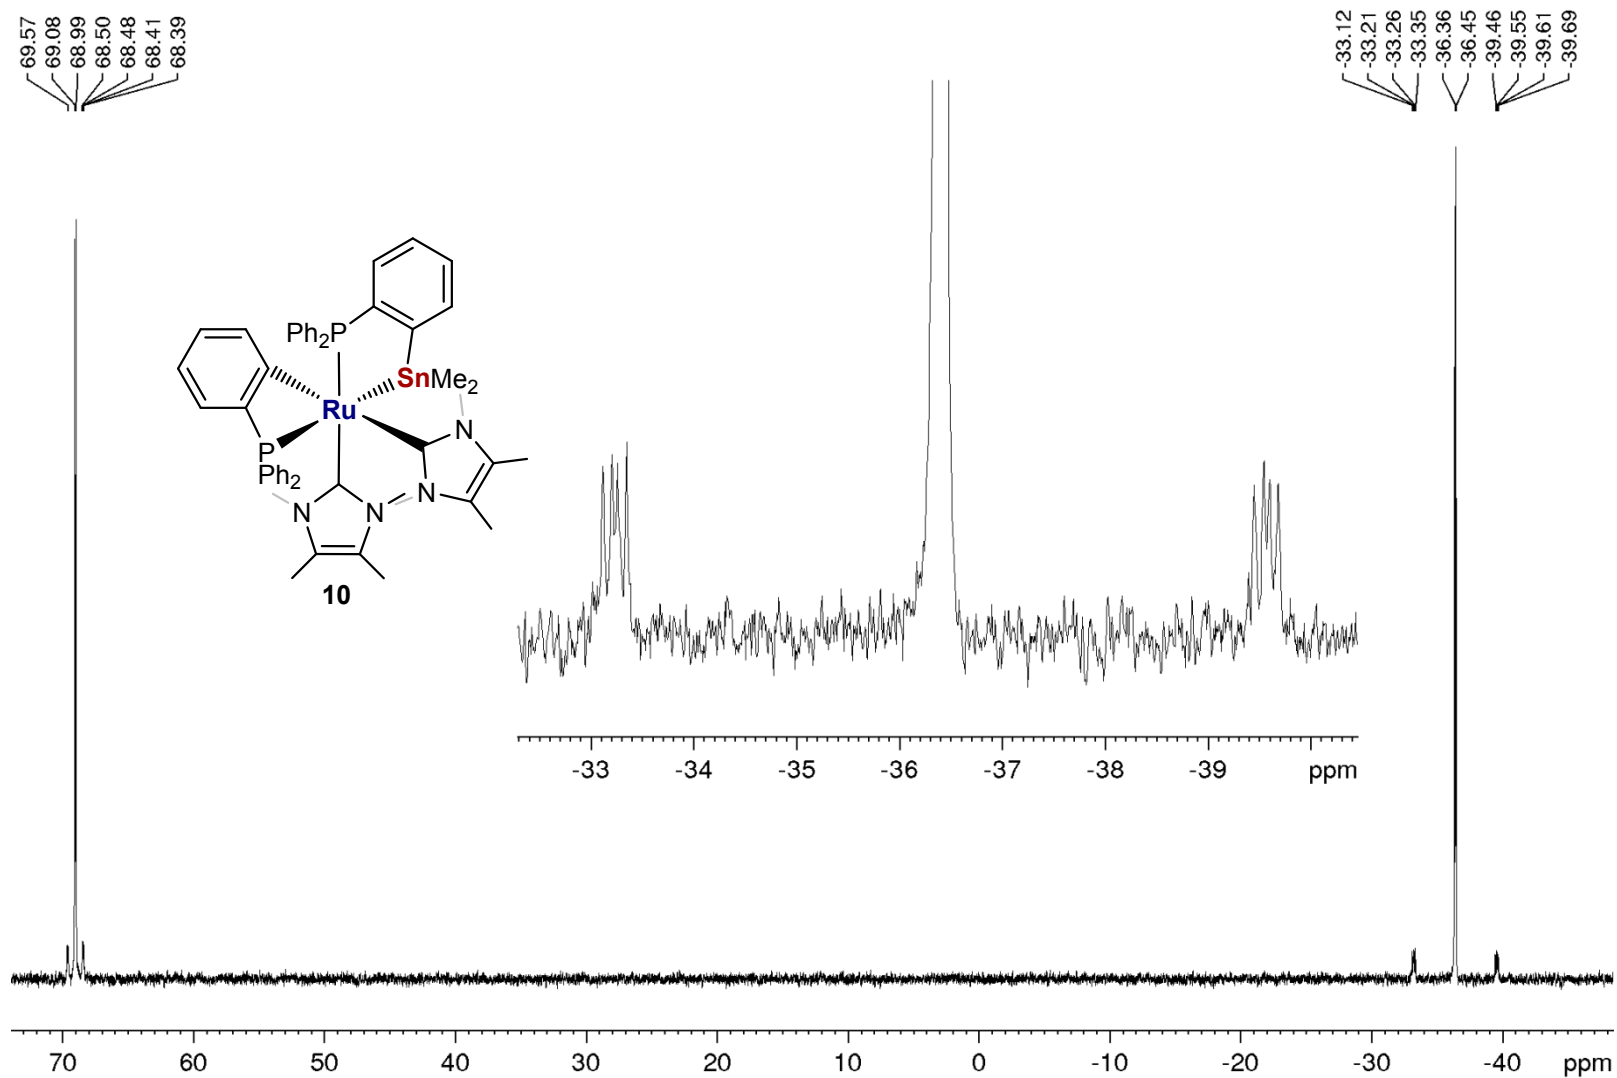

**Figure S44.**  $^{31}\text{P}\{^1\text{H}\}$  NMR spectrum (202 MHz, THF-*d*<sub>8</sub>, 298 K) of  $[\text{Ru}(\text{IME}_4)_2(\text{C}_6\text{H}_4\text{PPh}_2)(\text{PPh}_2\text{C}_6\text{H}_4\text{SnMe}_2)]$  **10**, with inset of lowest frequency signal to highlight couplings to both  $^{119}\text{Sn}$  and  $^{117}\text{Sn}$ .

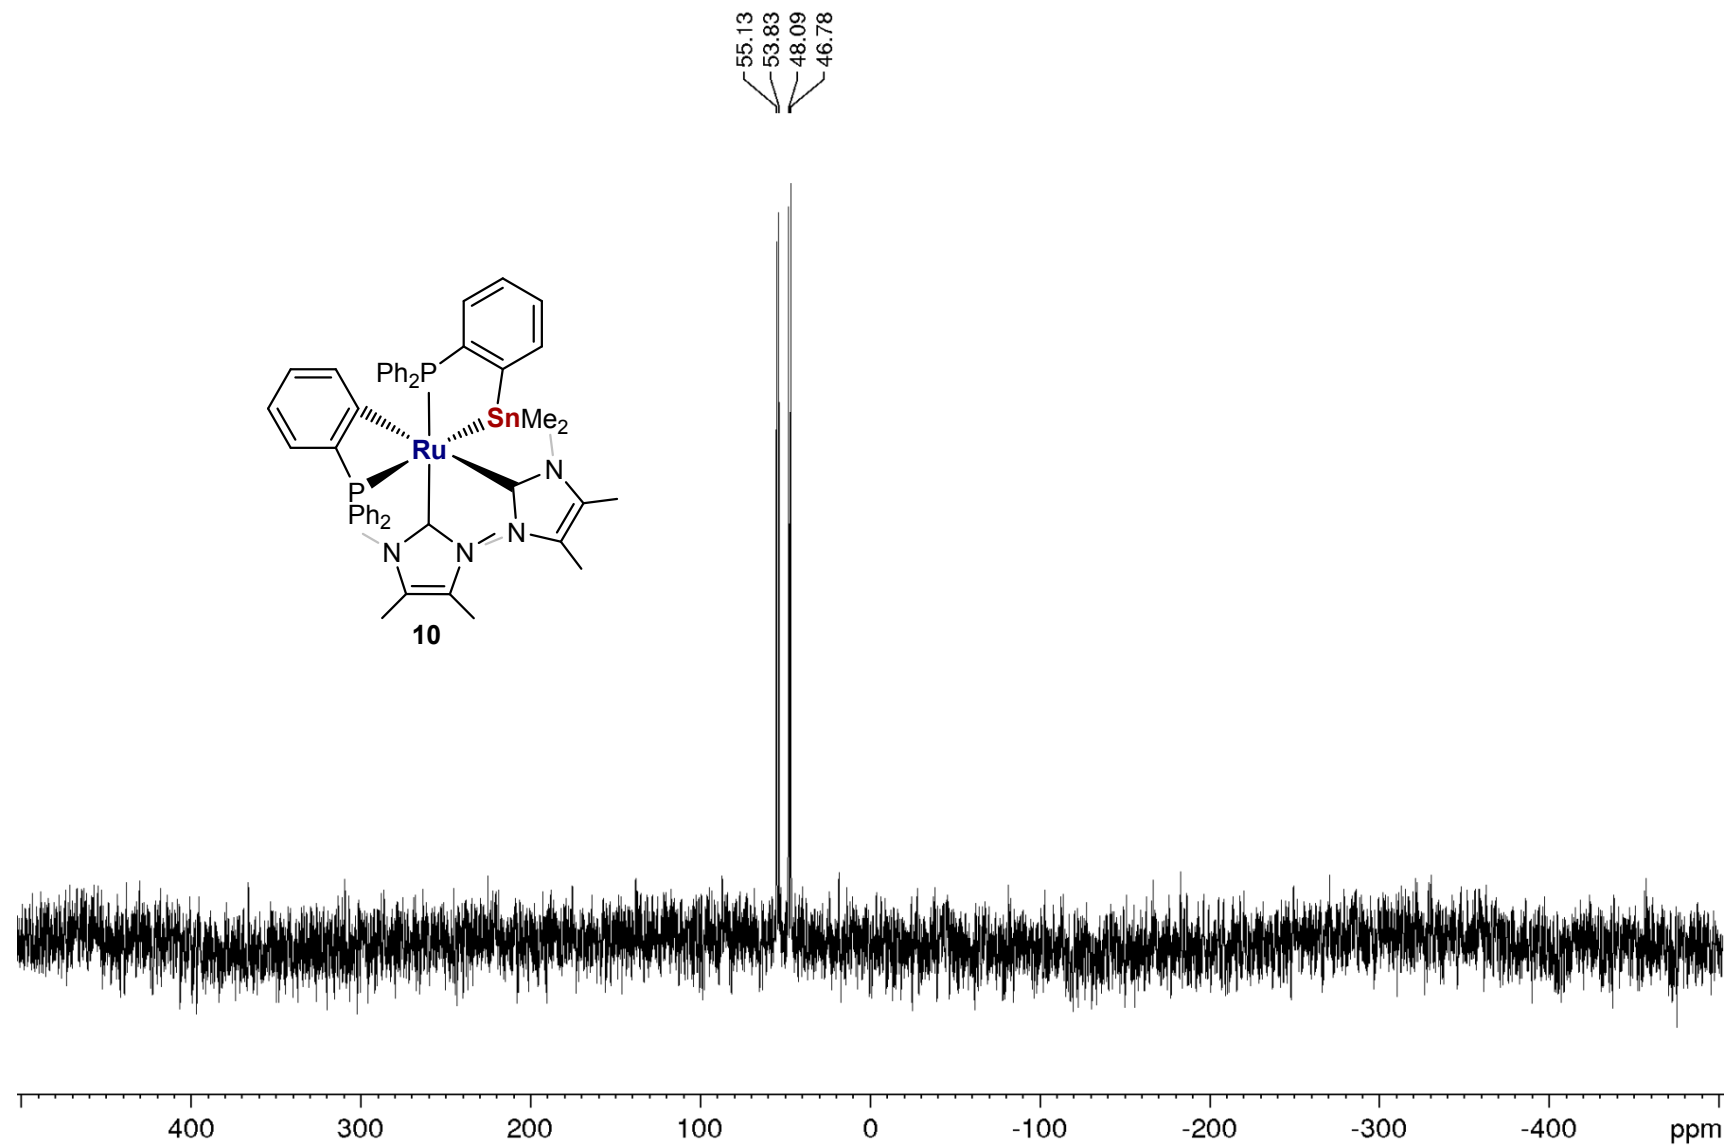

**Figure S45.**  $^{119}\text{Sn}\{^1\text{H}\}$  NMR spectrum (187 MHz, THF-*d*<sub>8</sub>, 298 K) of  $[\text{Ru}(\text{IME}_4)_2(\text{C}_6\text{H}_4\text{PPh}_2)(\text{PPh}_2\text{C}_6\text{H}_4\text{SnMe}_2)]$  **10**.

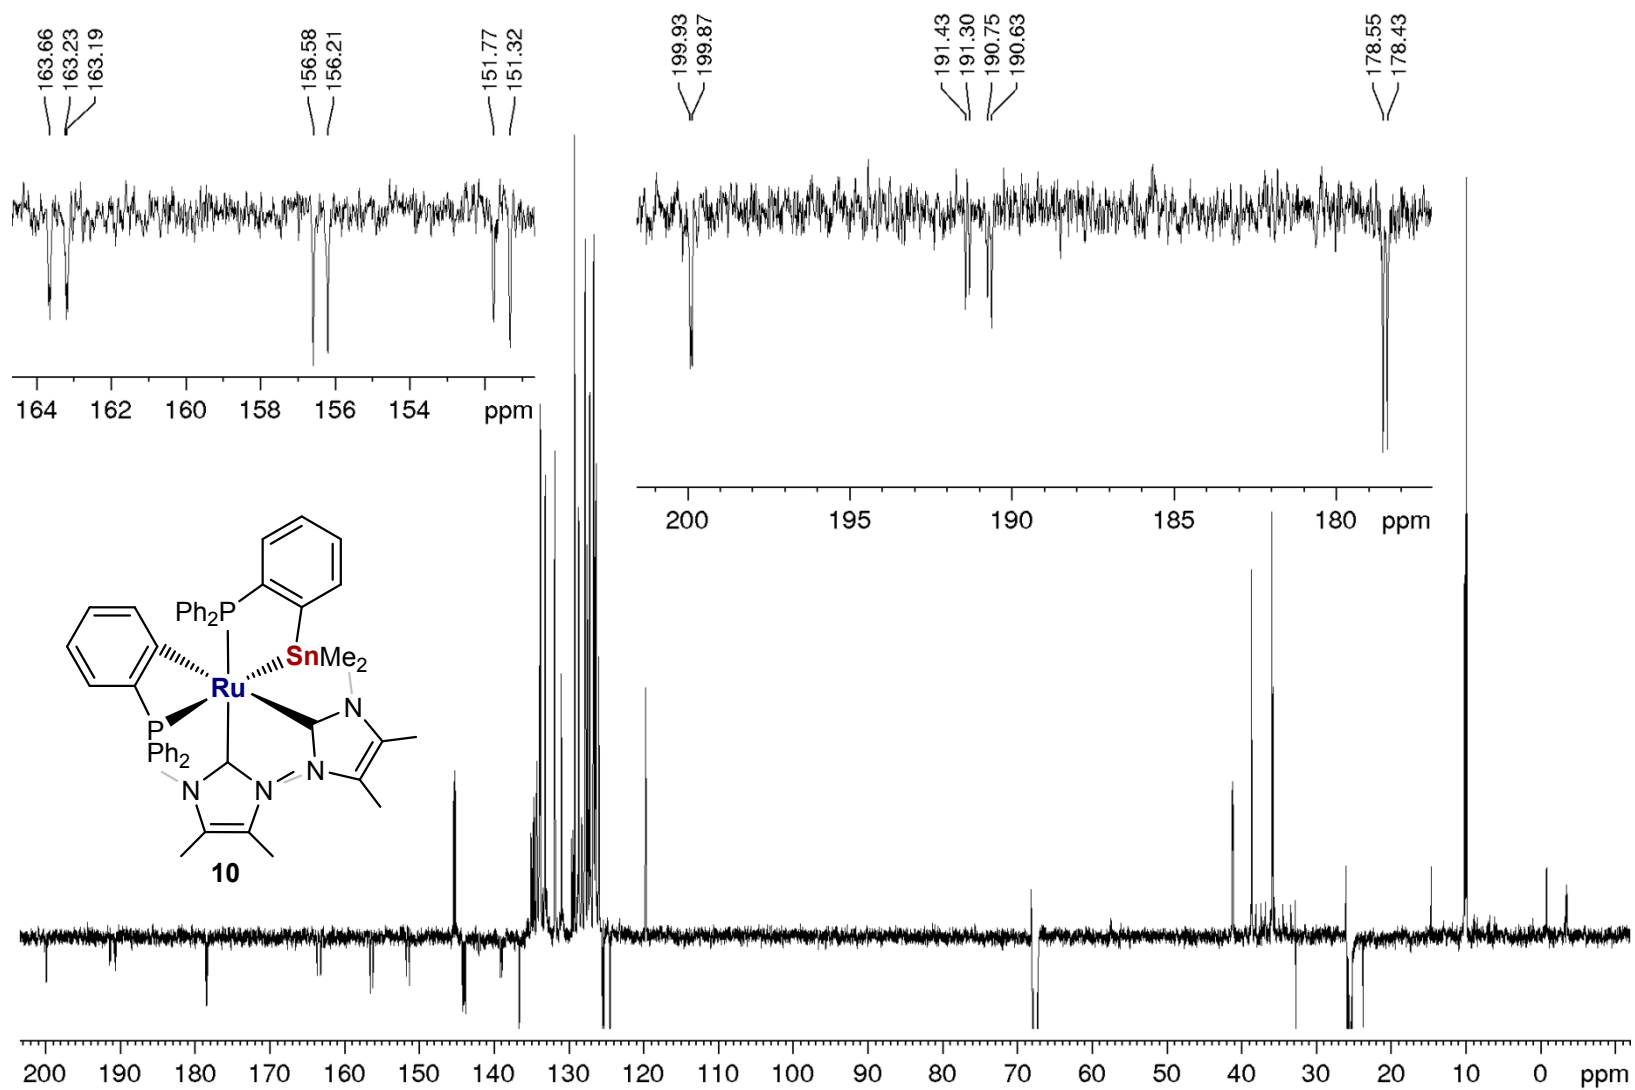

**Figure S46.** <sup>13</sup>C{<sup>1</sup>H} DEPT-Q NMR spectrum (126 MHz, THF-*d*<sub>8</sub>, 298 K) of [Ru(IME<sub>4</sub>)<sub>2</sub>(C<sub>6</sub>H<sub>4</sub>PPh<sub>2</sub>)(PPh<sub>2</sub>C<sub>6</sub>H<sub>4</sub>SnMe<sub>2</sub>)] **10**, with insets of high frequency metalated phenyl and NHC carbenic signals.

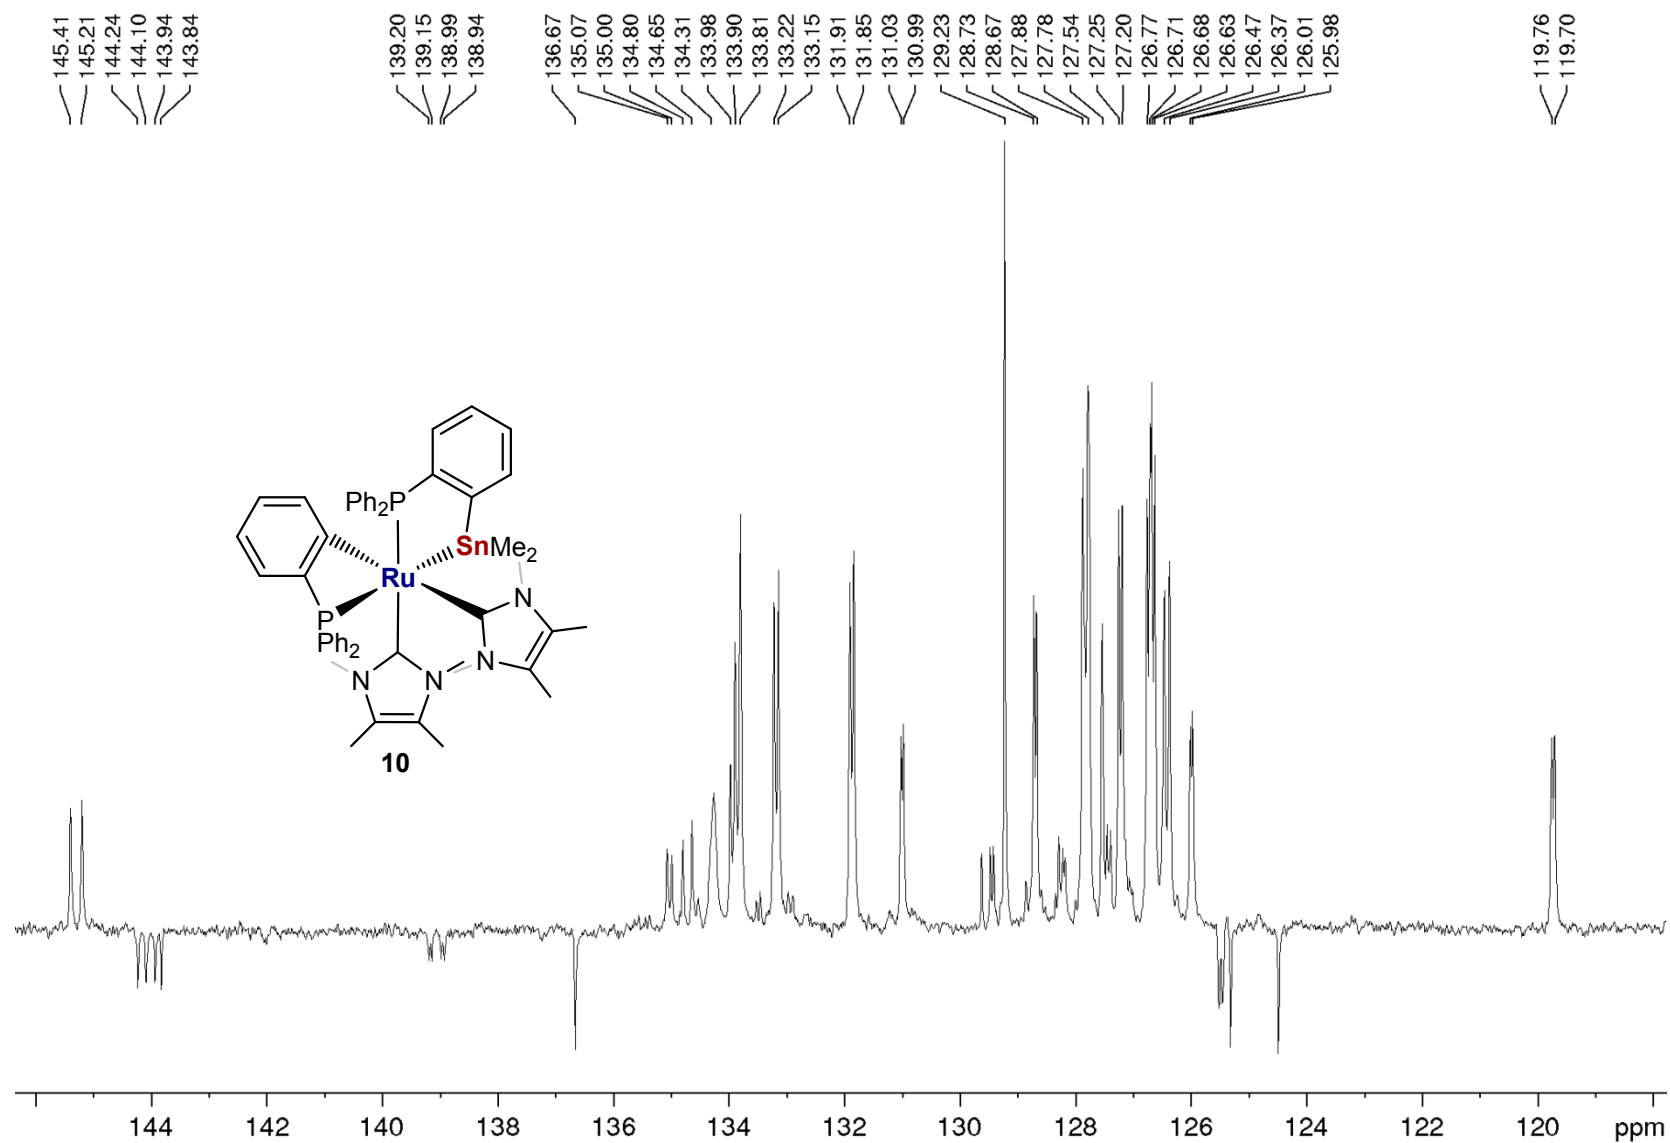

**Figure S47.** Aromatic region of the <sup>13</sup>C{<sup>1</sup>H} DEPT-Q NMR spectrum (126 MHz, THF-*d*<sub>8</sub>, 298 K) of [Ru(Ime<sub>4</sub>)<sub>2</sub>(C<sub>6</sub>H<sub>4</sub>PPh<sub>2</sub>)(PPh<sub>2</sub>C<sub>6</sub>H<sub>4</sub>SnMe<sub>2</sub>)] **10**.

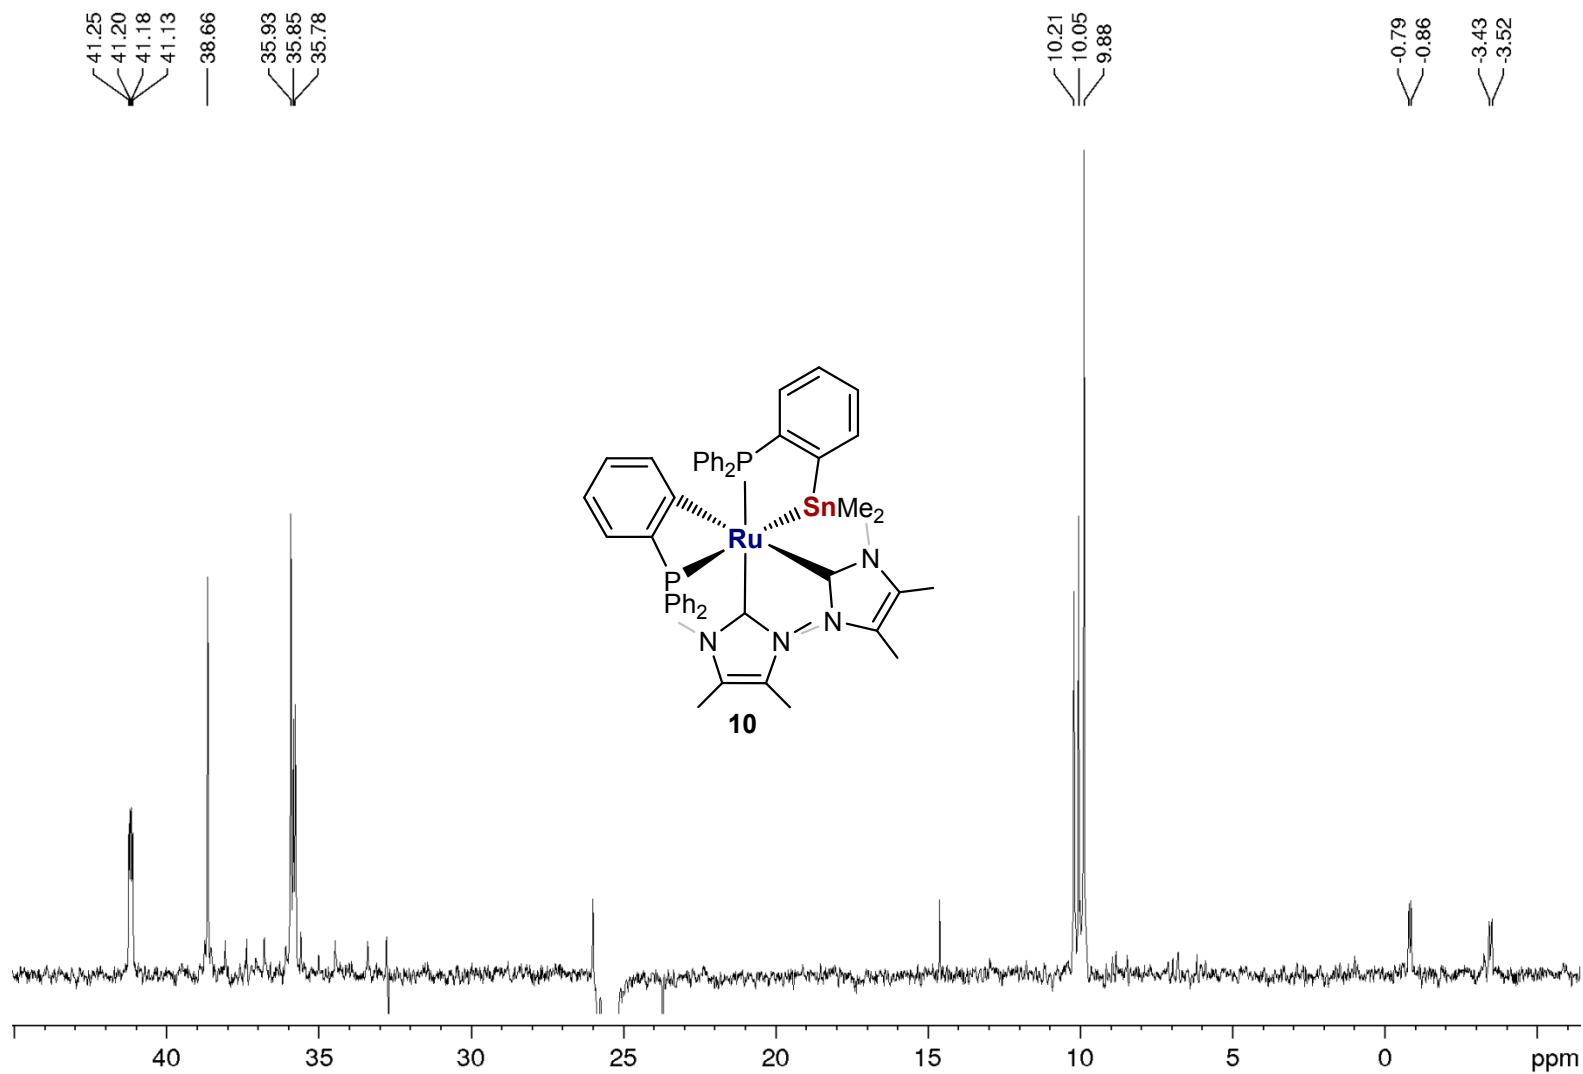

**Figure S48.** Low frequency region of  $^{13}\text{C}\{^1\text{H}\}$  DEPT-Q NMR spectrum (126 MHz, THF- $d_8$ , 298 K) of  $[\text{Ru}(\text{IME}_4)_2(\text{C}_6\text{H}_4\text{PPh}_2)(\text{PPh}_2\text{C}_6\text{H}_4\text{SnMe}_2)]$

10.

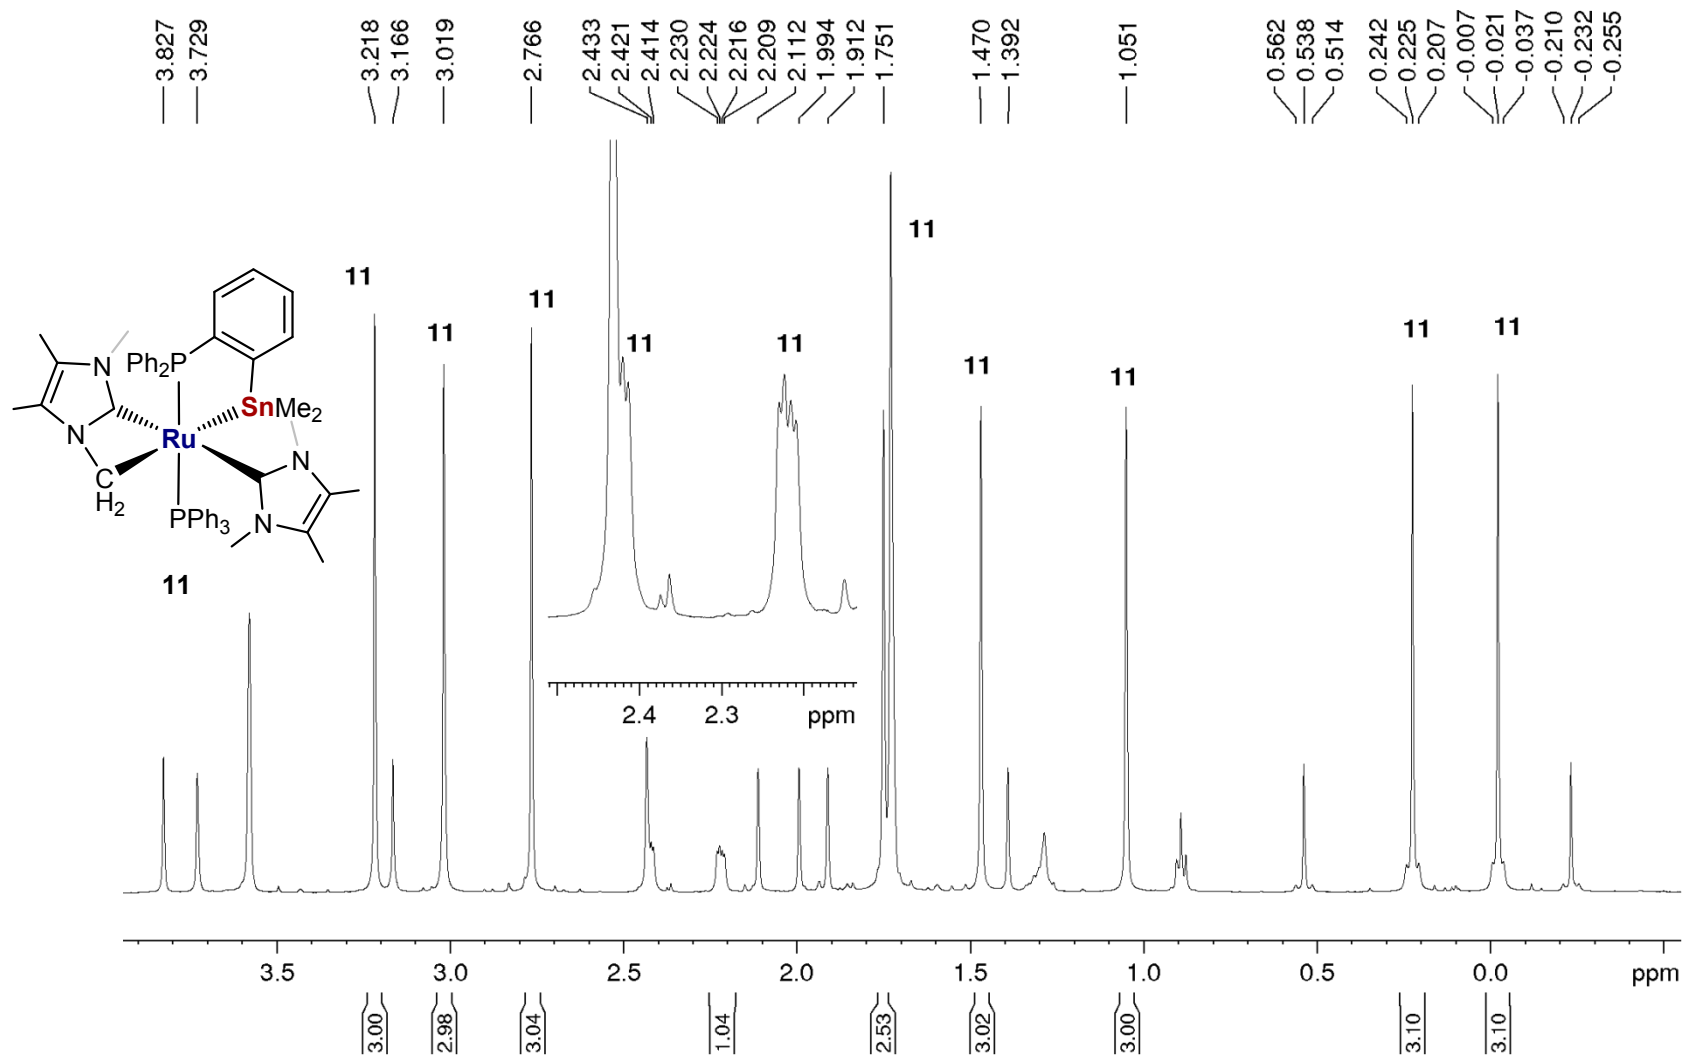

**Figure S49.** <sup>1</sup>H NMR spectrum (500 MHz, THF-*d*<sub>8</sub>, 298 K) of precipitate isolated from thermolysis (2 h, 60 °C) of [Ru(IME<sub>4</sub>)<sub>2</sub>(C<sub>6</sub>H<sub>4</sub>PPh<sub>2</sub>)(PPh<sub>2</sub>C<sub>6</sub>H<sub>4</sub>SnMe<sub>2</sub>)] **10**, showing methyl resonances of [Ru(IME<sub>4</sub>)(PPh<sub>3</sub>)(IME<sub>4</sub>') (PPh<sub>2</sub>C<sub>6</sub>H<sub>4</sub>SnMe<sub>2</sub>)] **11**. Inset shows inequivalent CH<sub>2</sub> protons of IME<sub>4</sub>'.



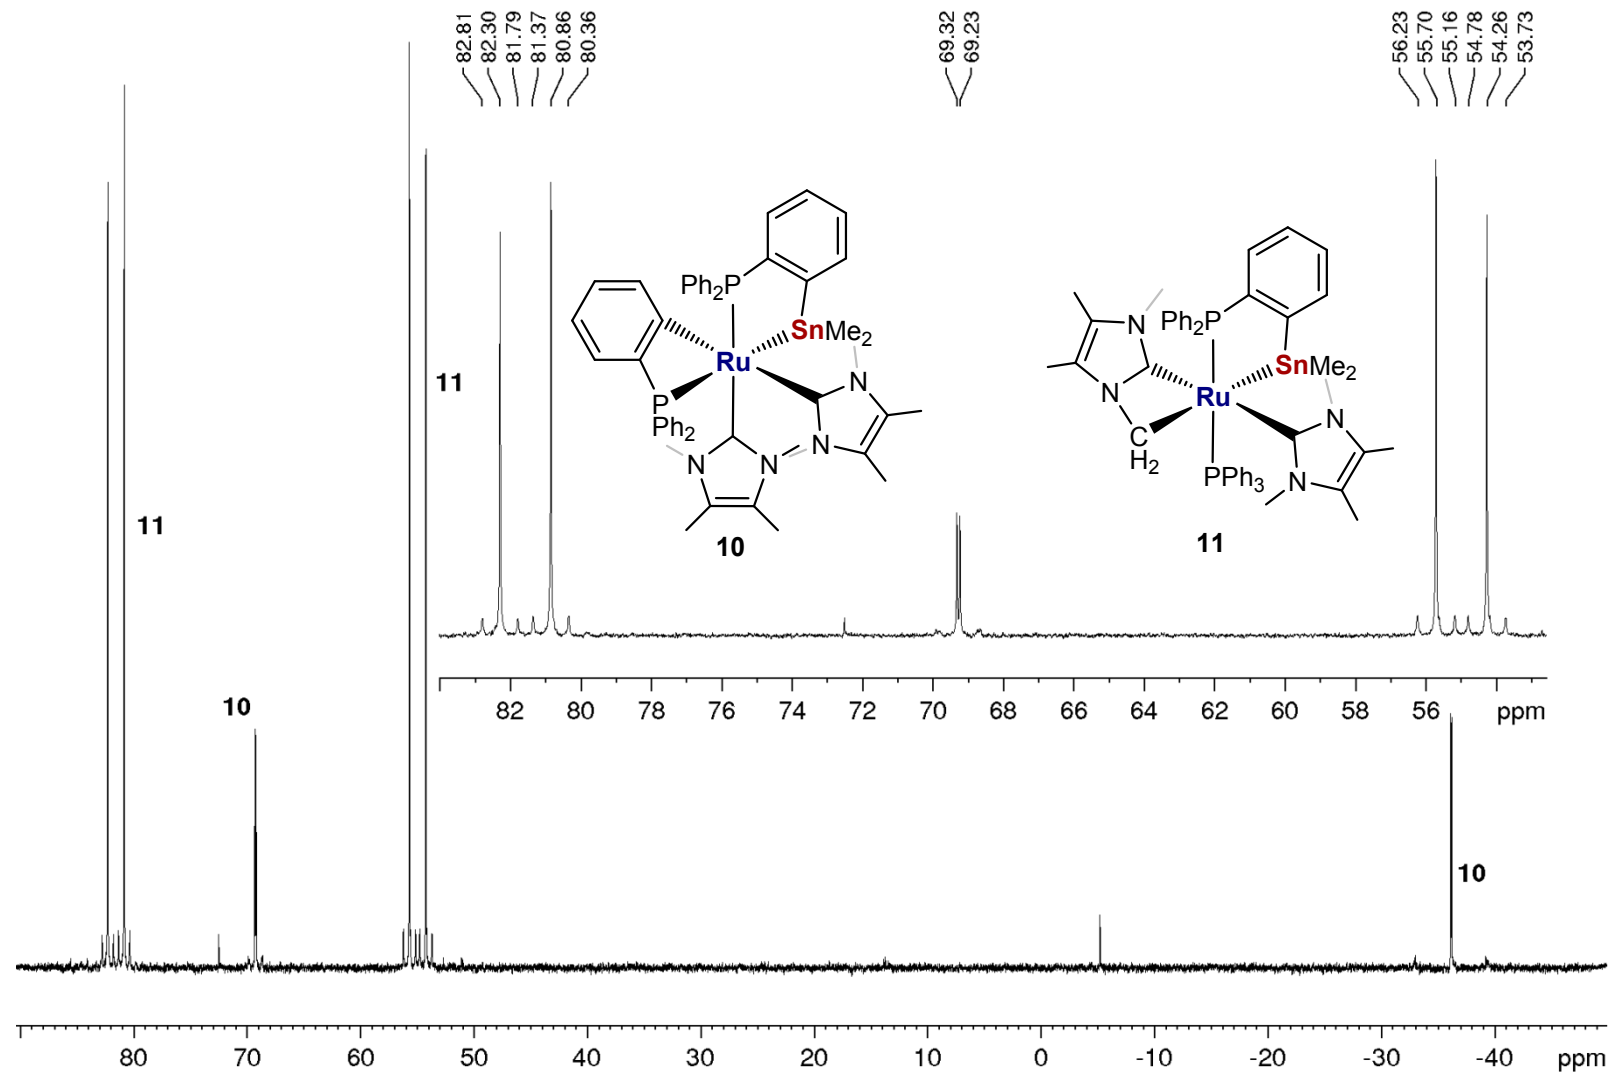

**Figure S50.**  $^{31}\text{P}\{^1\text{H}\}$  NMR spectrum (202 MHz,  $\text{THF-}d_8$ , 298 K) precipitate isolated following thermolysis (2 h, 60 °C) of  $[\text{Ru}(\text{IME-}_4)_2(\text{C}_6\text{H}_4\text{PPh}_2)(\text{PPh}_2\text{C}_6\text{H}_4\text{SnMe}_2)]$  **10**. Inset shows an expansion of the signals for  $[\text{Ru}(\text{IME}_4)(\text{PPh}_3)(\text{IME}_4')(\text{PPh}_2\text{C}_6\text{H}_4\text{SnMe}_2)]$  **11**.

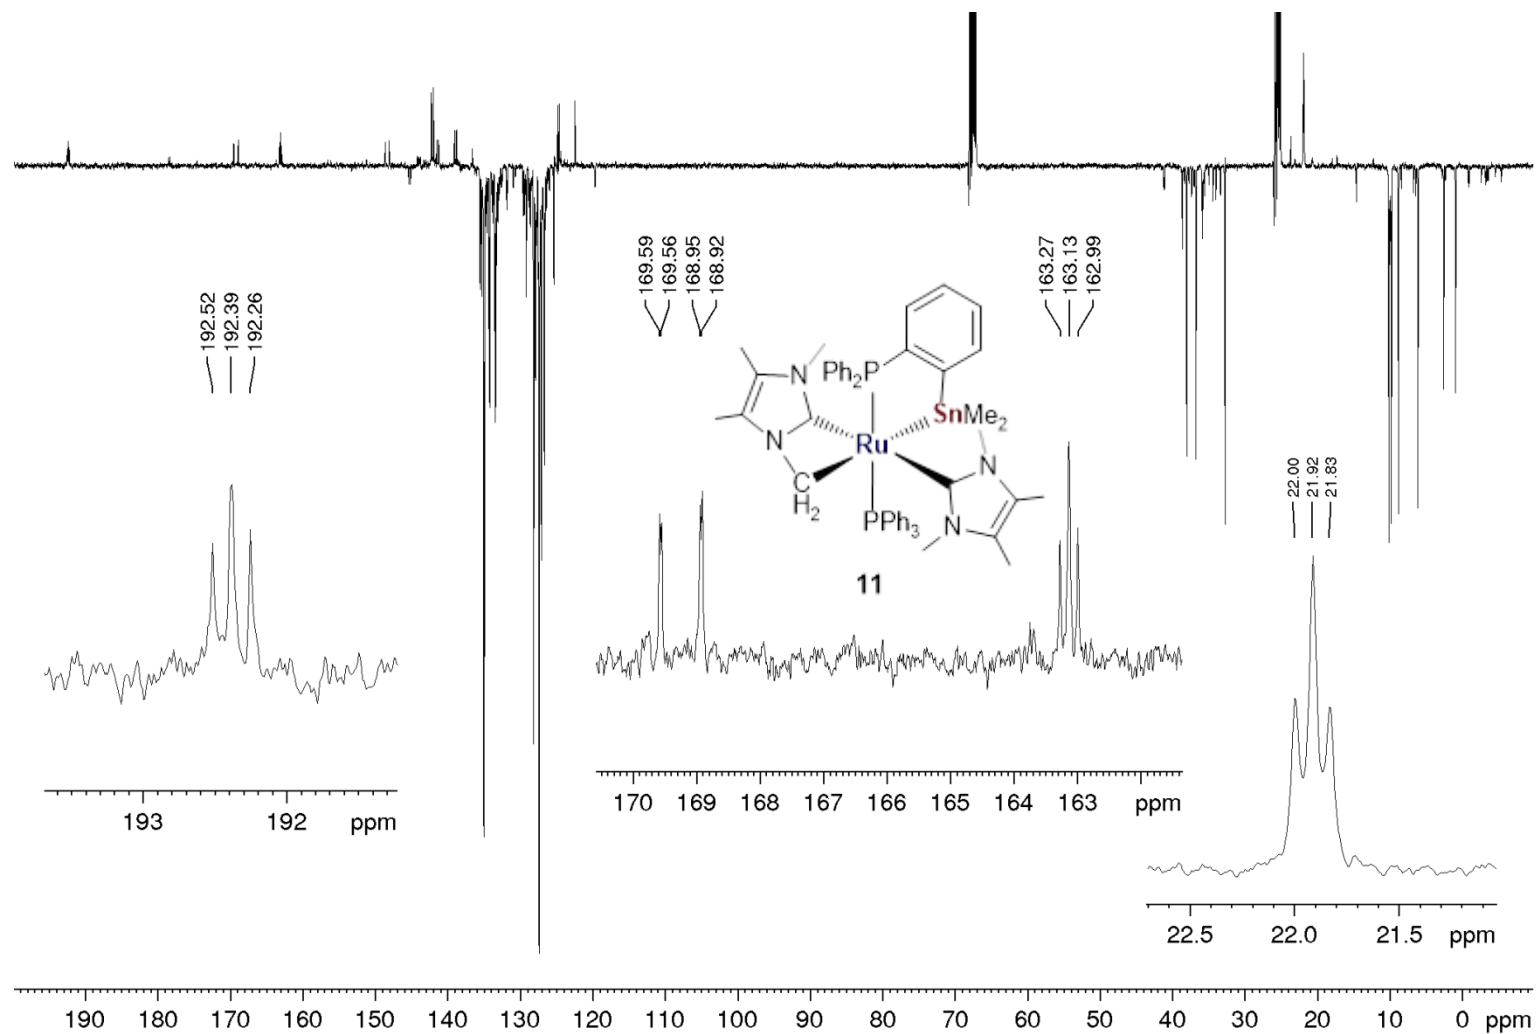

**Figure S51.**  $^{13}\text{C}\{^1\text{H}\}$  DEPT-Q NMR spectrum (101 MHz, THF-*d*<sub>8</sub>, 298 K) precipitate isolated following thermolysis (2 h, 60 °C) of  $[\text{Ru}(\text{IME}_4)_2(\text{C}_6\text{H}_4\text{PPh}_2)(\text{PPh}_2\text{C}_6\text{H}_4\text{SnMe}_2)]$  **10**. The spectrum comprises mainly of signals for  $[\text{Ru}(\text{IME}_4)(\text{PPh}_3)(\text{IME}_4')(\text{PPh}_2\text{C}_6\text{H}_4\text{SnMe}_2)]$  **11**; those at high frequency, and the low frequency signal of the Ru-CH<sub>2</sub>, are shown in insets.

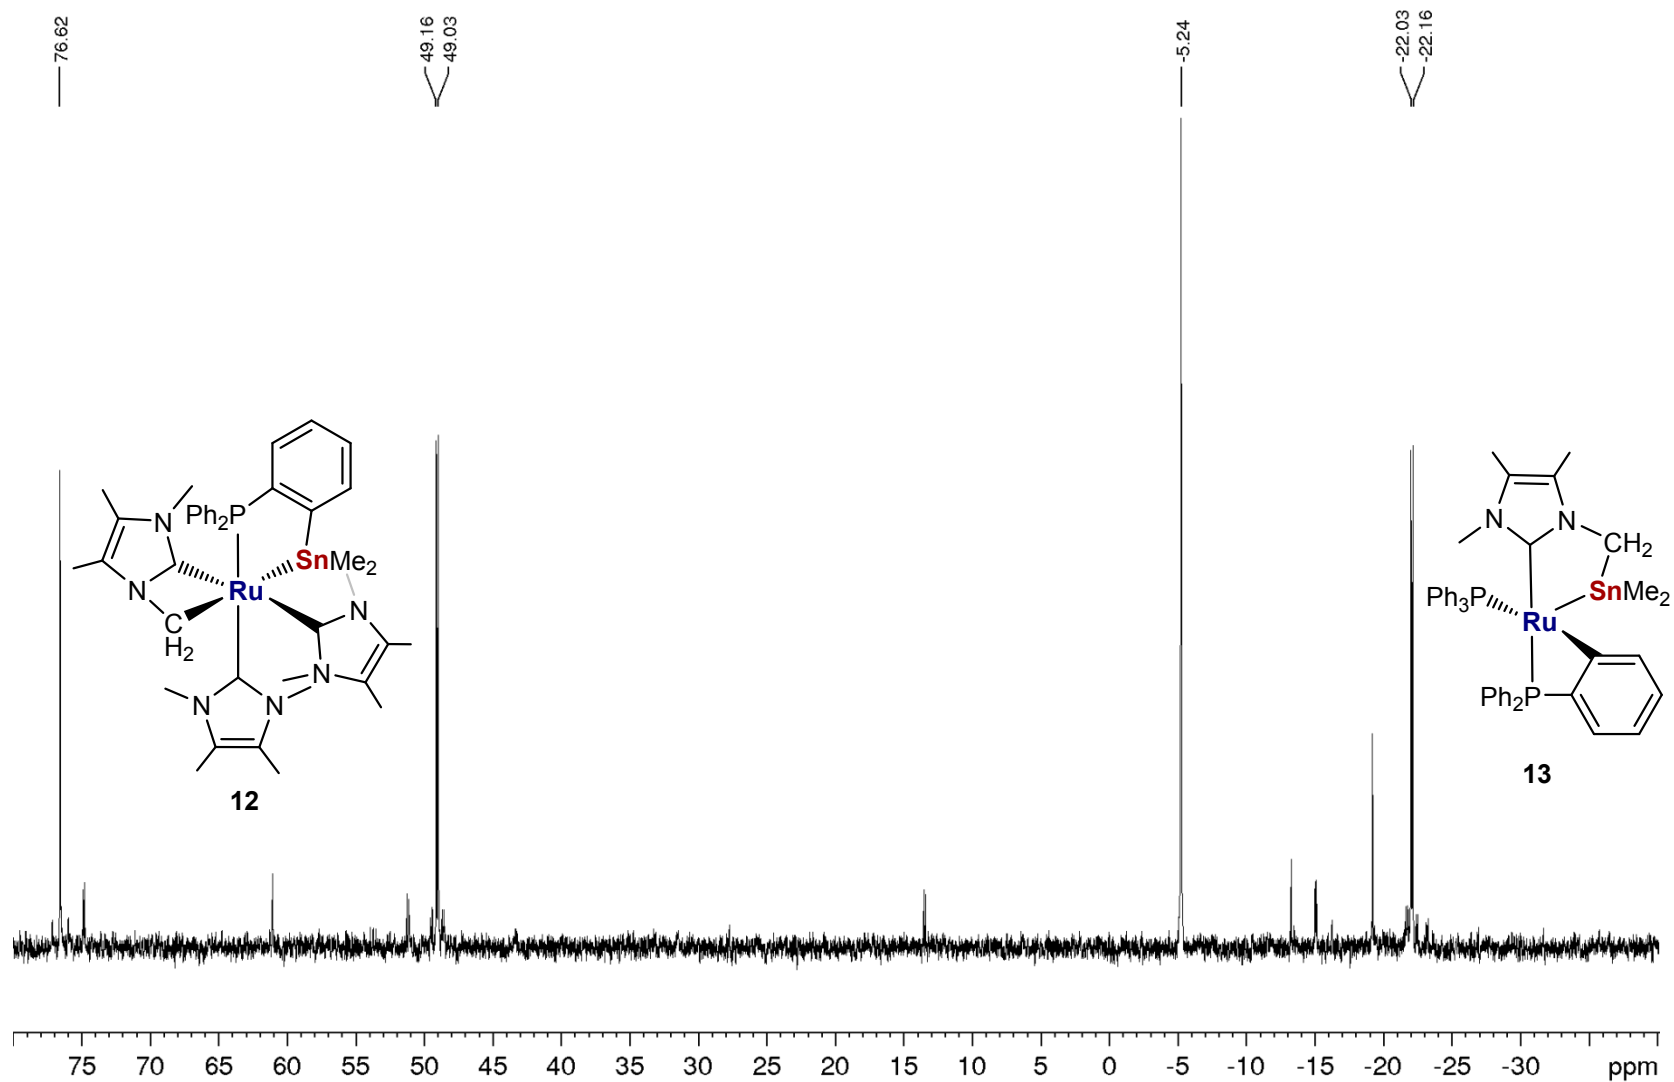

**Figure S52.**  $^{31}\text{P}\{^1\text{H}\}$  NMR spectrum (162 MHz, 298 K) after thermolysis (2 h, 120 °C) of  $[\text{Ru}(\text{IME}_4)_2(\text{C}_6\text{H}_4\text{PPh}_2)(\text{PPh}_2\text{C}_6\text{H}_4\text{SnMe}_2)]$  **10** in  $\text{C}_6\text{D}_5\text{CD}_3$  showing formation of  $[\text{Ru}(\text{IME}_4)_2(\text{IME}_4')(\text{PPh}_2\text{C}_6\text{H}_4\text{SnMe}_2)]$  **12** ( $\delta$  76) and  $[\text{Ru}(\text{PPh}_3)(\text{IME}_4'\text{-SnMe}_2)(\text{C}_6\text{H}_4\text{PPh}_2)]$  **13** ( $\delta$  49 and -22).

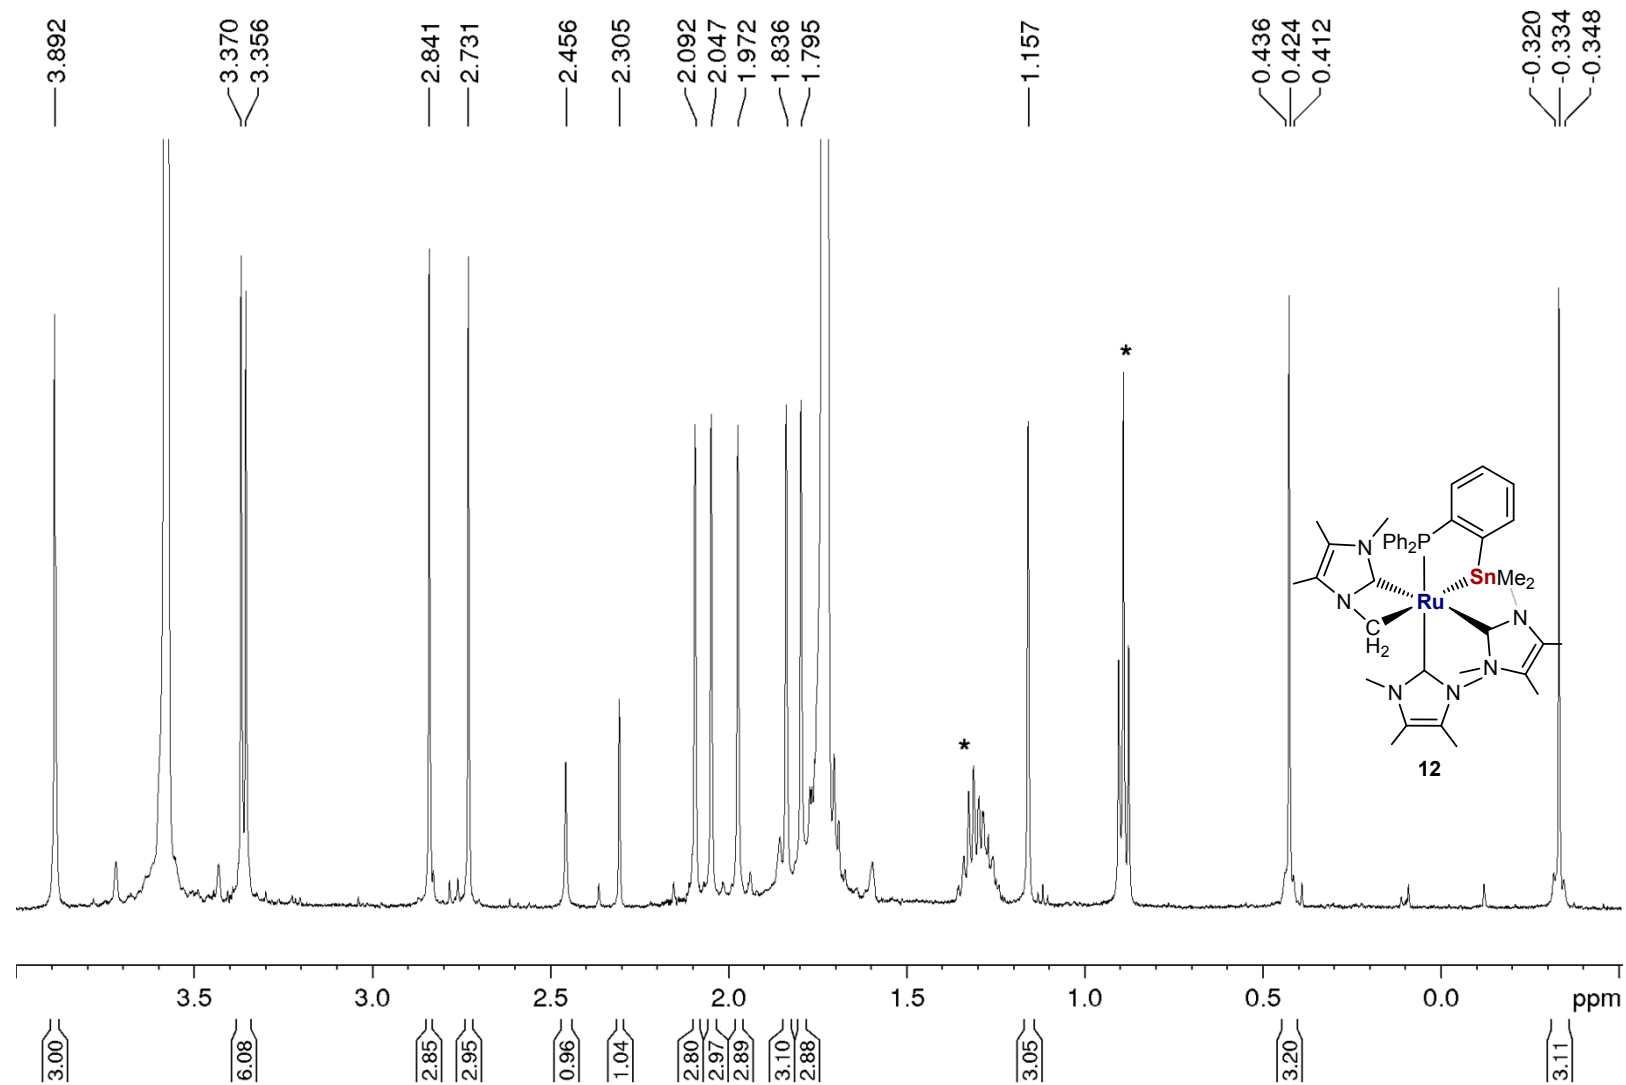

**Figure S53.** Methyl region of the  $^1\text{H}$  NMR spectrum (400 MHz,  $\text{THF-}d_8$ , 298 K) of a crystal picked sample of  $[\text{Ru}(\text{IMe}_4)_2(\text{IMe}_4')(\text{PPh}_2\text{C}_6\text{H}_4\text{SnMe}_2)]$

12. \* = hexane.

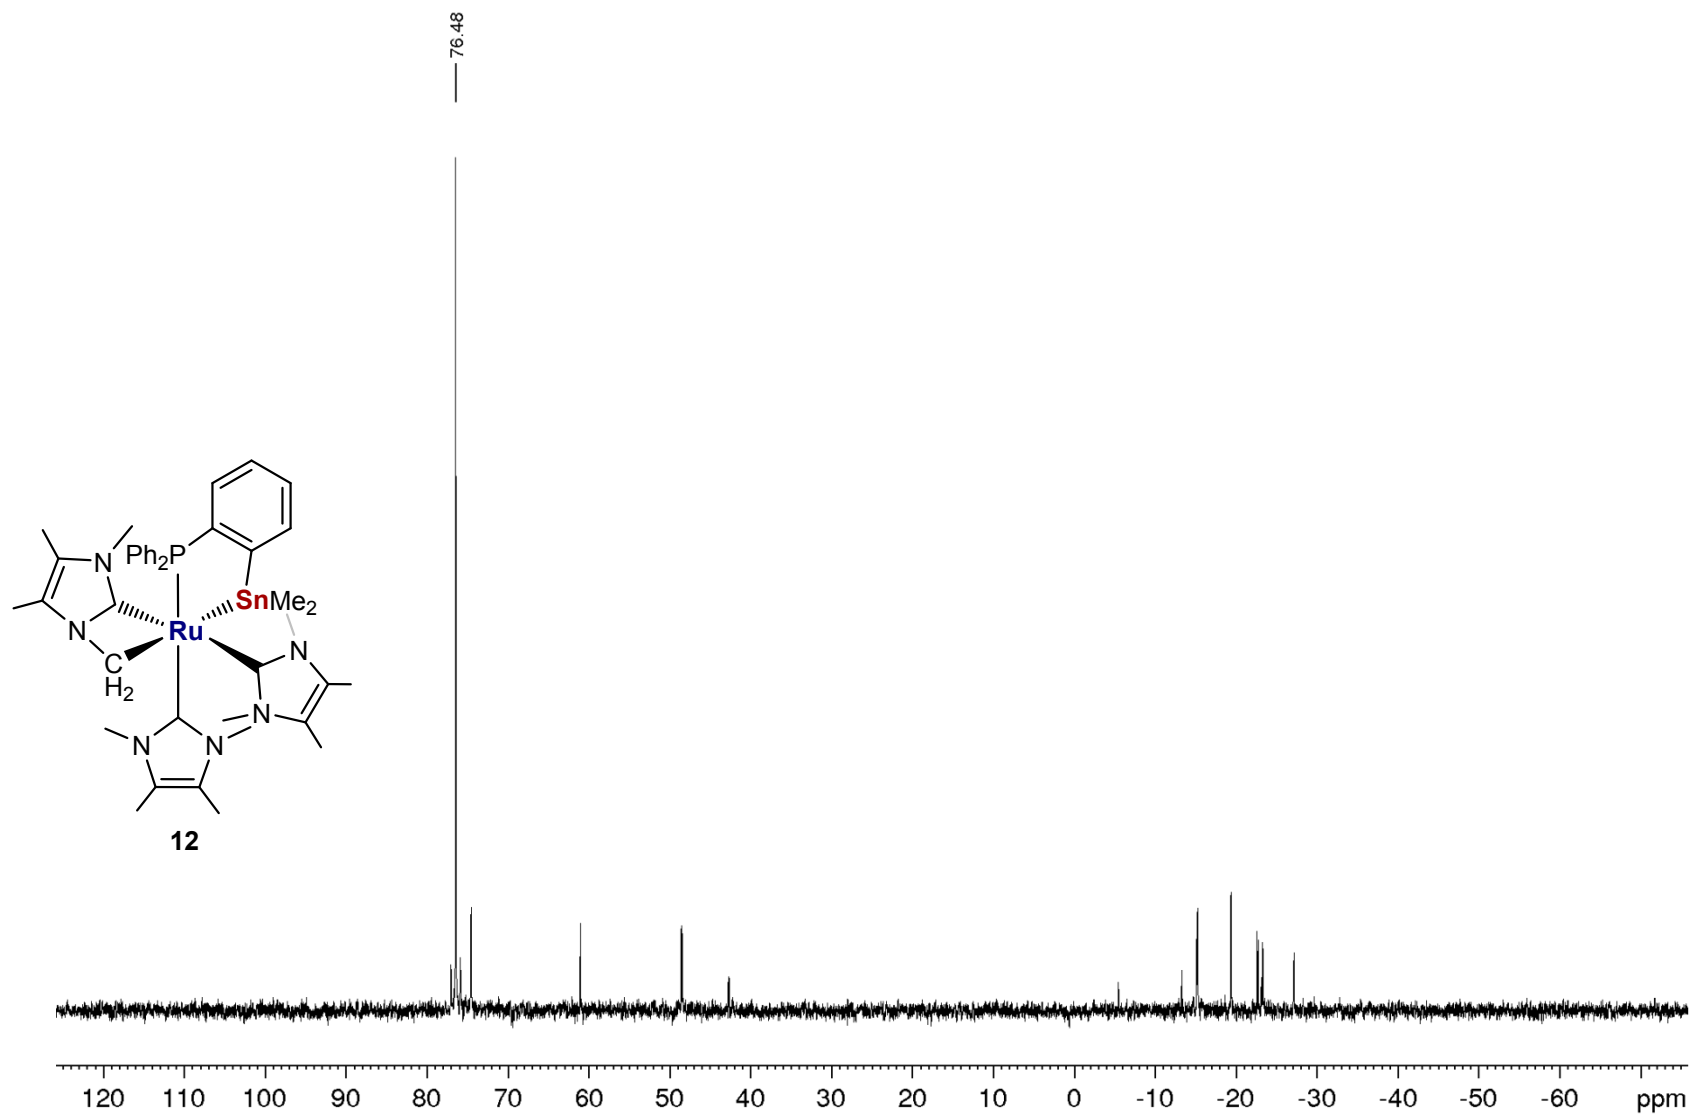

**Figure S54.**  $^{31}\text{P}\{^1\text{H}\}$  NMR spectrum (162 MHz, THF- $d_8$ , 298 K) of a crystal picked sample of  $[\text{Ru}(\text{IMe}_4)_2(\text{IMe}_4')(\text{PPh}_2\text{C}_6\text{H}_4\text{SnMe}_2)]$  **12**.

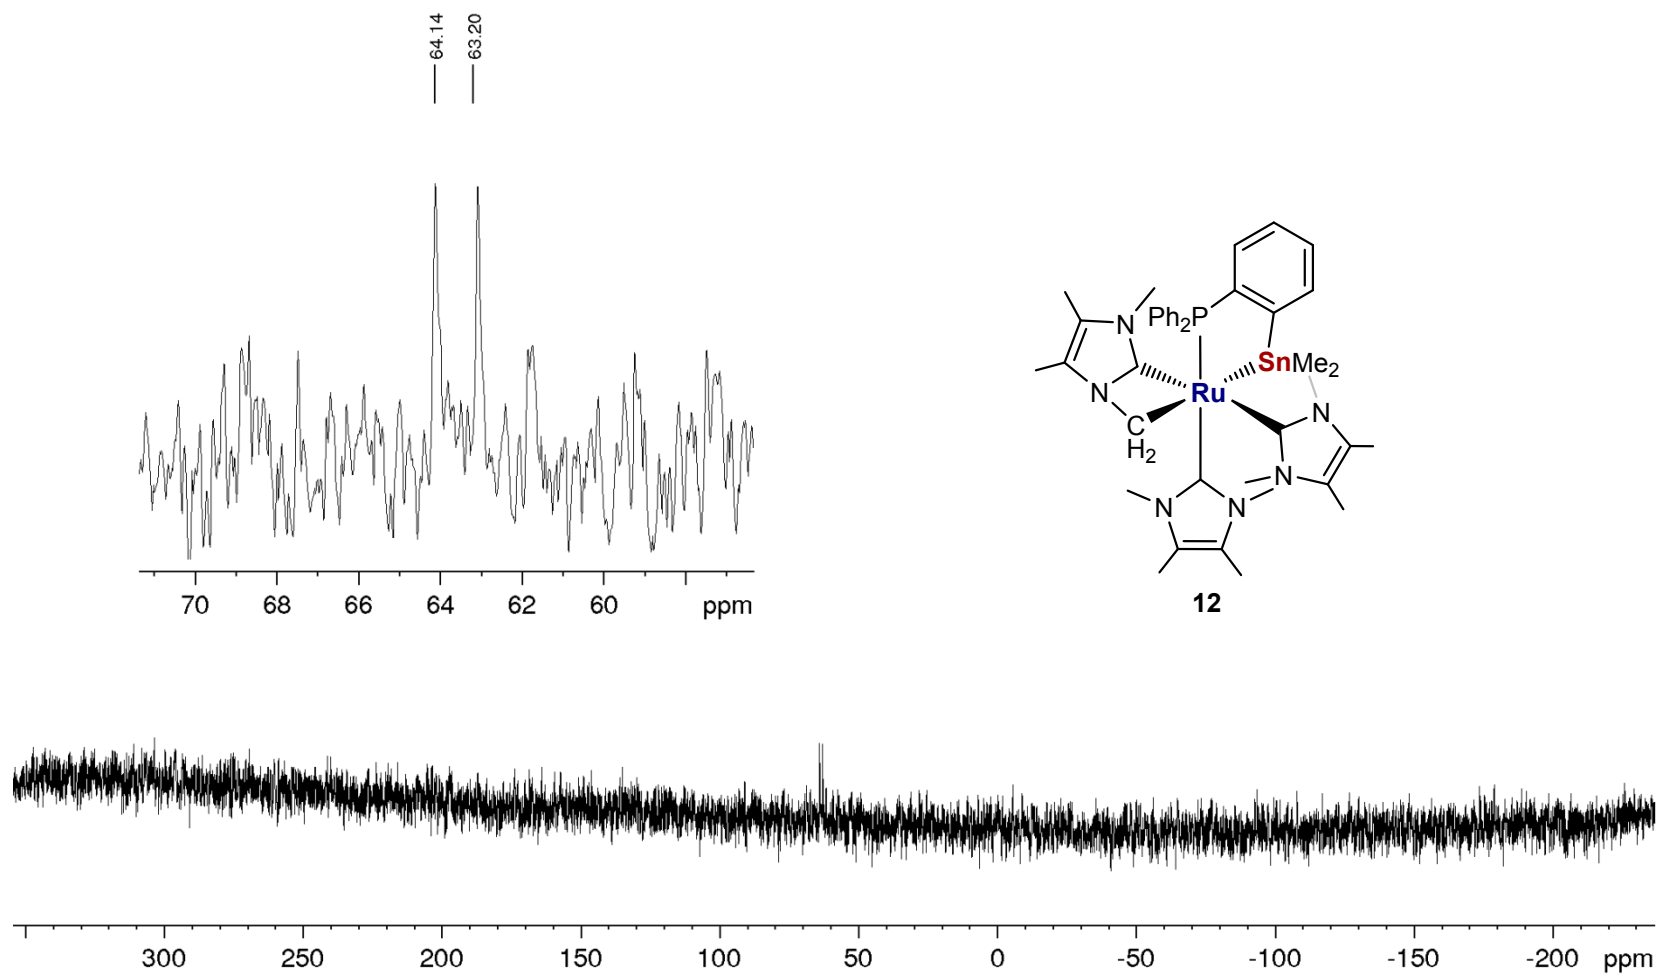

**Figure S55.**  $^{119}\text{Sn}\{^1\text{H}\}$  NMR spectrum (187 MHz, THF-*d*<sub>8</sub>, 298 K) of a crystal picked sample of  $[\text{Ru}(\text{IME}_4)_2(\text{IME}_4')(\text{PPh}_2\text{C}_6\text{H}_4\text{SnMe}_2)]$  **12**.

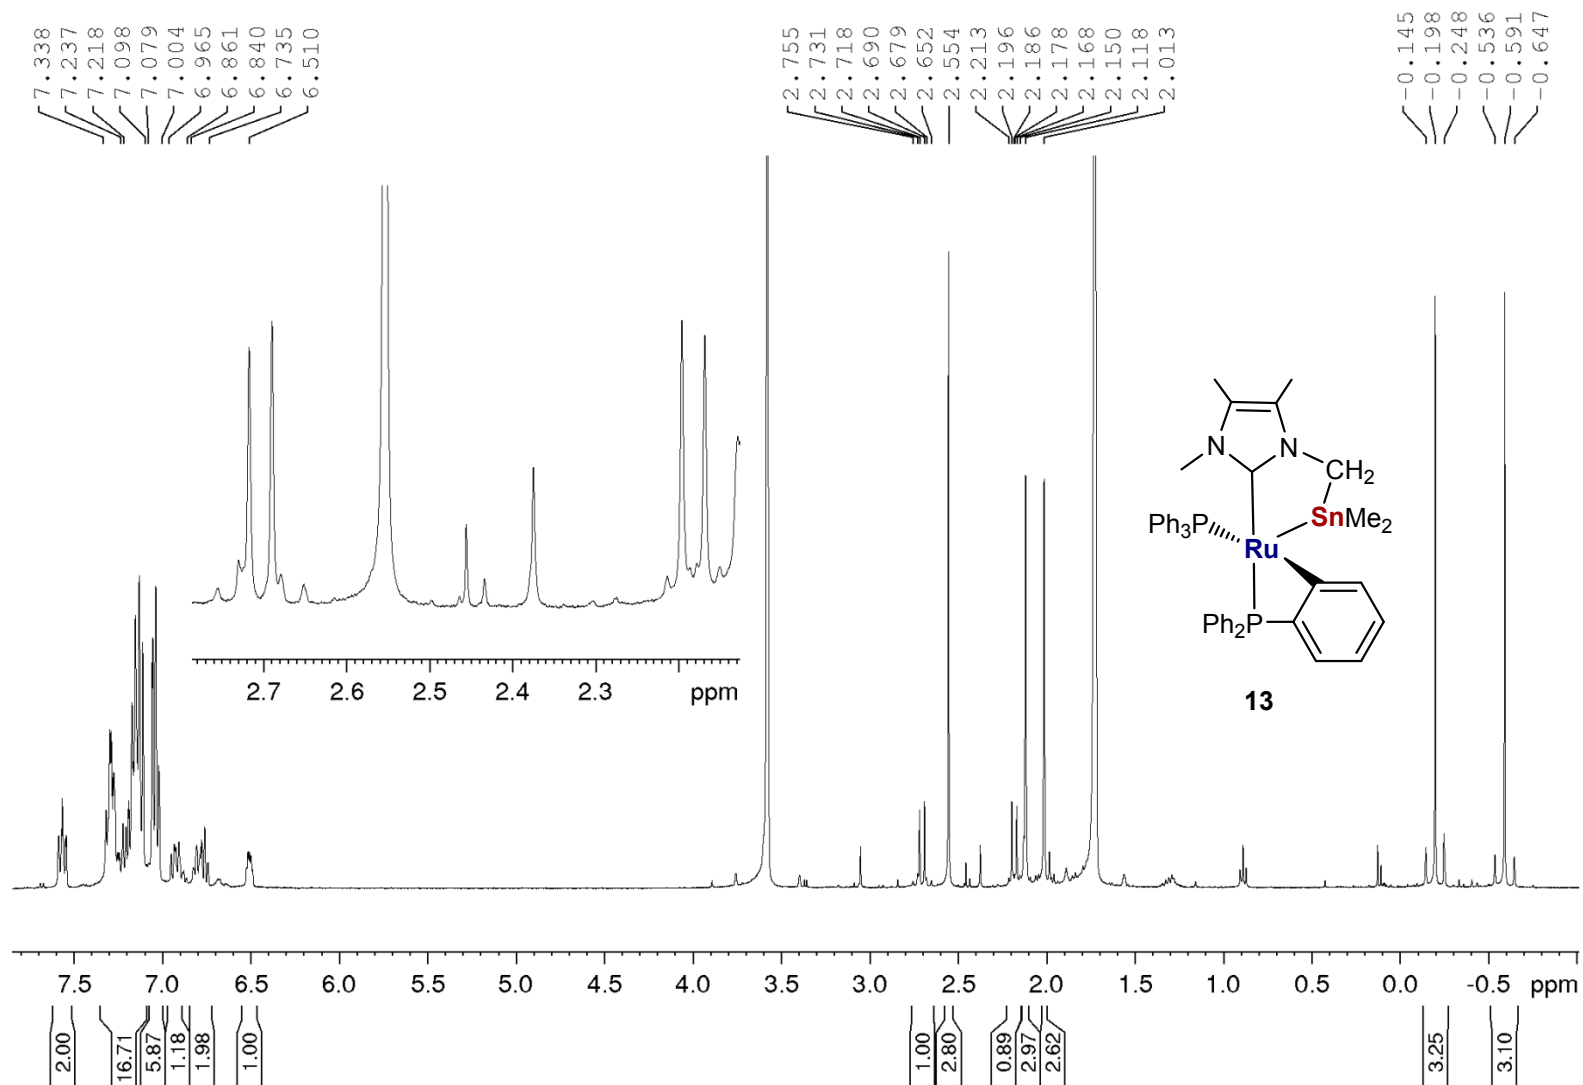

**Figure S56.**  $^1\text{H}$  NMR spectrum (400 MHz,  $\text{THF-}d_8$ , 298 K) of  $[\text{Ru}(\text{PPh}_3)(\text{IMe}_4'\text{-SnMe}_2)(\text{C}_6\text{H}_4\text{PPh}_2)]$  **13**. Inset highlights the inequivalent  $\text{CH}_2$  protons of the  $\text{IMe}_4'\text{-SnMe}_2$  ligand.

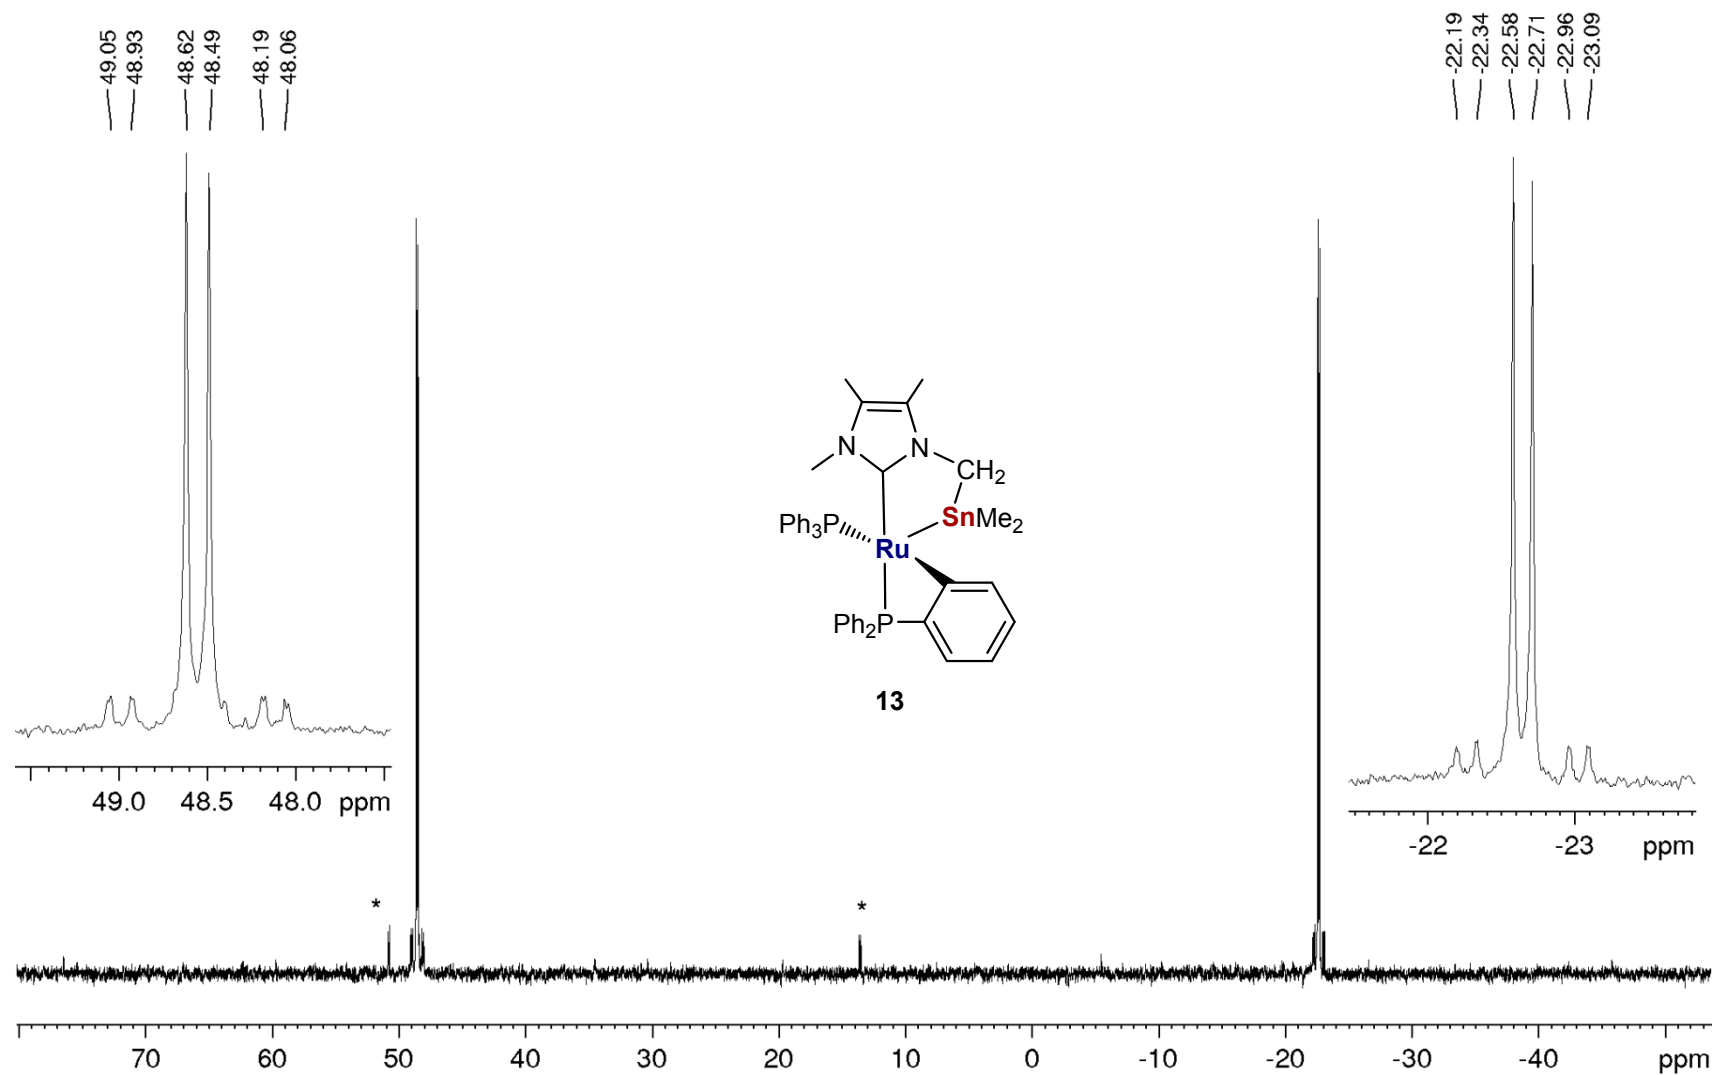

**Figure S57.**  $^{31}\text{P}\{^1\text{H}\}$  NMR spectrum (162 MHz,  $\text{THF-}d_8$ , 298 K) of  $[\text{Ru}(\text{PPh}_3)(\text{IME}_4'\text{-SnMe}_2)(\text{C}_6\text{H}_4\text{PPh}_2)]$  **13**, with inset of the two resonances. The resonances marked \* arise from an unknown, secondary product.



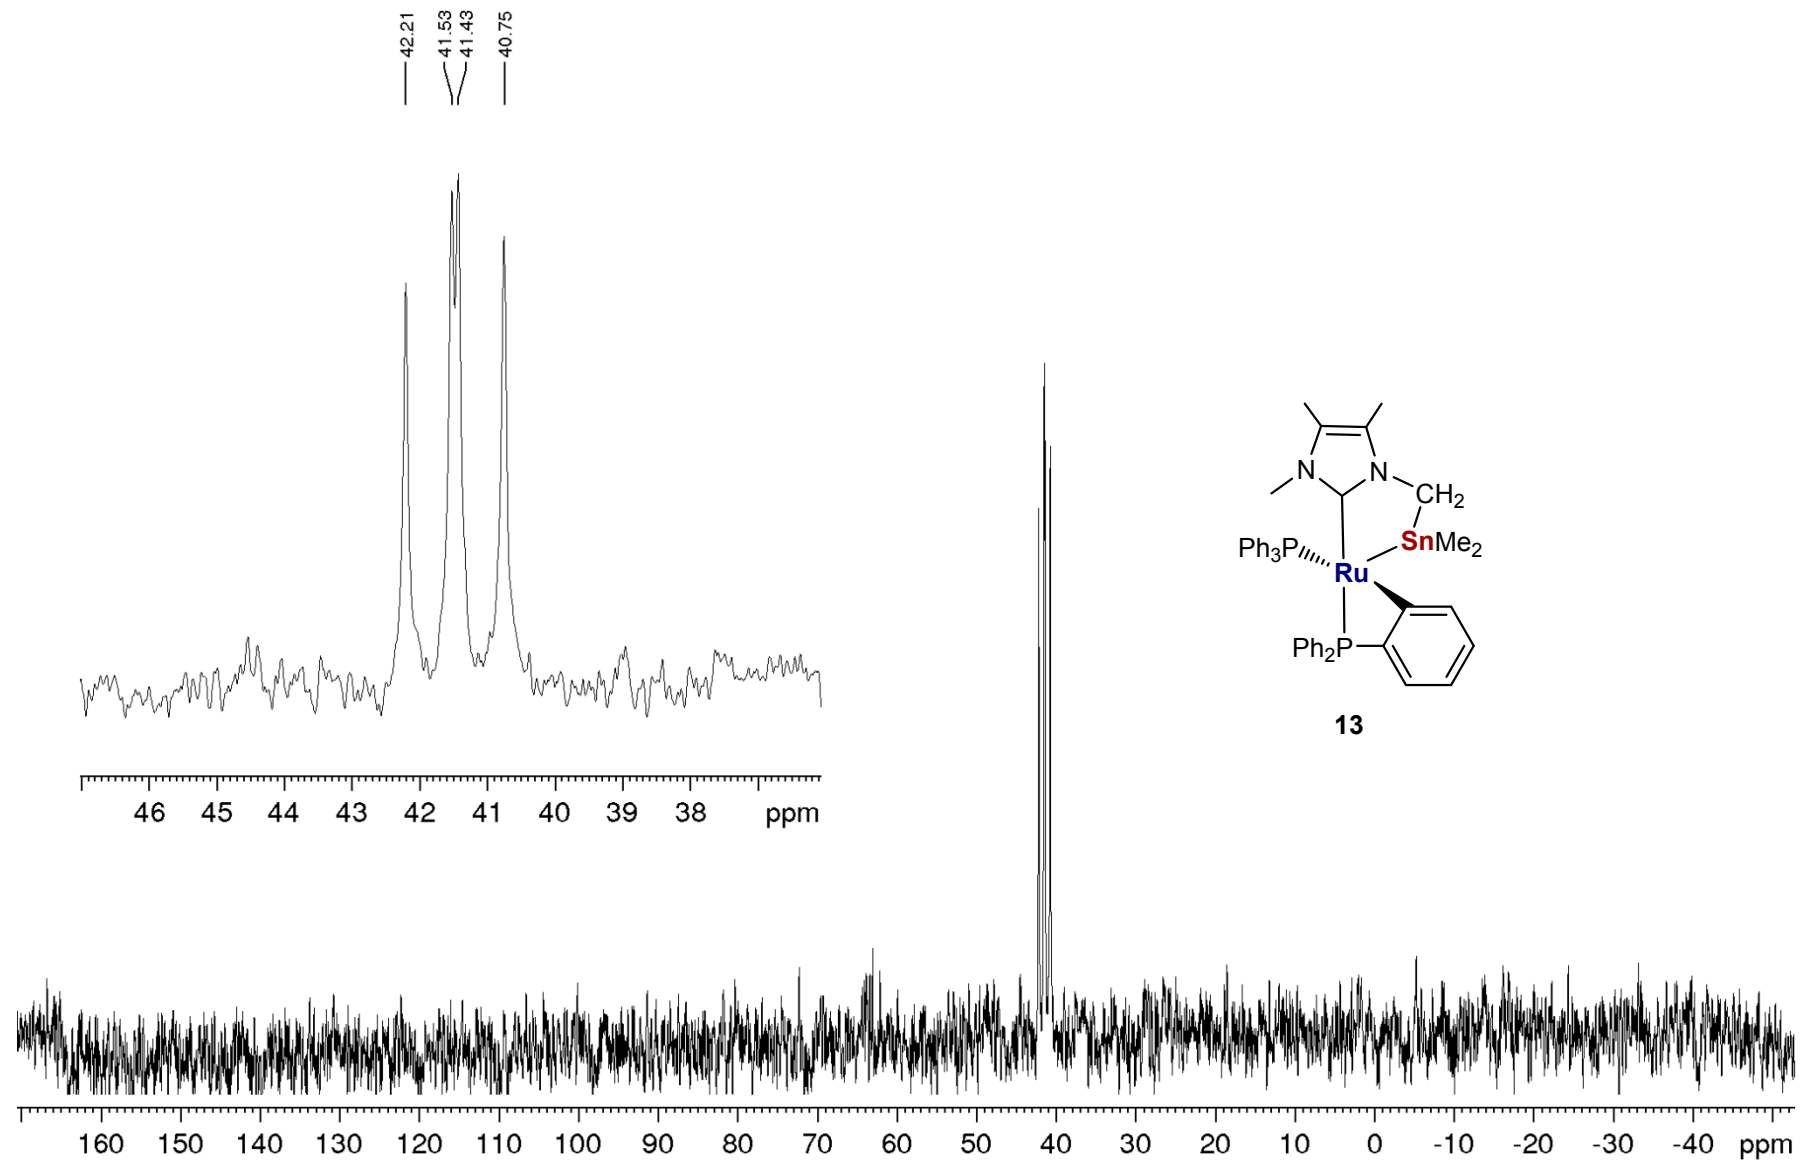

**Figure S58.**  $^{119}\text{Sn}\{^1\text{H}\}$  NMR spectrum (187 MHz,  $\text{THF-}d_8$ , 298 K) of  $[\text{Ru}(\text{PPh}_3)(\text{IME}_4'\text{-SnMe}_2)(\text{C}_6\text{H}_4\text{PPh}_2)]$  **13**.

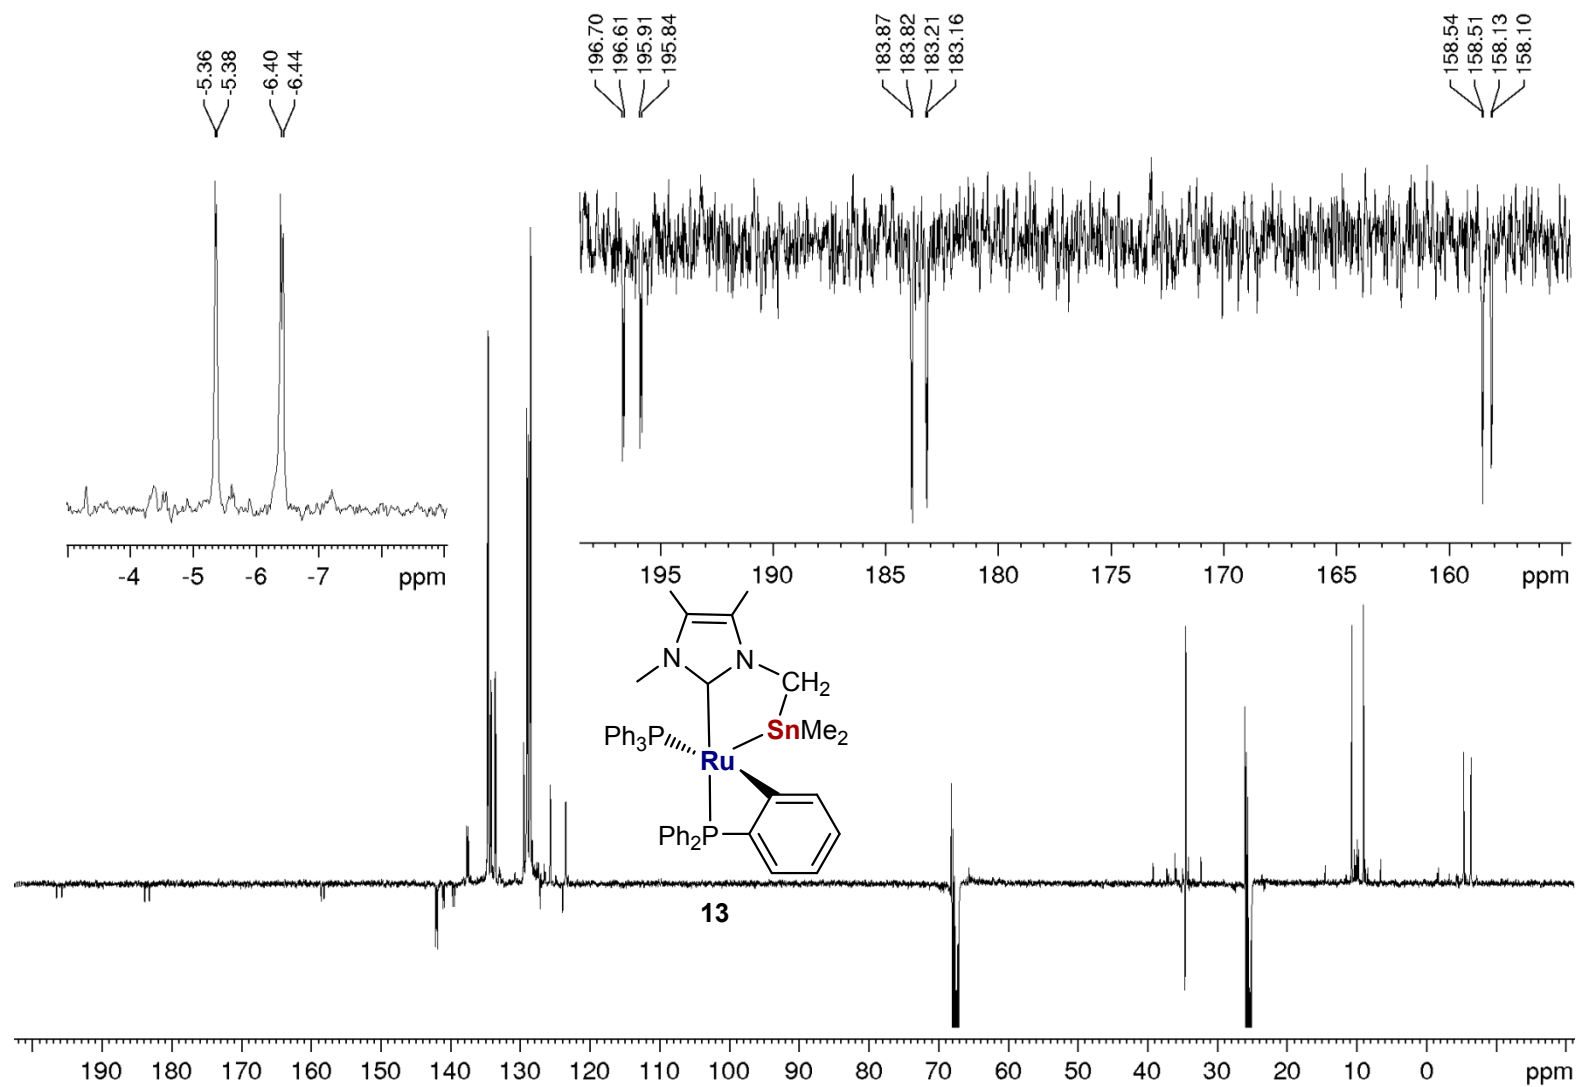

**Figure S59.**  $^{13}\text{C}\{^1\text{H}\}$  DEPT-Q NMR spectrum (101 MHz, THF- $d_8$ , 298 K) of  $[\text{Ru}(\text{PPh}_3)(\text{IME}_4'\text{-SnMe}_2)(\text{C}_6\text{H}_4\text{PPh}_2)]$  **13** with highest and lowest frequency signals shown in insets.

**Table S1.** Crystal data and structural refinement details for compounds **5-6** and **9-13**.

| Identification code                                        | <b>5</b>                                                            | <b>6</b>                                                            | <b>9</b>                                                            | <b>10</b>                                                           | <b>11</b>                                                           | <b>12</b>                                                           | <b>13</b>                                                           |
|------------------------------------------------------------|---------------------------------------------------------------------|---------------------------------------------------------------------|---------------------------------------------------------------------|---------------------------------------------------------------------|---------------------------------------------------------------------|---------------------------------------------------------------------|---------------------------------------------------------------------|
| Empirical formula                                          | C <sub>67</sub> H <sub>70</sub> AlO <sub>2</sub> P <sub>3</sub> Ru  | C <sub>56</sub> H <sub>49</sub> P <sub>3</sub> RuSn                 | C <sub>41</sub> H <sub>34</sub> O <sub>3</sub> P <sub>2</sub> RuSn  | C <sub>64</sub> H <sub>70</sub> N <sub>4</sub> P <sub>2</sub> RuSn  | C <sub>52</sub> H <sub>58</sub> N <sub>4</sub> P <sub>2</sub> RuSn  | C <sub>48</sub> H <sub>63</sub> N <sub>6</sub> PRuSn                | C <sub>45</sub> H <sub>46</sub> N <sub>2</sub> P <sub>2</sub> RuSn  |
| Formula weight                                             | 1128.19                                                             | 1034.62                                                             | 856.38                                                              | 1176.94                                                             | 1020.72                                                             | 974.77                                                              | 896.54                                                              |
| Crystal system                                             | monoclinic                                                          | monoclinic                                                          | orthorhombic                                                        | monoclinic                                                          | monoclinic                                                          | triclinic                                                           | triclinic                                                           |
| Space group                                                | <i>P</i> 2 <sub>1</sub> / <i>c</i>                                  | <i>P</i> 2 <sub>1</sub> / <i>c</i>                                  | <i>Pbca</i>                                                         | <i>P</i> 2 <sub>1</sub> / <i>c</i>                                  | <i>P</i> 2 <sub>1</sub> / <i>n</i>                                  | <i>P</i> -1                                                         | <i>P</i> -1                                                         |
| <i>a</i> / Å                                               | 10.7869(2)                                                          | 15.7864(4)                                                          | 13.4185(2)                                                          | 11.5411(3)                                                          | 11.7722(2)                                                          | 10.4377(4)                                                          | 10.3666(3)                                                          |
| <i>b</i> / Å                                               | 34.2175(6)                                                          | 12.6654(2)                                                          | 17.1831(2)                                                          | 22.1259(4)                                                          | 20.4465(3)                                                          | 11.9373(4)                                                          | 10.6624(4)                                                          |
| <i>c</i> / Å                                               | 15.7686(3)                                                          | 24.4671(5)                                                          | 30.8438(4)                                                          | 22.0265(5)                                                          | 20.0653(3)                                                          | 19.2141(4)                                                          | 20.9764(8)                                                          |
| <i>α</i> / °                                               | 90                                                                  | 90                                                                  | 90                                                                  | 90                                                                  | 90                                                                  | 77.750(2)                                                           | 80.871(3)                                                           |
| <i>β</i> / °                                               | 101.294(2)                                                          | 108.426(2)                                                          | 90                                                                  | 90.292(2)                                                           | 100.565(2)                                                          | 88.569(2)                                                           | 86.150(3)                                                           |
| <i>γ</i> / °                                               | 90                                                                  | 90                                                                  | 90                                                                  | 90                                                                  | 90                                                                  | 66.613(3)                                                           | 62.494(4)                                                           |
| <i>U</i> / Å <sup>3</sup>                                  | 5707.49(19)                                                         | 4641.18(18)                                                         | 7111.70(16)                                                         | 5624.6(2)                                                           | 4747.85(13)                                                         | 2142.63(13)                                                         | 2030.40(14)                                                         |
| <i>Z</i>                                                   | 4                                                                   | 4                                                                   | 8                                                                   | 4                                                                   | 4                                                                   | 2                                                                   | 2                                                                   |
| <i>ρ</i> <sub>calc</sub> / g cm <sup>-3</sup>              | 1.313                                                               | 1.481                                                               | 1.600                                                               | 1.390                                                               | 1.428                                                               | 1.511                                                               | 1.466                                                               |
| <i>μ</i> / mm <sup>-1</sup>                                | 0.419                                                               | 8.171                                                               | 1.255                                                               | 0.813                                                               | 7.689                                                               | 8.156                                                               | 1.099                                                               |
| <i>F</i> (000)                                             | 2360.0                                                              | 2096.0                                                              | 3424.0                                                              | 2424.0                                                              | 2088.0                                                              | 1004.0                                                              | 908.0                                                               |
| Crystal size/ mm <sup>3</sup>                              | 0.238 × 0.191 × 0.11                                                | 0.217 × 0.115 × 0.079                                               | 0.429 × 0.166 × 0.126                                               | 0.427 × 0.417 × 0.148                                               | 0.058 × 0.053 × 0.042                                               | 0.083 × 0.072 × 0.047                                               | 0.5 × 0.385 × 0.075                                                 |
| 2θ range for data collection/ °                            | 6.886 to 56.56                                                      | 5.902 to 146.428                                                    | 5.784 to 59.574                                                     | 5.826 to 60.826                                                     | 6.226 to 144.154                                                    | 8.274 to 146.206                                                    | 5.902 to 60.386                                                     |
| Index ranges                                               | -14 ≤ <i>h</i> ≤ 14,<br>-45 ≤ <i>k</i> ≤ 45,<br>-20 ≤ <i>l</i> ≤ 20 | -19 ≤ <i>h</i> ≤ 19,<br>-15 ≤ <i>k</i> ≤ 10,<br>-30 ≤ <i>l</i> ≤ 30 | -18 ≤ <i>h</i> ≤ 18,<br>-23 ≤ <i>k</i> ≤ 23,<br>-42 ≤ <i>l</i> ≤ 42 | -15 ≤ <i>h</i> ≤ 15,<br>-29 ≤ <i>k</i> ≤ 30,<br>-31 ≤ <i>l</i> ≤ 30 | -14 ≤ <i>h</i> ≤ 14,<br>-21 ≤ <i>k</i> ≤ 25,<br>-21 ≤ <i>l</i> ≤ 24 | -12 ≤ <i>h</i> ≤ 12,<br>-14 ≤ <i>k</i> ≤ 14,<br>-23 ≤ <i>l</i> ≤ 14 | -14 ≤ <i>h</i> ≤ 13,<br>-14 ≤ <i>k</i> ≤ 13,<br>-28 ≤ <i>l</i> ≤ 27 |
| Reflections collected                                      | 57540                                                               | 59904                                                               | 55779                                                               | 52488                                                               | 32059                                                               | 24315                                                               | 21816                                                               |
| Independent reflections, <i>R</i> <sub>int</sub>           | 14019, 0.0537                                                       | 9252, 0.0581                                                        | 9415, 0.0383                                                        | 15125, 0.0316                                                       | 9232, 0.0531                                                        | 8539, 0.0462                                                        | 10349, 0.0287                                                       |
| Data/restraints/ parameters                                | 14019/173/690                                                       | 9252/0/552                                                          | 9415/0/435                                                          | 15125/27/689                                                        | 9232/1/558                                                          | 8539/0/481                                                          | 10349/2/480                                                         |
| Goodness-of-fit on <i>F</i> <sup>2</sup>                   | 1.014                                                               | 1.049                                                               | 1.075                                                               | 1.068                                                               | 1.018                                                               | 1.020                                                               | 1.115                                                               |
| Final <i>R</i> 1, <i>wR</i> 2 [ <i>I</i> ≥ 2σ( <i>I</i> )] | 0.0430, 0.0809                                                      | 0.0293, 0.0742                                                      | 0.0290, 0.0548                                                      | 0.0339, 0.0590                                                      | 0.0335, 0.0789                                                      | 0.0320, 0.0658                                                      | 0.0476, 0.0904                                                      |
| Final <i>R</i> 1, <i>wR</i> 2 [all data]                   | 0.0686, 0.0890                                                      | 0.0326, 0.0765                                                      | 0.0407, 0.0583                                                      | 0.0507, 0.0647                                                      | 0.0412, 0.0832                                                      | 0.0396, 0.0688                                                      | 0.0617, 0.0960                                                      |
| Largest diff. peak/hole/ e Å <sup>-3</sup>                 | 0.46/-0.35                                                          | 0.58/-0.70                                                          | 0.52/-0.46                                                          | 1.09/-0.67                                                          | 1.63/-0.45                                                          | 0.66/-0.62                                                          | 1.46/-0.95                                                          |

## Computational Details

### Breakdown of Energy Contributions

The following tables detail the evolution of the relative energies as the successive corrections to the initial SCF energy are included. Terms used are:

|                                |                                                                                   |
|--------------------------------|-----------------------------------------------------------------------------------|
| $\Delta E_{\text{BS1}}$        | SCF energy computed with the BP86 functional with BS1                             |
| $\Delta H_{\text{BS1}}$        | Enthalpy at 0 K with BS1                                                          |
| $\Delta G_{\text{BS1}}$        | Free energy at 298.15 K and 1 atm with BS1                                        |
| $\Delta G_{\text{BS1/bnz}}$    | Free energy corrected for benzene solvent with BS1                                |
| $\Delta G_{\text{BS1/bnz+D3}}$ | Free energy corrected for benzene and dispersion effects with BS1                 |
| $\Delta G_{\text{bnz}}$        | Free energy corrected for basis set (BS2), dispersion effects and benzene solvent |

In each case the final data used in the main article is highlighted in bold.

**Table S2.** Relative energies (kcal/mol) for computed structures. Data in bold are those used in the main text. All energies are quoted relative to **5** (for the  $M' = \text{Al}$  system) or *V* (for the  $M' = \text{Sn}$  system) at 0.0 kcal/mol. Note that **8'** is an alternative isomer of **8** shown below, the energy of which was also computed for comparison.

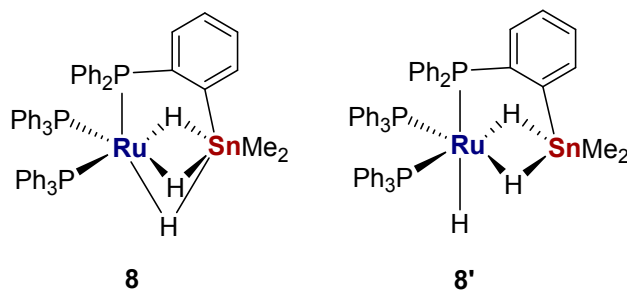

|                   | $\Delta E_{\text{BS1}}$ | $\Delta H_{\text{BS1}}$ | $\Delta G_{\text{BS1}}$ | $\Delta G_{\text{BS1/bnz}}$ | $\Delta G_{\text{BS1/bnz+D3}}$ | $\Delta E_{\text{BS2}}$ | $\Delta G_{\text{bnz}}$ |
|-------------------|-------------------------|-------------------------|-------------------------|-----------------------------|--------------------------------|-------------------------|-------------------------|
| <b>5</b>          | 0.0                     | 0.0                     | 0.0                     | 0.0                         | 0.0                            | 0.0                     | <b>0.0</b>              |
| <b>5 (no THF)</b> | 6.4                     | 5.0                     | -7.7                    | 6.0                         | -8.1                           | 3.4                     | <b>4.5</b>              |
| <i>IV</i>         | 7.7                     | 8.4                     | -6.6                    | 7.7                         | -6.6                           | 5.1                     | <b>6.0</b>              |
| <i>IV (+THF)</i>  | -0.8                    | 1.8                     | 2.5                     | -0.2                        | 3.0                            | -0.4                    | <b>-1.6</b>             |
| <b>7</b>          | -46.7                   | -34.6                   | -21.8                   | -46.1                       | -21.2                          | -45.9                   | <b>-20.0</b>            |
| <i>V</i>          | 0.0                     | 0.0                     | 0.0                     | 0.0                         | 0.0                            | 0.0                     | <b>0.0</b>              |
| <b>6</b>          | -17.2                   | -19.0                   | -29.3                   | -17.3                       | -29.4                          | -17.7                   | <b>-20.6</b>            |
| <b>5Sn</b>        | -9.9                    | -14.1                   | -23.6                   | -10.2                       | -23.9                          | -10.9                   | <b>-12.8</b>            |
| <b>8</b>          | -37.1                   | -27.4                   | -13.1                   | -36.7                       | -12.7                          | -34.3                   | <b>-9.3</b>             |
| <b>8'</b>         | -35.2                   | -25.8                   | -12.8                   | -35.0                       | -12.5                          | -33.7                   | <b>-6.6</b>             |

**Table S3.** Wiberg Bond Index (WBI) values (computed with NBO3.1) for BP86/BS1 optimized geometries at the BP86/BS2 level of theory.

| <b>Ru-M' Wiberg Bond Index (WBI)</b> |        |
|--------------------------------------|--------|
| <b>5</b>                             | 0.2531 |
| <b>5-THF</b>                         | 0.2742 |
| <b><i>IV</i></b>                     | 0.5164 |
| <b><i>IV</i>+THF</b>                 | 0.4798 |
| <b><i>V</i></b>                      | 0.7102 |
| <b>6</b>                             | 0.7236 |
| <b>5Sn</b>                           | 0.4713 |

**WBI Discussion.** ChemDraw representations of species *IV*, *IV*+THF, *V* and **6** all depict an interaction between Ru and the equivalent M atom. This is validated by the Wiberg Bond Indices (WBI) given in Table S3, which show significantly larger covalent interactions than in **5**, **5-THF** and **5Sn** (where a hydride bridges the Ru...M' distance). In particular, for M' = Sn, these covalent interactions are significantly larger for *V* and **6**, in comparison to *IV*, likely due to the larger size of Sn compared to Al. This is further evidenced by the lower WBI values for **5** in contrast to **5Sn**.

**Molecular orbital analysis.** MOs are orientated in Figure S60 “above” the Ru–M' axis (in the top axial position as ChemDraw structures have been drawn) to best display any orbital interactions along the Ru–M' axis. All carbon-bound hydrogens are hidden, leaving the hydride ligand visible when present. HOMOs and LUMOs do not show clear bonding interactions between Ru and M'; in some instances antibonding orbitals on the Ru are depicted. Therefore, lower molecular orbitals were investigated to locate orbitals that showed overlap between the Ru and M' atoms. For those species containing a hydride between Ru and M', which also have lower WBI values (**5**, **5-THF** and **5Sn**), HOMO-1 shows Ru orbital

lobes along the Ru-M' axis with little/no matching M' lobes. For the other four computed species, which exhibit a Ru-M' interaction and a larger WBI value (i.e. **IV**, **IV**+THF, **V** and **6**), HOMO-3 is the MO that first shows orbital lobe overlap between Ru and M', with additional interactions also observed in HOMO-4 for M' = Sn.

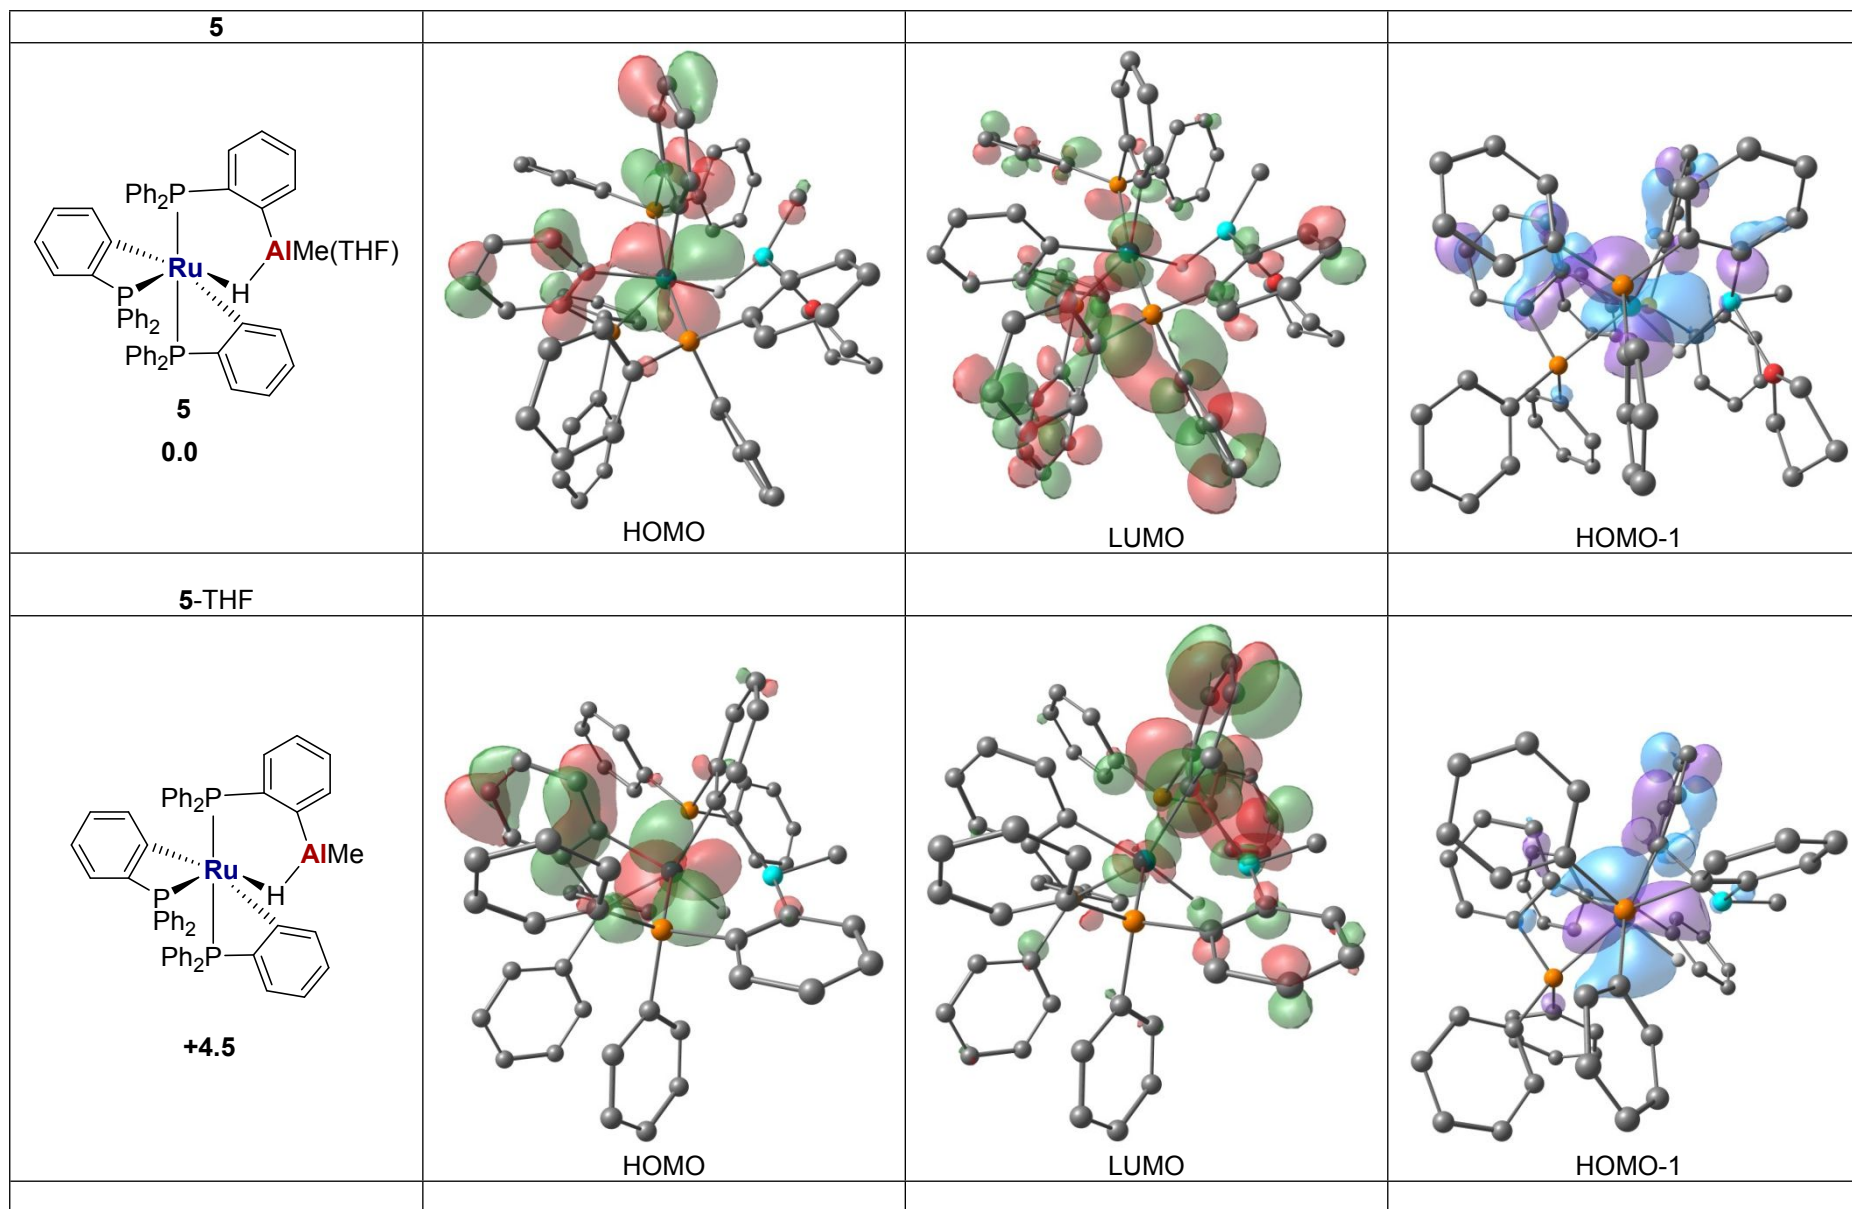



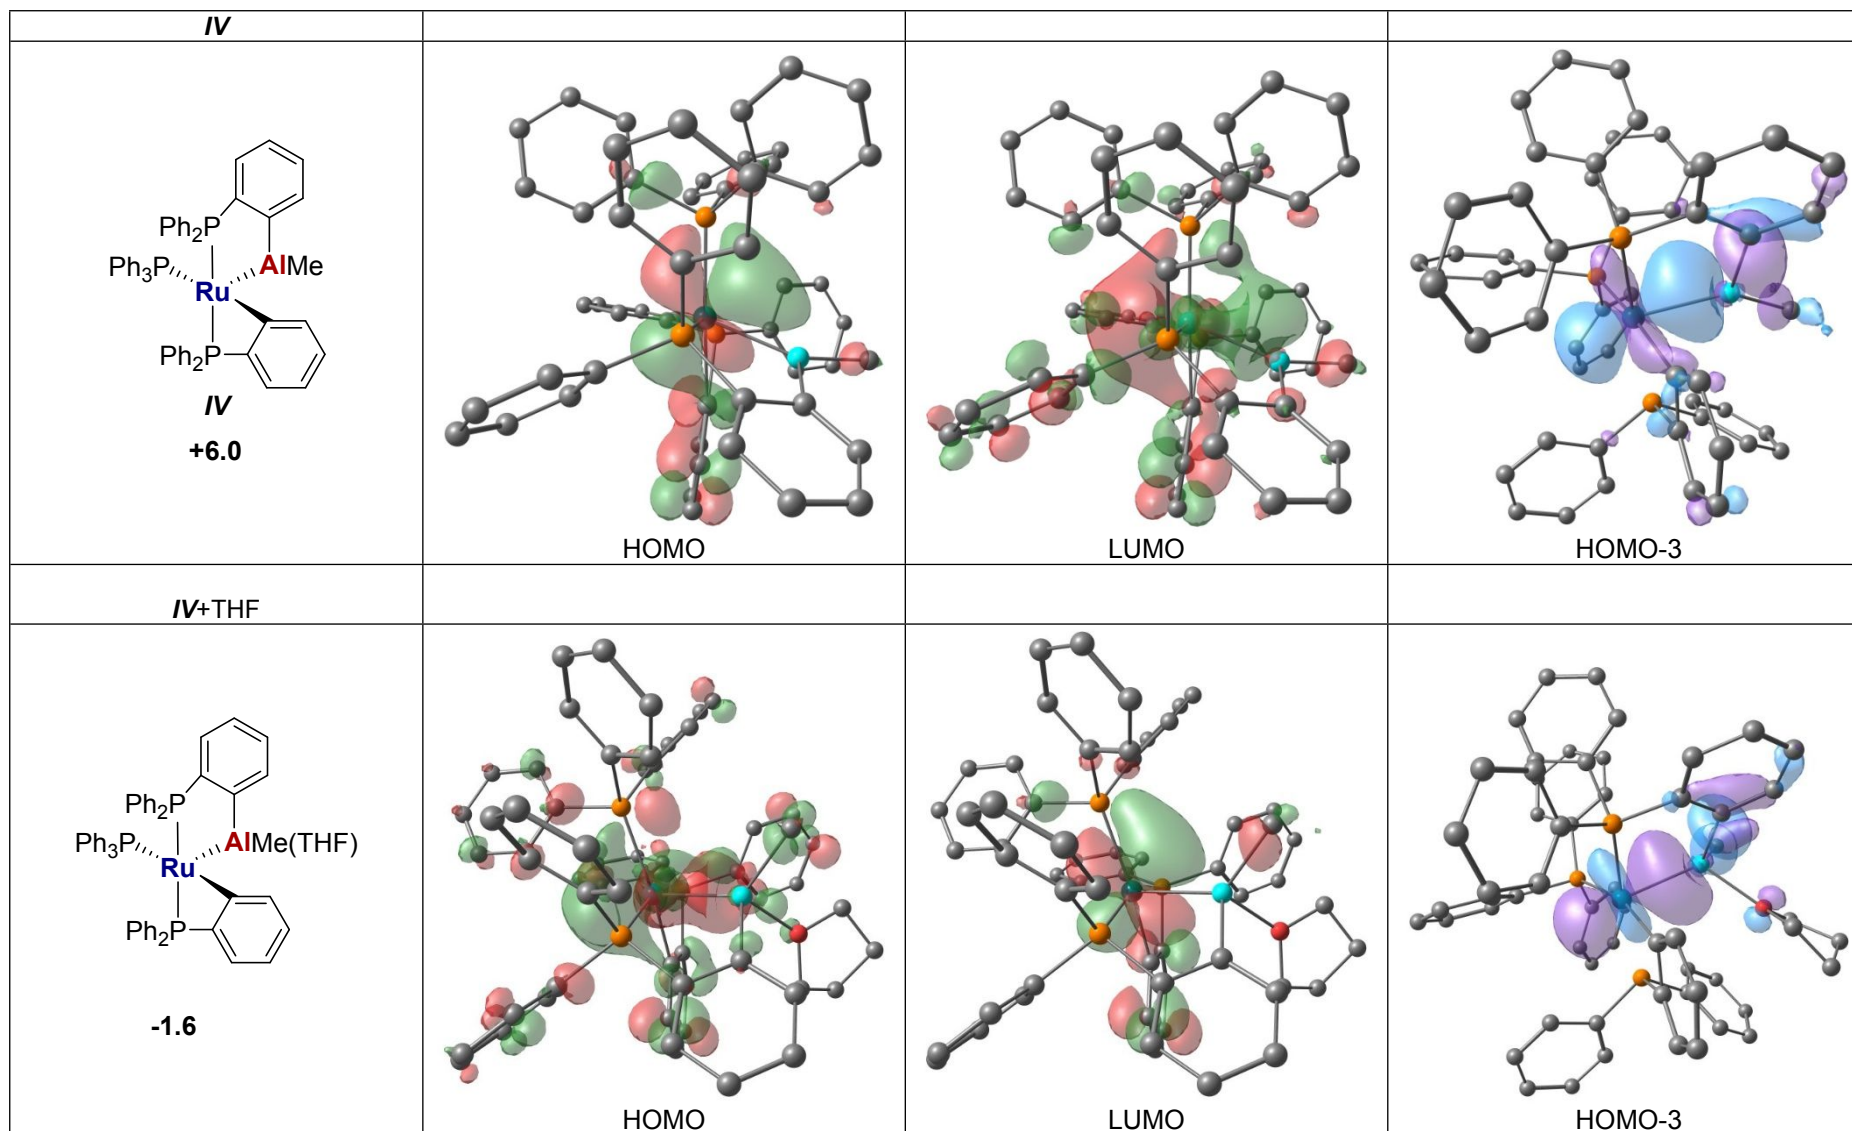

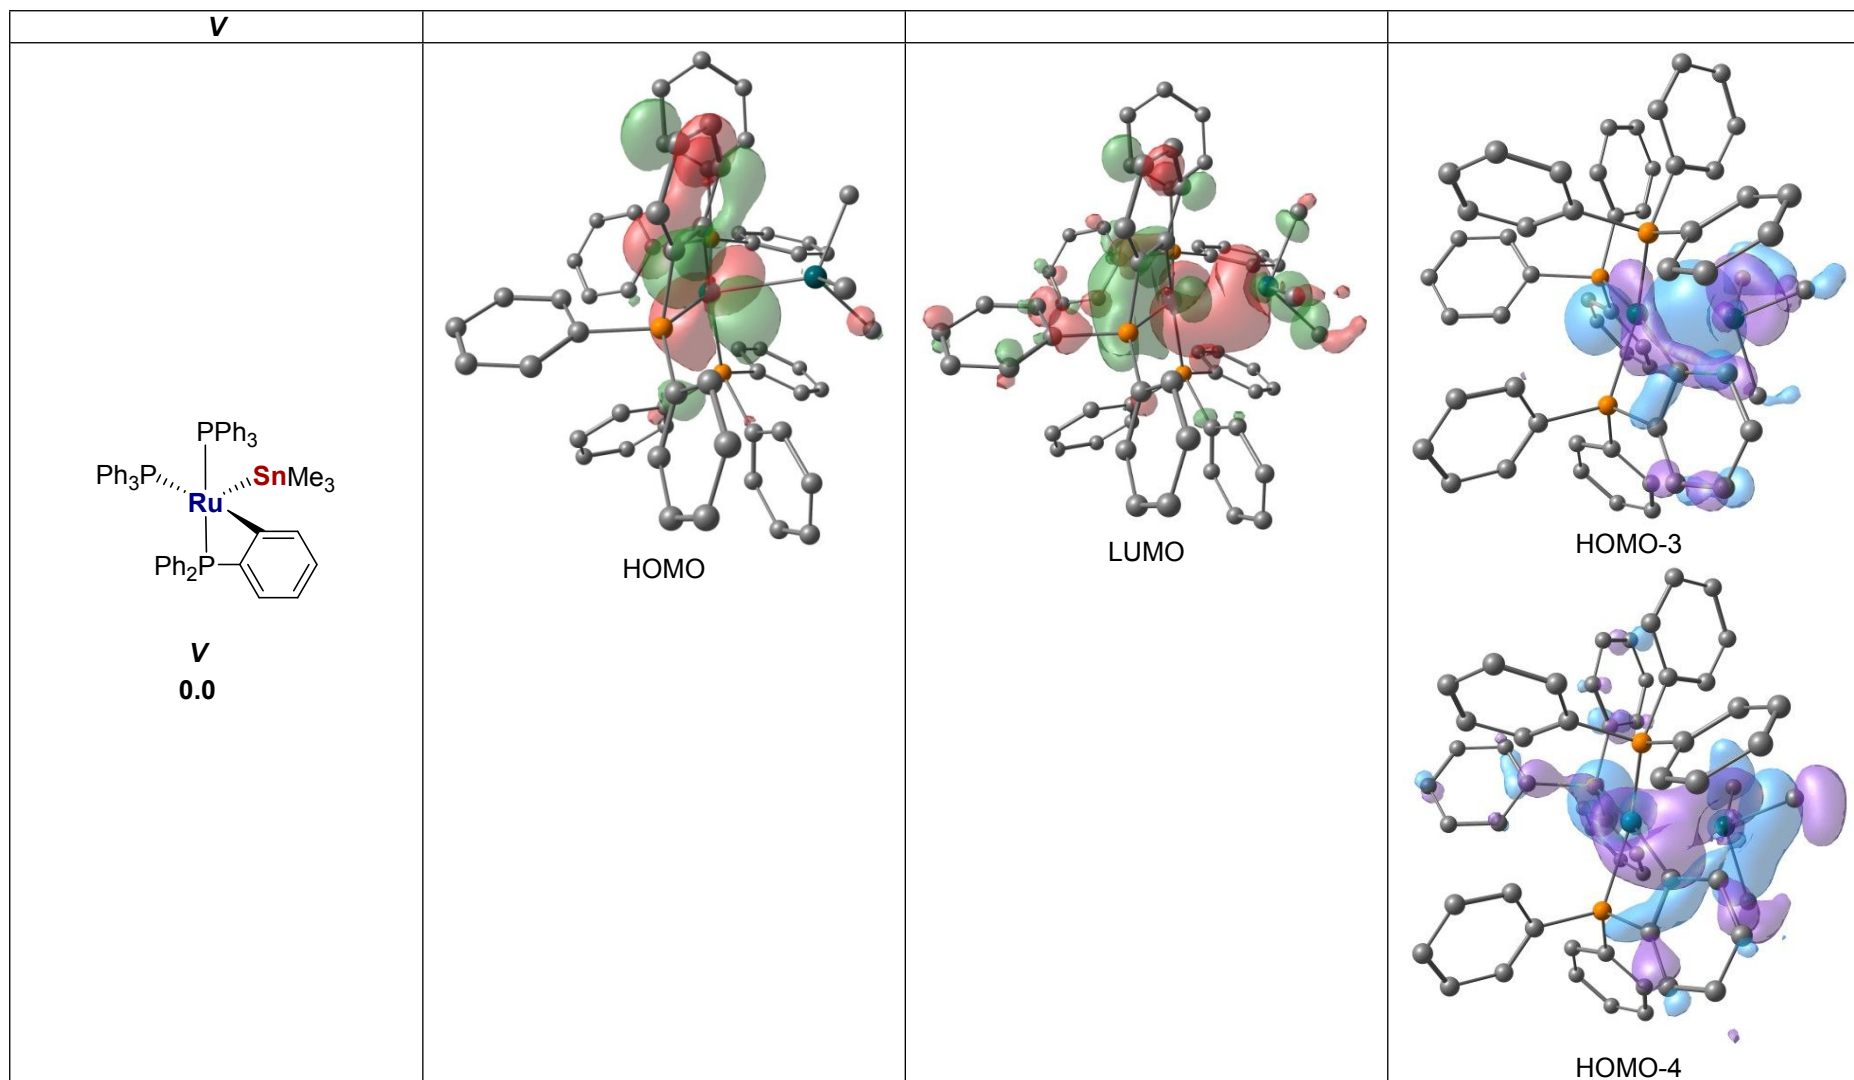

6

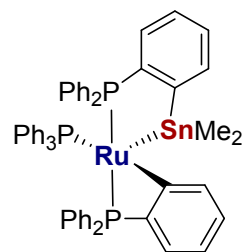

6  
-20.6

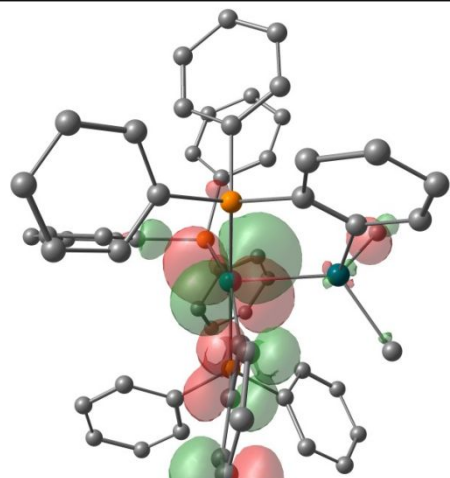

HOMO

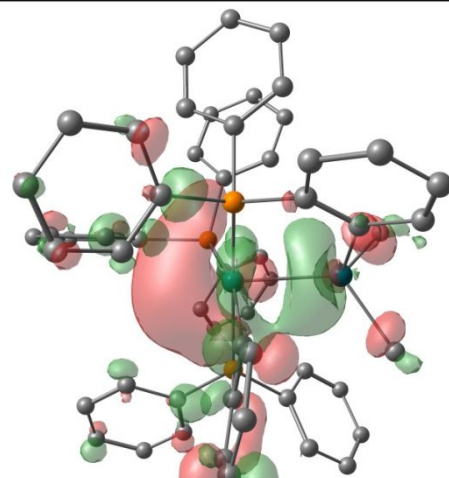

LUMO

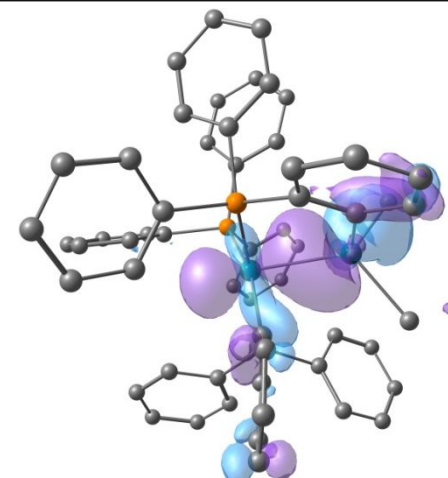

HOMO-3

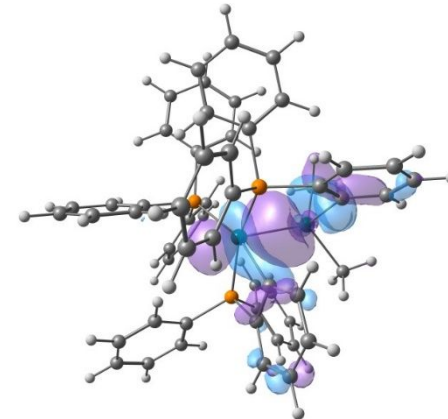

HOMO-4

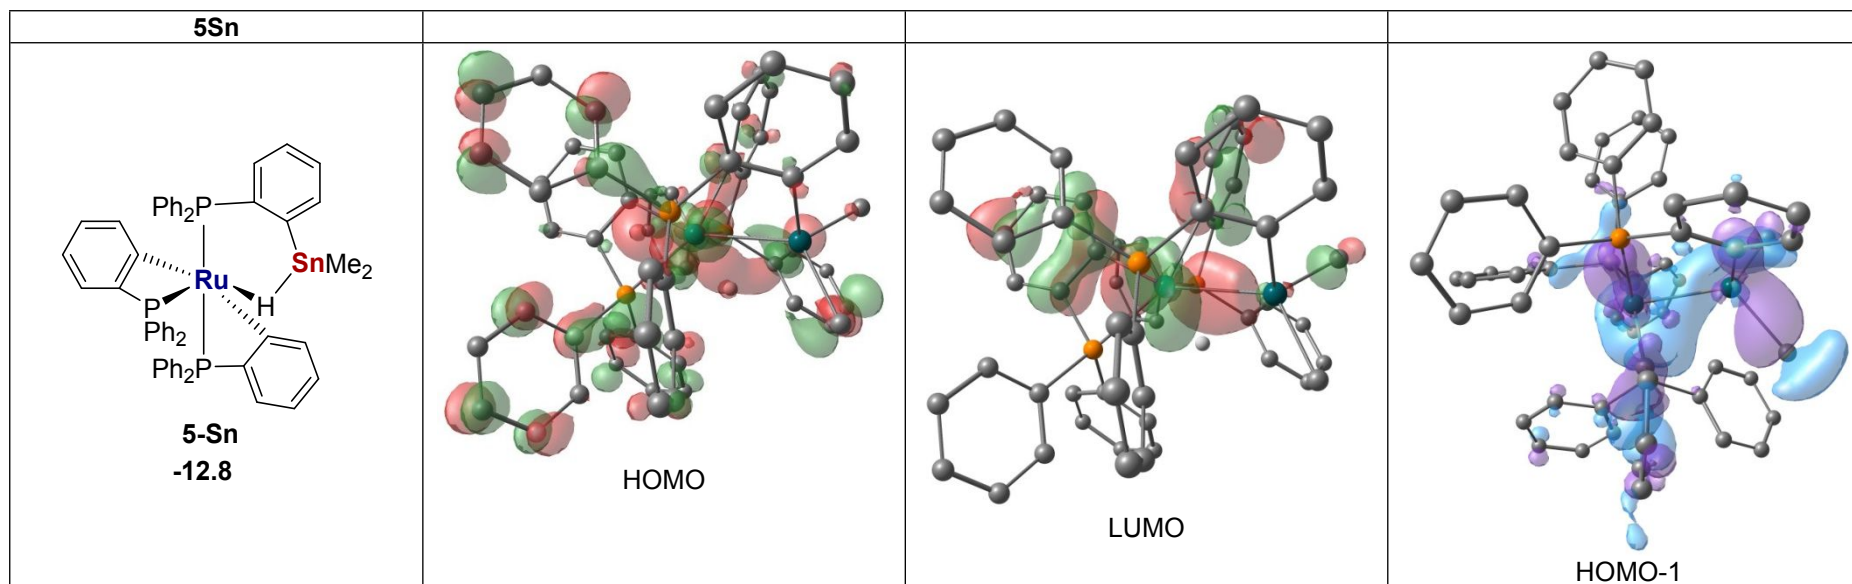

**Figure S60.** Molecular orbitals for species **5**, **5-THF**, **IV**, **IV+THF**, **V**, **6** and **5Sn**.

## Computed Energies (in Hartrees) for Calculated Structures

### **CH<sub>4</sub>**

SCF (BP86) Energy = -40.5161891552  
Enthalpy 0K = -40.472307  
Enthalpy 298K = -40.468489  
Free Energy 298K = -40.491996  
Lowest Frequency = 1306.0683 cm<sup>-1</sup>  
Second Frequency = 1306.0745 cm<sup>-1</sup>  
SCF (BP86-D3BJ) Energy = -40.5177375140  
SCF (C6H6) Energy = -40.5162814709  
SCF (BS2) Energy = -40.5270312324

### **THF**

SCF (BP86) Energy = -232.447574761  
Enthalpy 0K = -232.333967  
Enthalpy 298K = -232.327978  
Free Energy 298K = -232.363078  
Lowest Frequency = 23.1459 cm<sup>-1</sup>  
Second Frequency = 275.4150 cm<sup>-1</sup>  
SCF (BP86-D3BJ) Energy = -232.461052284  
SCF (C6H6) Energy = -232.448881463  
SCF (BS2) Energy = -232.511411715

### **H<sub>2</sub>**

SCF (BP86) Energy = -1.17646513415  
Enthalpy 0K = -1.166541  
Enthalpy 298K = -1.163236  
Free Energy 298K = -1.178048  
Lowest Frequency = 4356.2789 cm<sup>-1</sup>  
SCF (BP86-D3BJ) Energy = -1.17657513782  
SCF (C6H6) Energy = -1.17652522742  
SCF (BS2) Energy = -1.17751822060

### **PPh<sub>3</sub>**

SCF (BP86) Energy = -701.502630433  
Enthalpy 0K = -701.237092  
Enthalpy 298K = -701.219657  
Free Energy 298K = -701.284017  
Lowest Frequency = 23.6163 cm<sup>-1</sup>  
Second Frequency = 24.5324 cm<sup>-1</sup>  
SCF (BP86-D3BJ) Energy = -701.583034588  
SCF (C6H6) Energy = -701.505223899  
SCF (BS2) Energy = -1036.49654774

### **5**

SCF (BP86) Energy = -2472.83842845  
Enthalpy 0K = -2471.911618  
Enthalpy 298K = -2471.847444  
Free Energy 298K = -2472.014386  
Lowest Frequency = 16.2002 cm<sup>-1</sup>  
Second Frequency = 16.9930 cm<sup>-1</sup>  
SCF (BP86-D3BJ) Energy = -2473.25901800  
SCF (C6H6) Energy = -2472.84582575  
SCF (BS2) Energy = -3718.01799197

### **5 (without THF)**

SCF (BP86) Energy = -2240.38073462  
Enthalpy 0K = -2239.569622  
Enthalpy 298K = -2239.511987  
Free Energy 298K = -2239.663632  
Lowest Frequency = 14.9154 cm<sup>-1</sup>  
Second Frequency = 16.1979 cm<sup>-1</sup>  
SCF (BP86-D3BJ) Energy = -2240.76312427  
SCF (C6H6) Energy = -2240.38733254  
SCF (BS2) Energy = -3485.50117059

**IV**

SCF (BP86) Energy = -2240.37865538  
Enthalpy 0K = -2239.564269  
Enthalpy 298K = -2239.505831  
Free Energy 298K = -2239.661877  
Lowest Frequency = 10.1313 cm<sup>-1</sup>  
Second Frequency = 13.8267 cm<sup>-1</sup>  
SCF (BP86-D3BJ) Energy = -2240.76158424  
SCF (C6H6) Energy = -2240.38475975  
SCF (BS2) Energy = -3485.49848785

**IV (with THF)**

SCF (BP86) Energy = -2472.83966882  
Enthalpy 0K = -2471.908738  
Enthalpy 298K = -2471.844588  
Free Energy 298K = -2472.010426  
Lowest Frequency = 13.7707 cm<sup>-1</sup>  
Second Frequency = 18.4659 cm<sup>-1</sup>  
SCF (BP86-D3BJ) Energy = -2473.26816391  
SCF (C6H6) Energy = -2472.84620755  
SCF (BS2) Energy = -3718.01864313

**V**

SCF (BP86) Energy = -2322.13526107  
Enthalpy 0K = -2321.238817  
Enthalpy 298K = -2321.174598  
Free Energy 298K = -2321.340878  
Lowest Frequency = 16.4447 cm<sup>-1</sup>  
Second Frequency = 18.9970 cm<sup>-1</sup>  
SCF (BP86-D3BJ) Energy = -2322.55869504  
SCF (C6H6) Energy = -2322.14123657  
SCF (BS2) Energy = -3537.85856204

**5-Sn**

SCF (BP86) Energy = -2281.63480476  
Enthalpy 0K = -2280.788938  
Enthalpy 298K = -2280.728085  
Free Energy 298K = -2280.886465  
Lowest Frequency = 16.6100 cm<sup>-1</sup>  
Second Frequency = 19.7196 cm<sup>-1</sup>  
SCF (BP86-D3BJ) Energy = -2282.03745998  
SCF (C6H6) Energy = -2281.64115379  
SCF (BS2) Energy = -3497.34882760

**6**

SCF (BP86) Energy = -2281.64644783  
Enthalpy 0K = -2280.796748  
Enthalpy 298K = -2280.735548  
Free Energy 298K = -2280.895500  
Lowest Frequency = 17.5381 cm<sup>-1</sup>  
Second Frequency = 19.4915 cm<sup>-1</sup>  
SCF (BP86-D3BJ) Energy = -2282.05351738  
SCF (C6H6) Energy = -2281.65259515  
SCF (BS2) Energy = -3497.35969703

**7**

SCF (BP86) Energy = -2242.80806424  
Enthalpy 0K = -2241.957824  
Enthalpy 298K = -2241.898755  
Free Energy 298K = -2242.054447  
Lowest Frequency = 14.8296 cm<sup>-1</sup>  
Second Frequency = 17.1774 cm<sup>-1</sup>  
SCF (BP86-D3BJ) Energy = -2243.19005179  
SCF (C6H6) Energy = -2242.81382488  
SCF (BS2) Energy = -3487.92934619

**8**

SCF (BP86) Energy = -2284.05848416

Enthalpy 0K = -2283.173415  
Enthalpy 298K = -2283.111117  
Free Energy 298K = -2283.272504  
Lowest Frequency = 17.1298 cm<sup>-1</sup>  
Second Frequency = 19.0250 cm<sup>-1</sup>  
SCF (BP86-D3BJ) Energy = -2284.46481165  
SCF (C6H6) Energy = -2284.06415280  
SCF (BS2) Energy = -3499.76937982

**8'**

SCF (BP86) Energy = -2284.05553450  
Enthalpy 0K = -2283.170862  
Enthalpy 298K = -2283.108300  
Free Energy 298K = -2283.272039  
Lowest Frequency = 12.4702 cm<sup>-1</sup>  
Second Frequency = 17.0388 cm<sup>-1</sup>  
SCF (BP86-D3BJ) Energy = -2284.45573577  
SCF (C6H6) Energy = -2284.06133291  
SCF (BS2) Energy = -3499.76848394
